# Supplementary material for: Exploring the Self-Assembled Tacticity in Aurophilic Polymeric Arrangements of Diphosphanegold(I) Fluorothiolates
Source: PubMed Central journal article supplement (PMC6930485; doi:10.3390/molecules24234422), 2019-12-03
Supplement: molecules-24-04422-s001.pdf [file molecules-24-04422-s001.pdf]

# Supplementary Information

## *Exploring the self-assembled tacticity in aurophilic polymeric arrangements of diphosphanegold(I) fluorothiolates*

Guillermo Moreno-Alcántar <sup>1,2\*</sup>, Laura Salazar <sup>2</sup>, Guillermo Romo-Islas <sup>2</sup>, Marcos Flores-Álamo <sup>2</sup> and Hugo Torrens <sup>2\*</sup>

<sup>1</sup> Institut de Science et d'Ingénierie Supramoléculaires (ISIS), University of Strasbourg;

<sup>2</sup> Facultad de Química, Universidad Nacional Autónoma de México.

\* Correspondence: morenoalcantar@unistra.fr, lgma@comunidad.unam.mx; Tel.: +52-55-5622-3724

### Contents

|                                                                      |    |
|----------------------------------------------------------------------|----|
| Supplementary figures .....                                          | 2  |
| NMR Spectra .....                                                    | 6  |
| Crystallographic tables .....                                        | 21 |
| Lead Thiolates (Pb(SR <sub>F</sub> ) <sub>2</sub> ) IR Spectra ..... | 59 |

## Supplementary figures

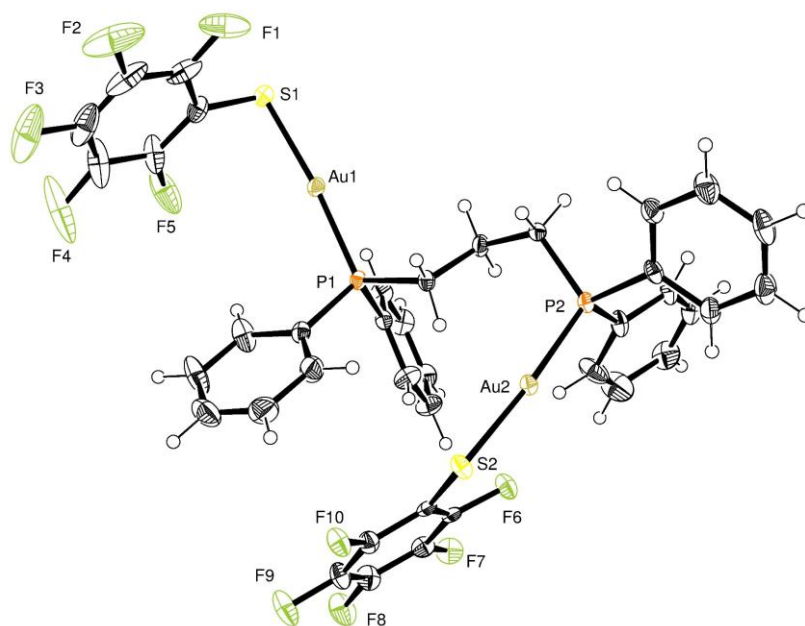

Figure S1 ORTEP drawing of the asymmetric unit for compound 1 with the thermal ellipsoids drawn at the 50% of probability.

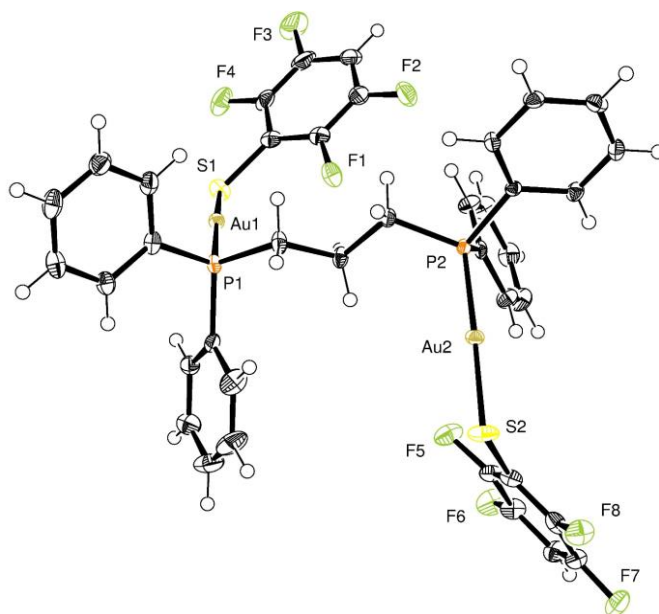

Figure S2 ORTEP drawing of the asymmetric unit for compound 2 with the thermal ellipsoids drawn at the 50% of probability.

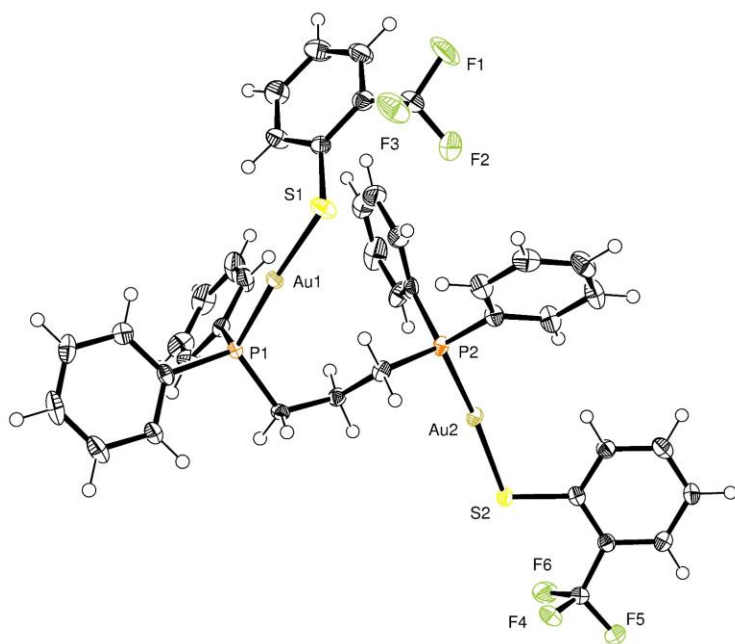

Figure S3 ORTEP drawing of the asymmetric unit for compound 4 with the thermal ellipsoids drawn at the 50% of probability.

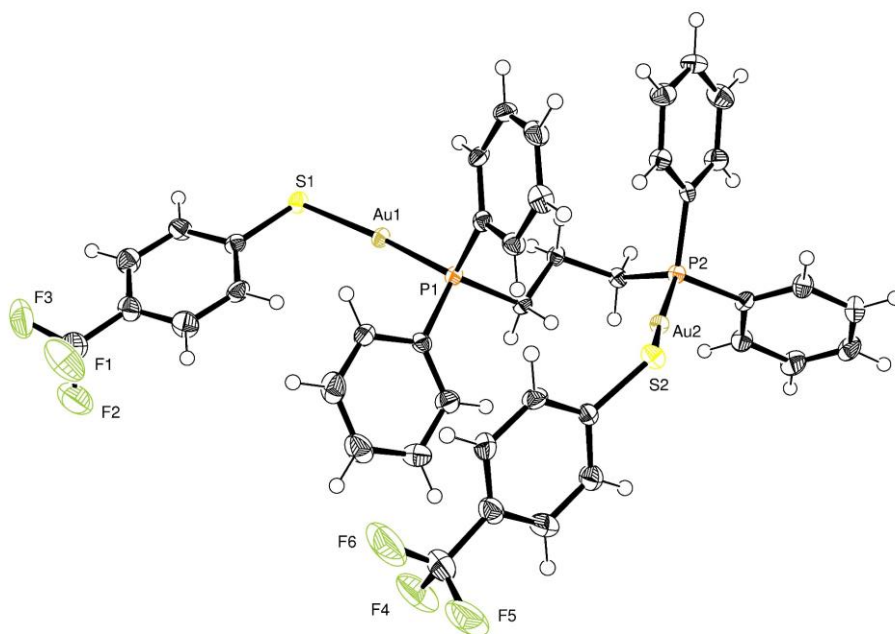

Figure S4. ORTEP drawing of the asymmetric unit for compound 5 with the thermal ellipsoids drawn at the 50% of probability. Chloroform molecules solvate are omitted for clarity.

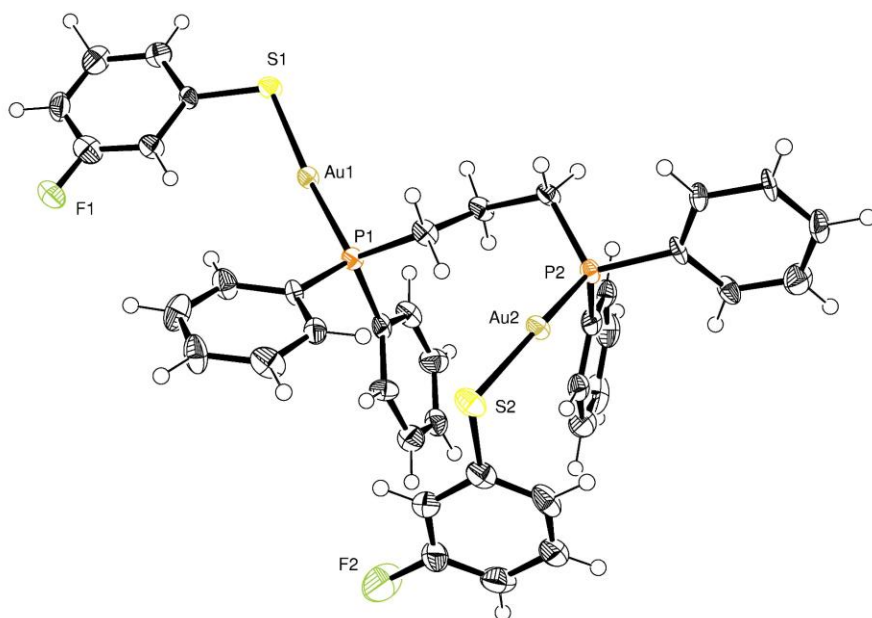

Figure S5 ORTEP drawing of the asymmetric unit for 9 with the thermal ellipsoids drawn at the 50% of probability.

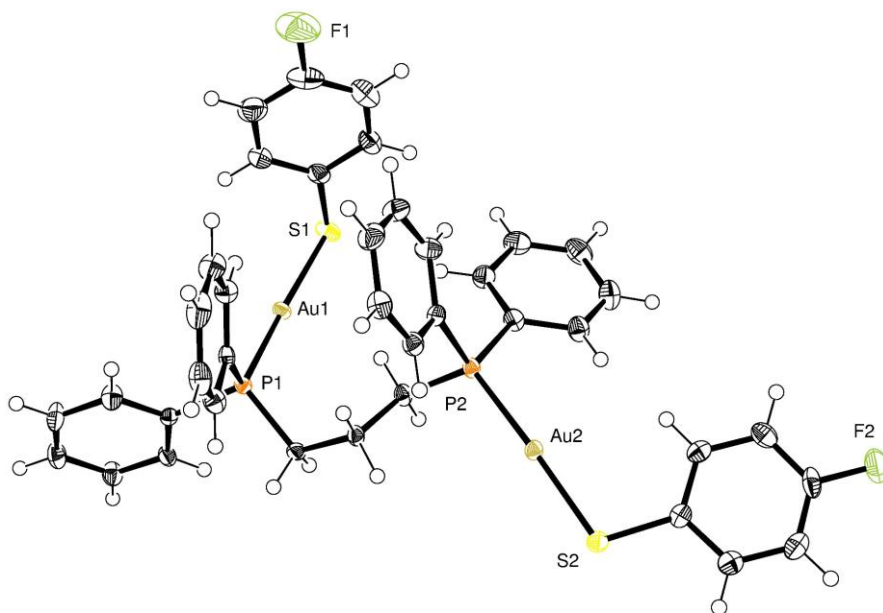

Figure S6 ORTEP drawing of the asymmetric unit for compound 10 with the thermal ellipsoids drawn at the 50% of probability.

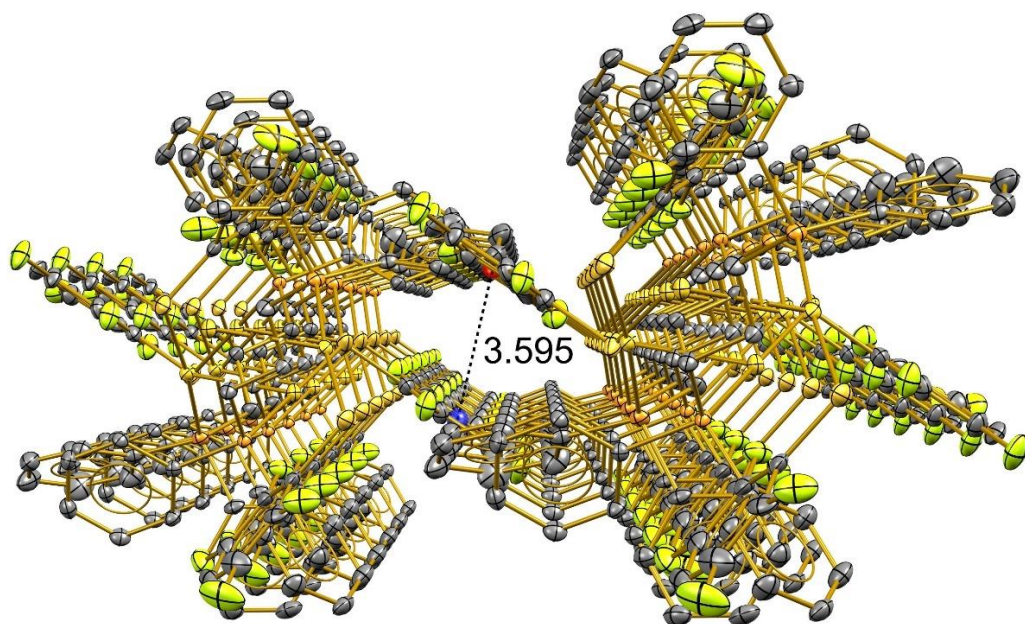

Figure S7 Lateral view over the *b* crystallographic axis of compound 2 showing two vicinal strands interacting by the stacking of fluorinated phenyl rings showing the centroid to centroid distance.

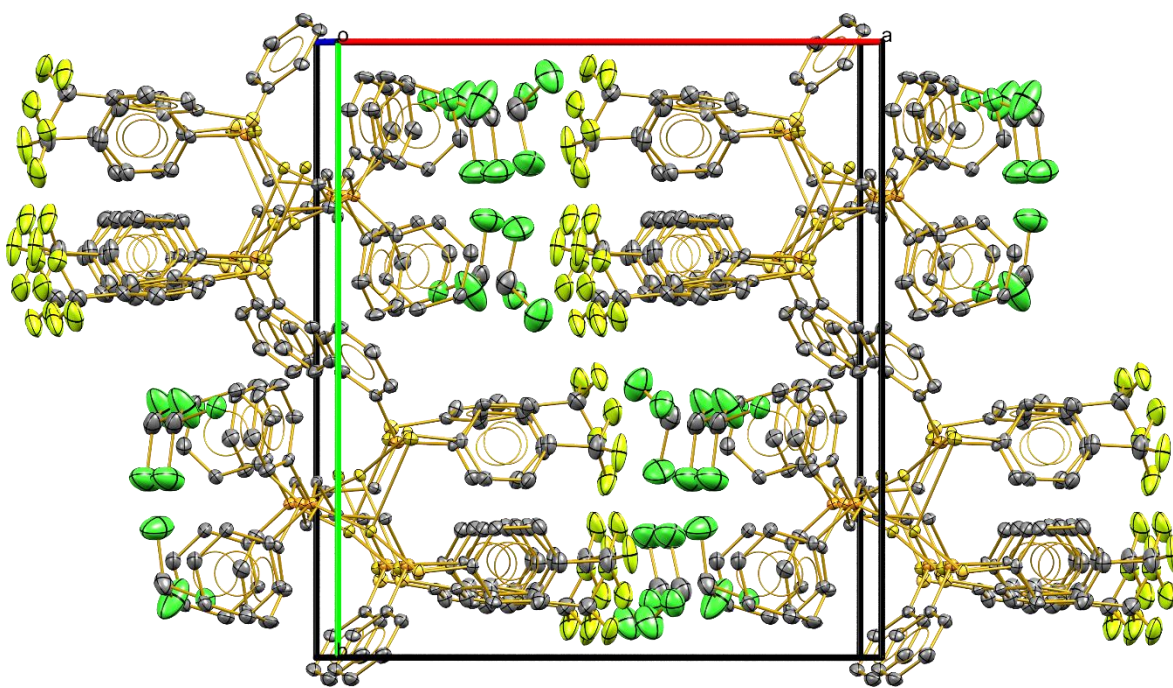

Figure S8 View of the crystalline packing of compound 5 showing the inclusion of solvent molecules that direct the CF<sub>3</sub> groups.

# NMR Spectra

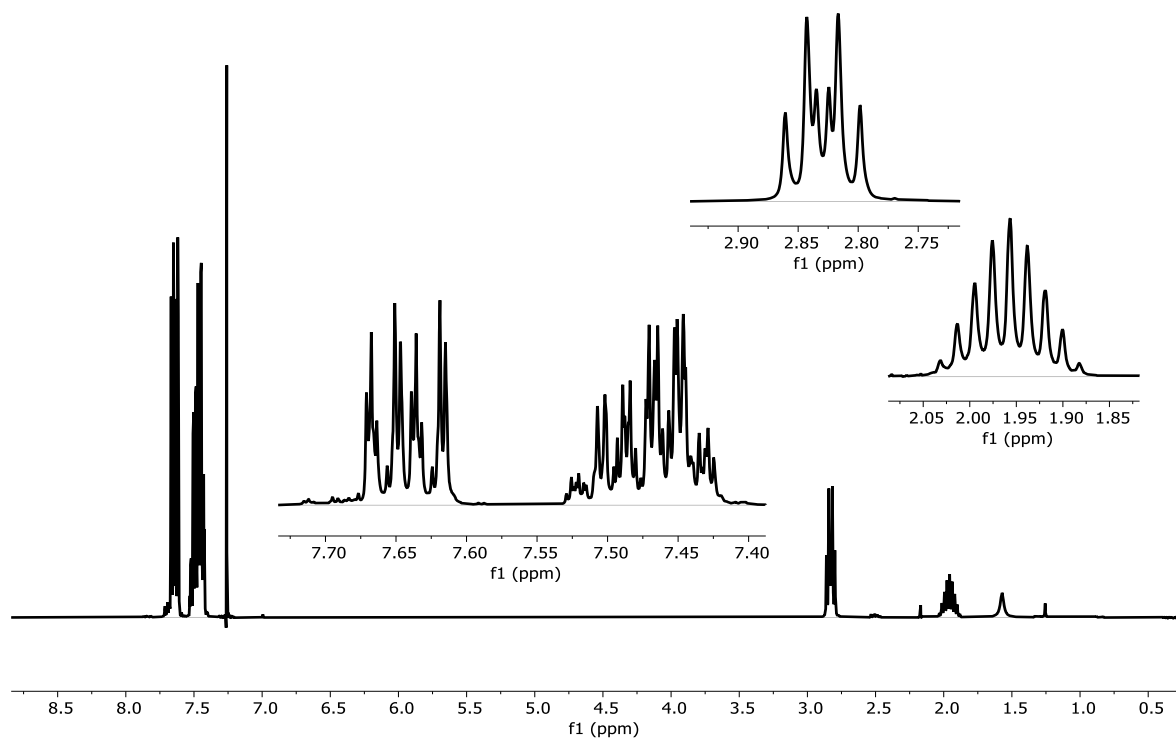

Figure S9 Detail of the  $^1\text{H}$ -NMR spectra of compound 1

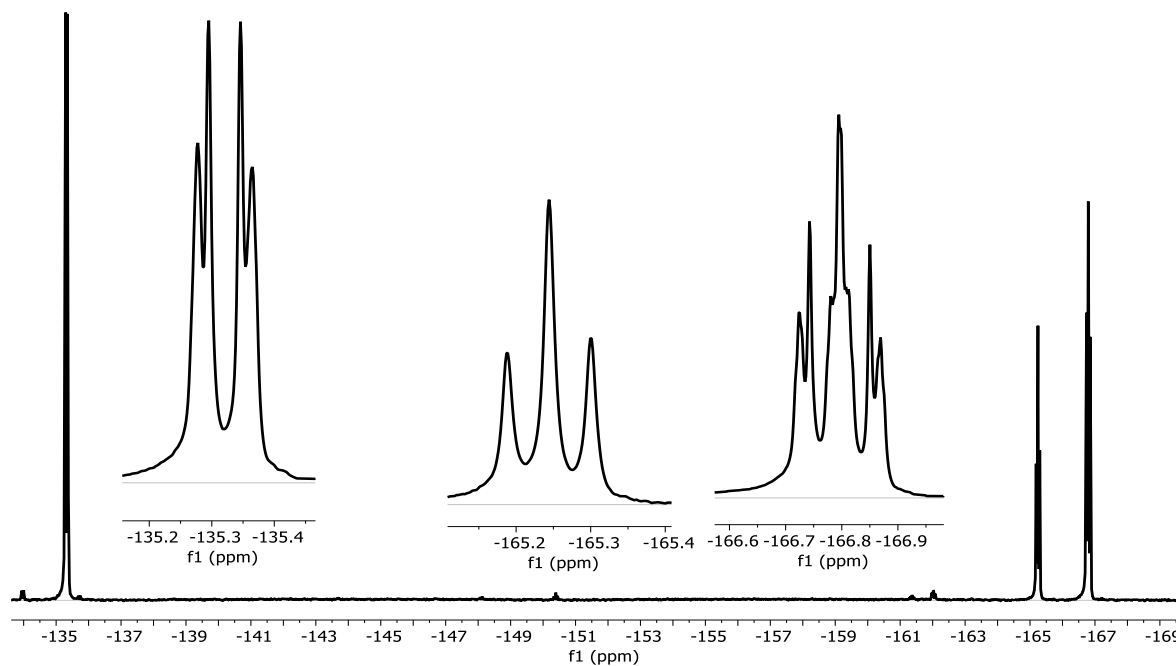

Figure S10 Detail of the  $^{19}\text{F}$ -NMR spectra of compound 1

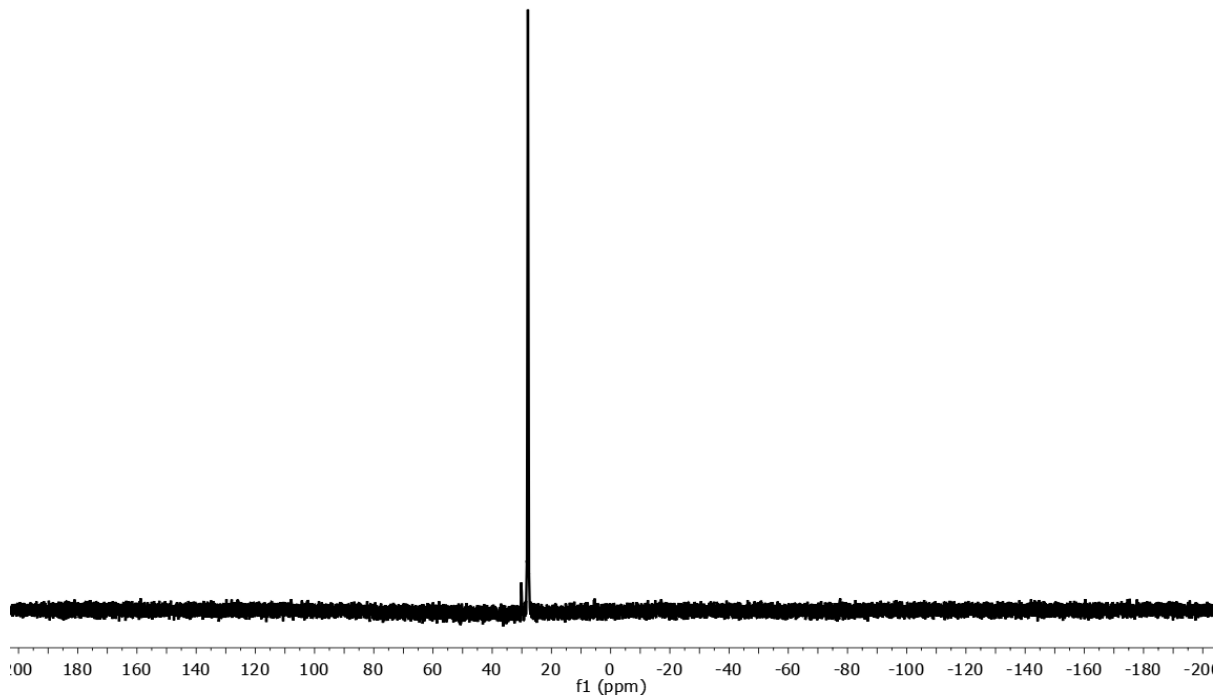

Figure S11 Detail of the  $^{31}\text{P}$ -NMR spectra of compound 1

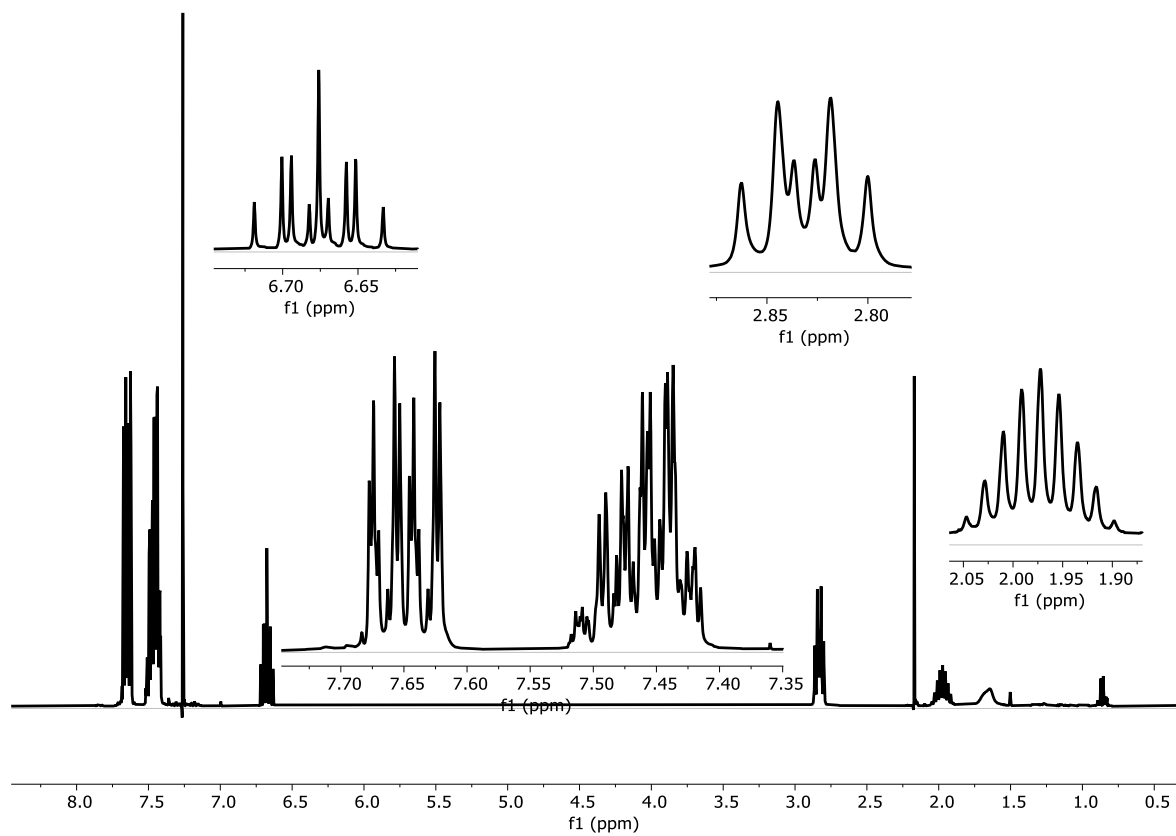

Figure S12 Detail of the  $^1\text{H}$ -NMR spectra of compound 2

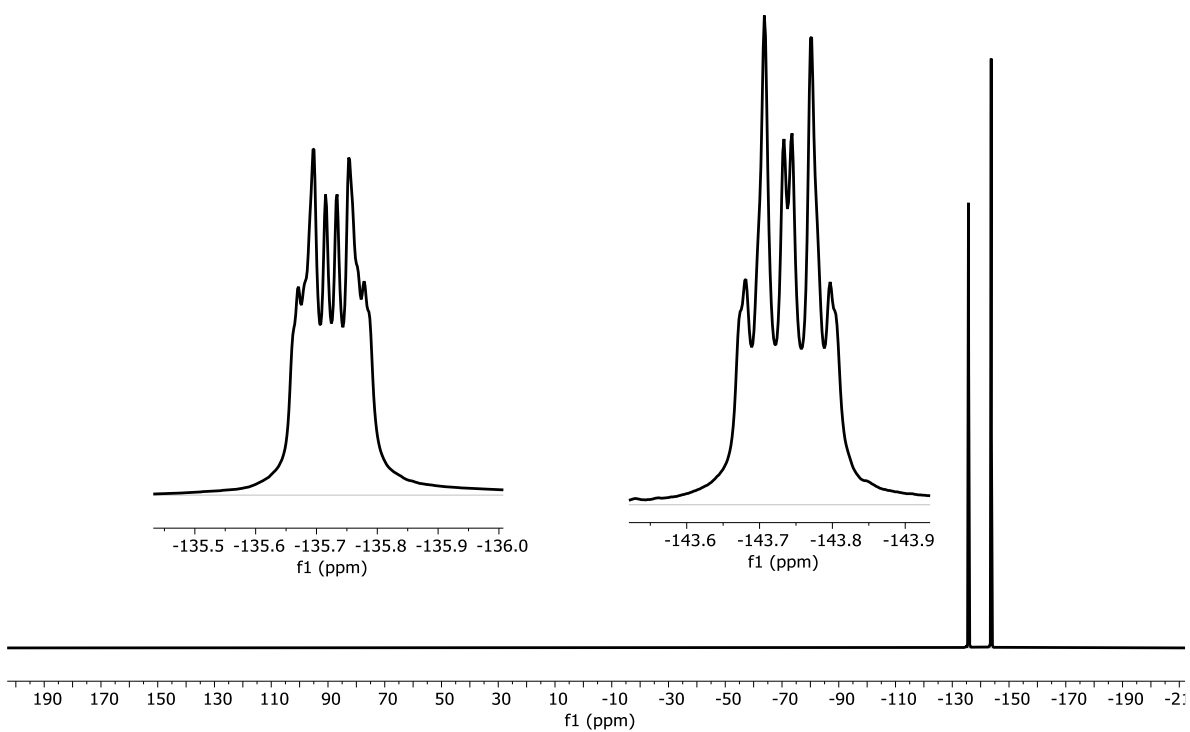

Figure S13 Detail of the  $^{19}\text{F}$ -NMR spectra of compound 2

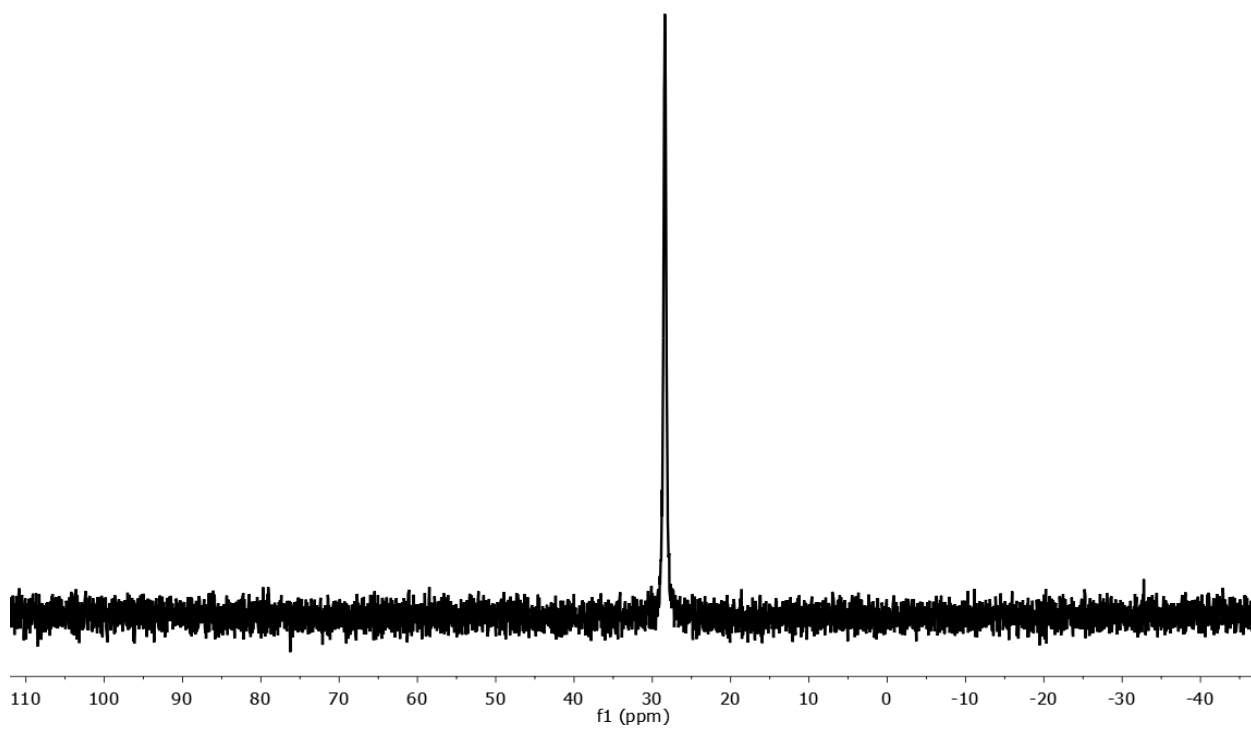

Figure S14 Detail of the  $^{31}\text{P}$ -NMR spectra of compound 2



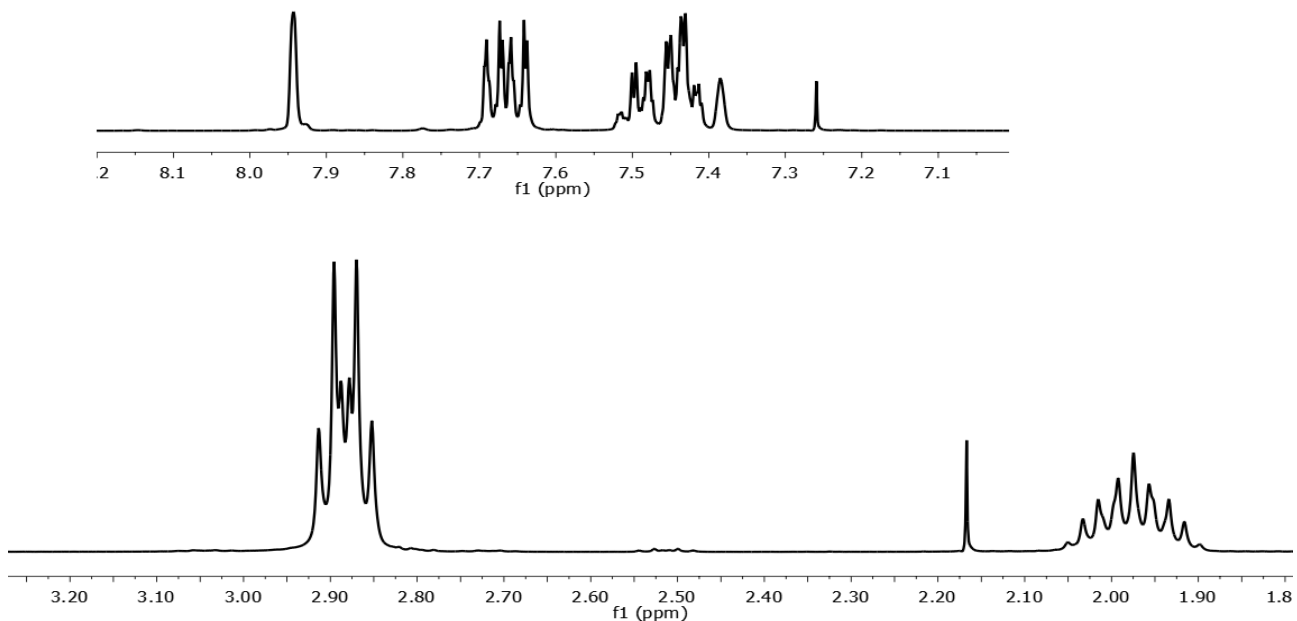

Figure S15 Detail of the  $^1\text{H-NMR}$  spectra of compound 3

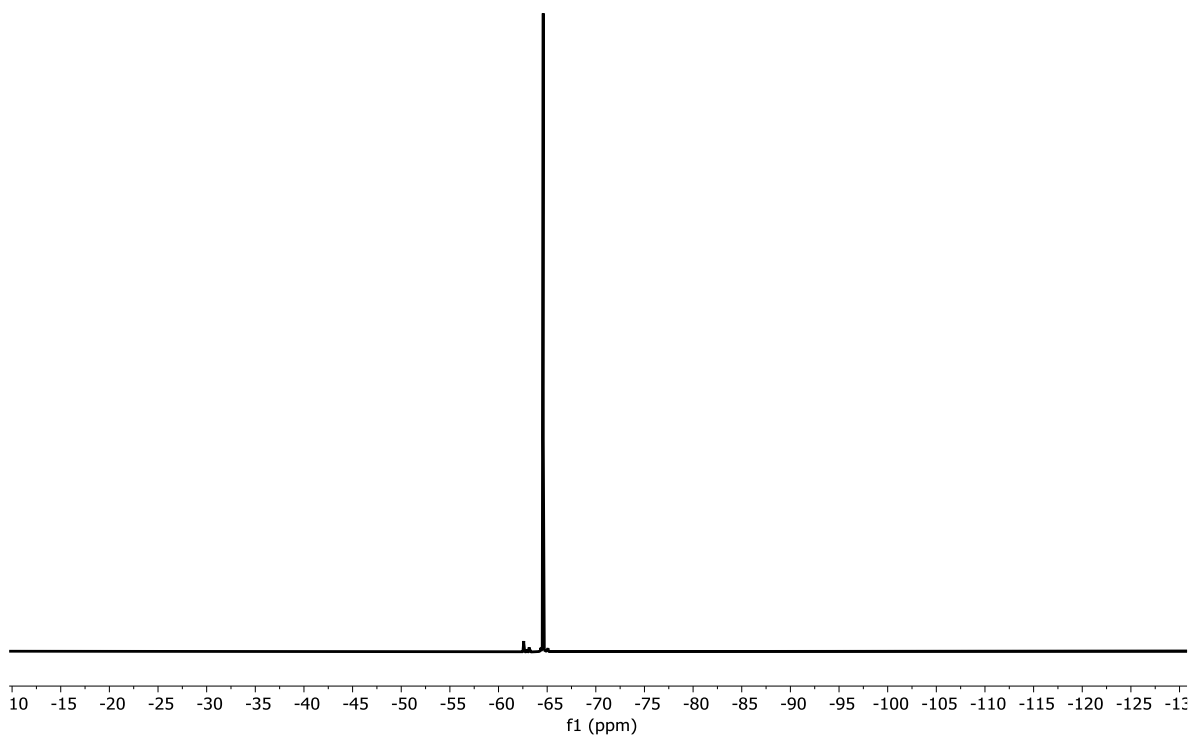

Figure S16 Detail of the  $^{19}\text{F-NMR}$  spectra of compound 3

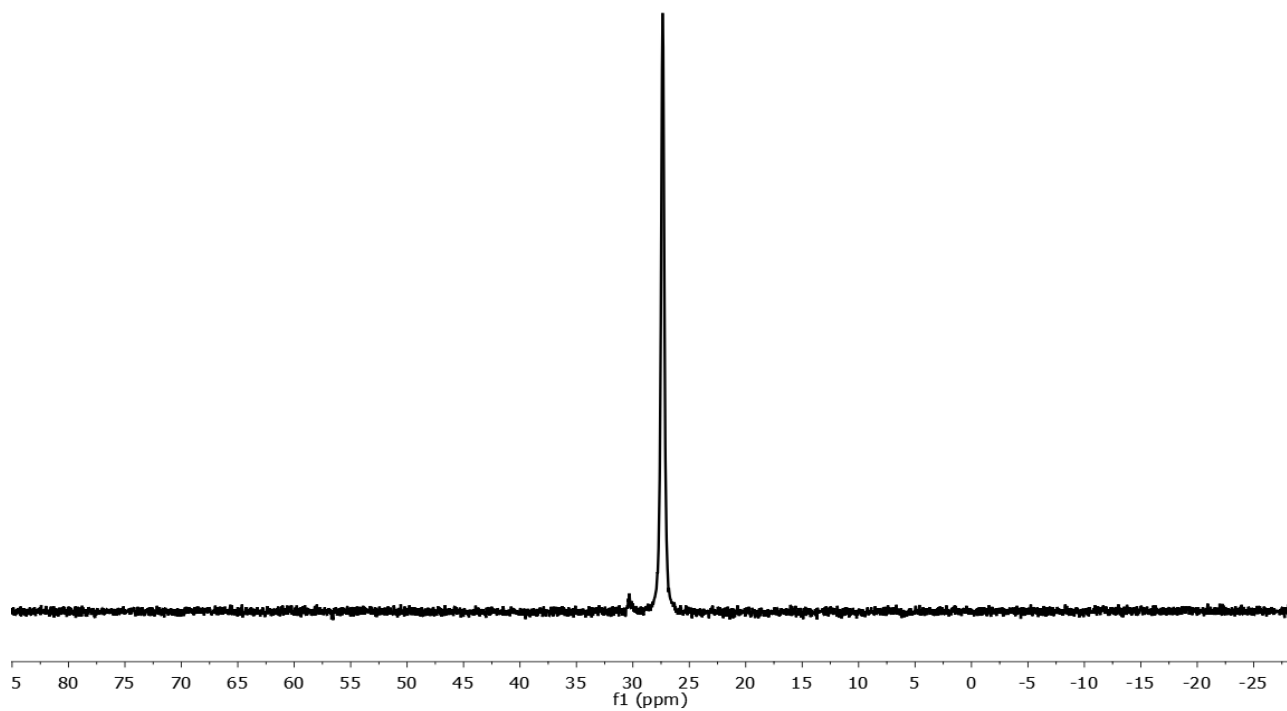

Figure S17 Detail of the  $^{31}\text{P}$ -NMR spectra of compound 3

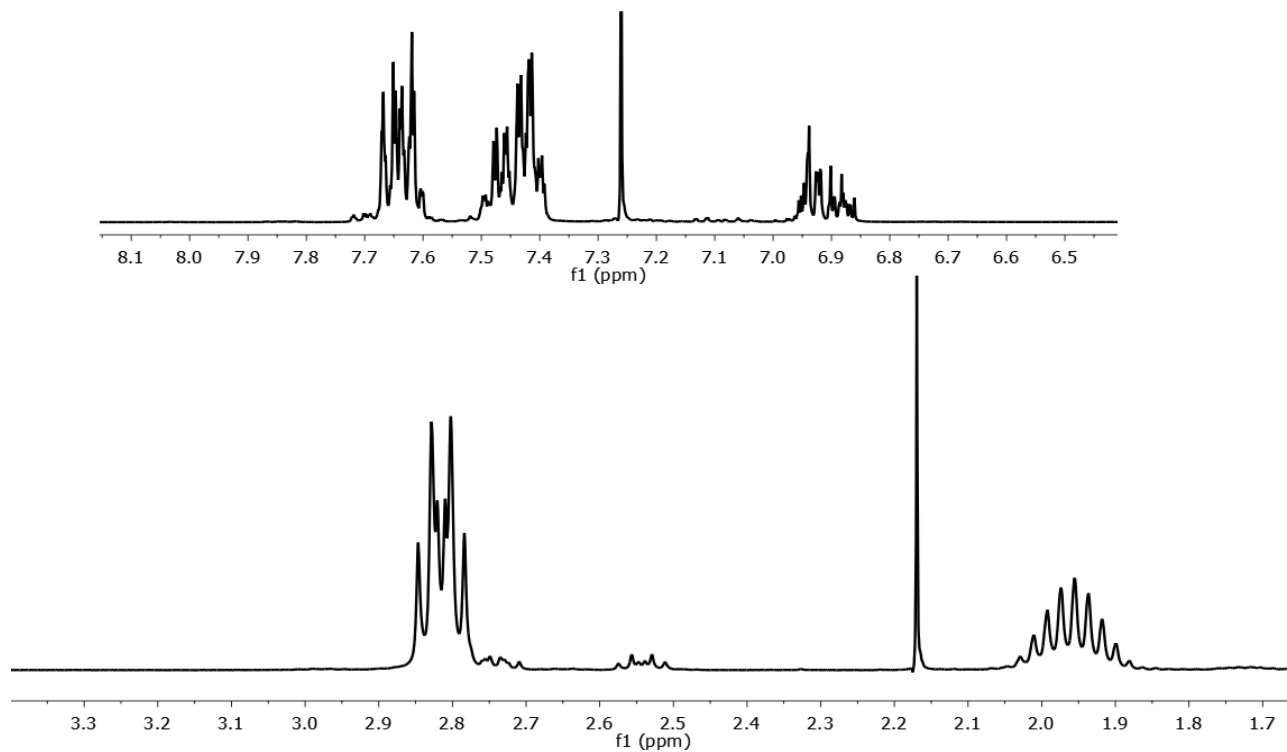

Figure S18 Detail of the  $^1\text{H}$ -NMR spectra of compound 4

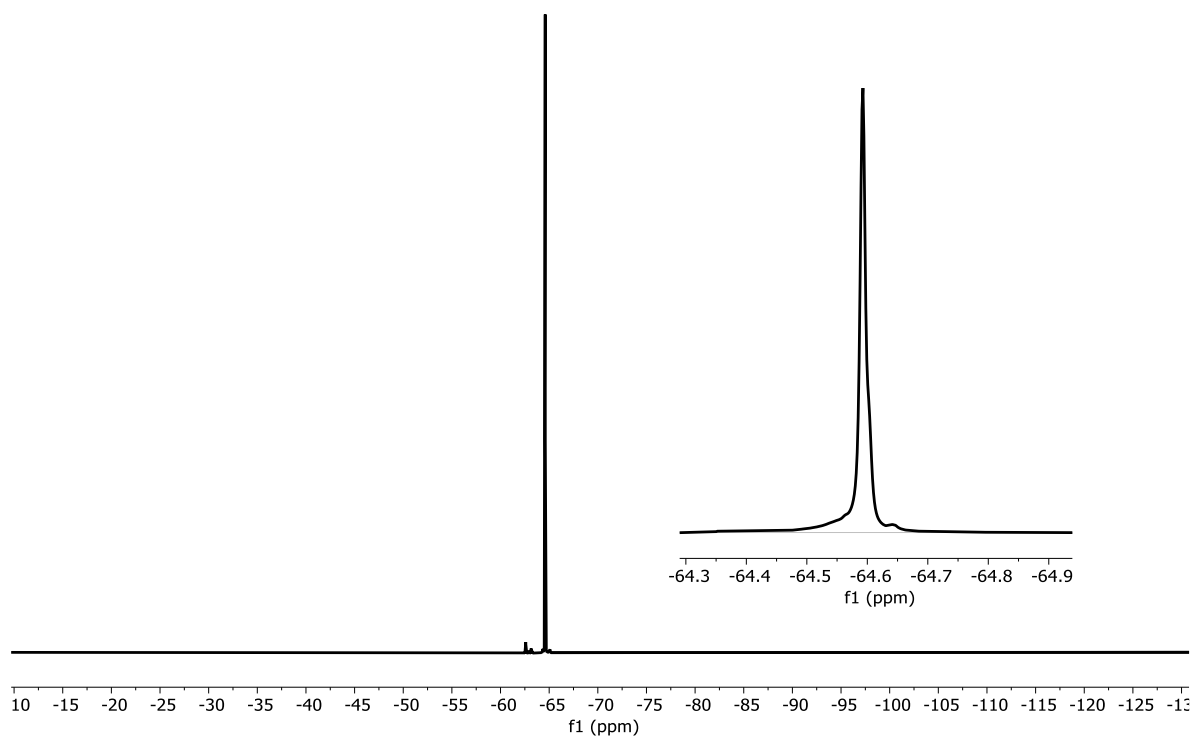

Figure S19 Detail of the  $^{19}\text{F}$ -NMR spectra of compound 4

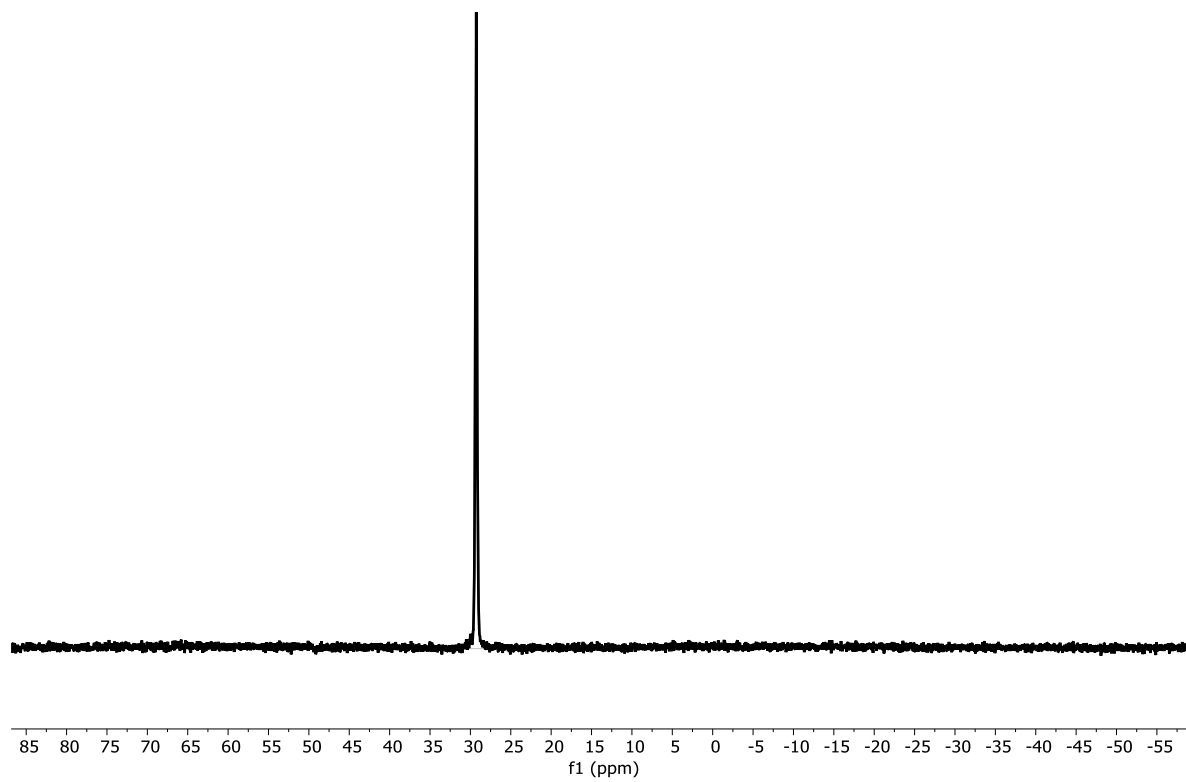

Figure S20 Detail of the  $^{31}\text{P}$ -NMR spectra of compound 4

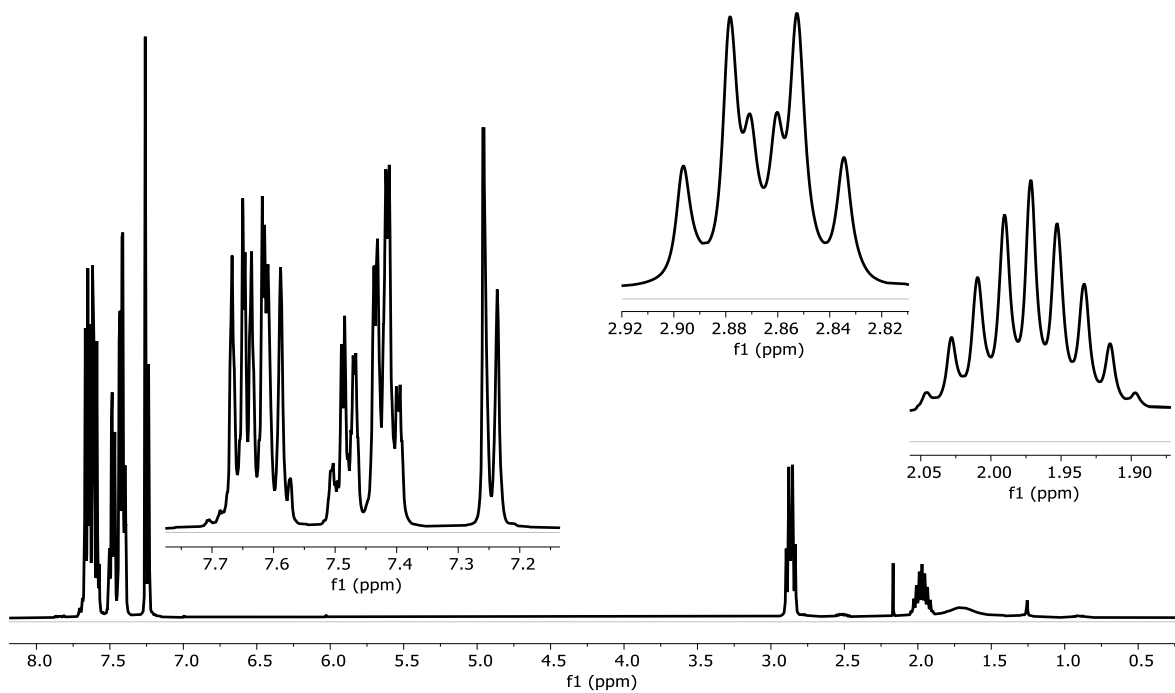

Figure S21 Detail of the  $^1\text{H-NMR}$  spectra of compound 5

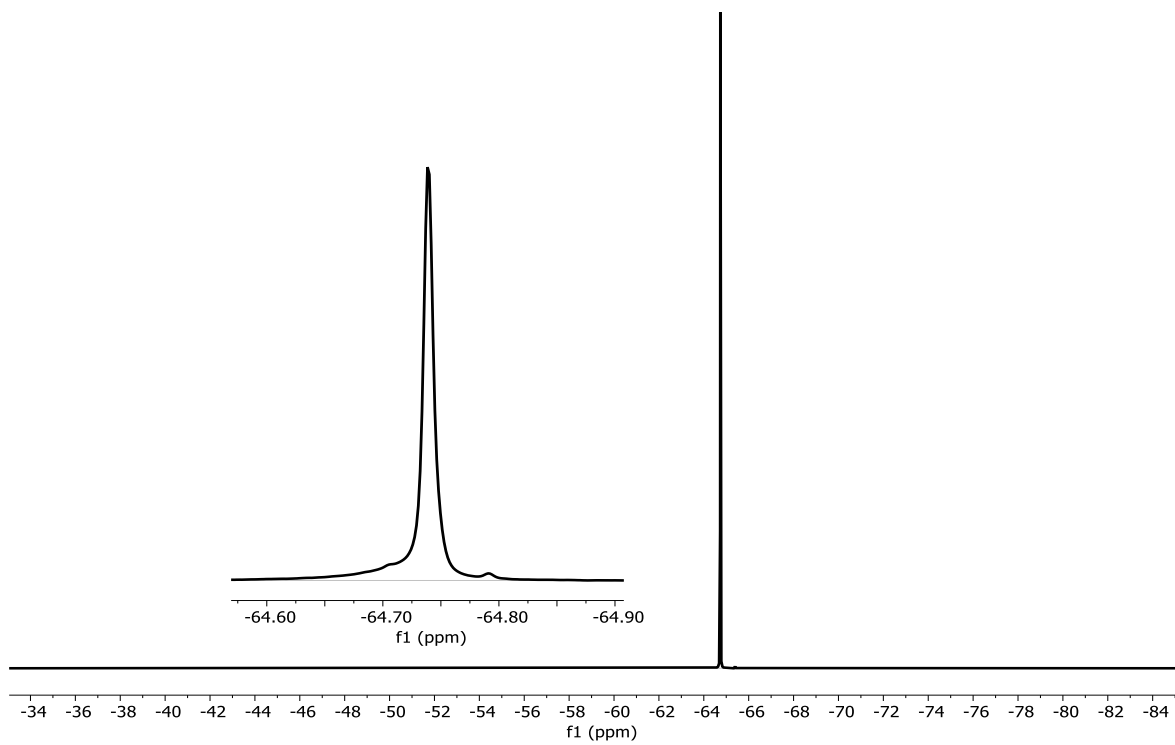

Figure S22 Detail of the  $^{19}\text{F-NMR}$  spectra of compound 5

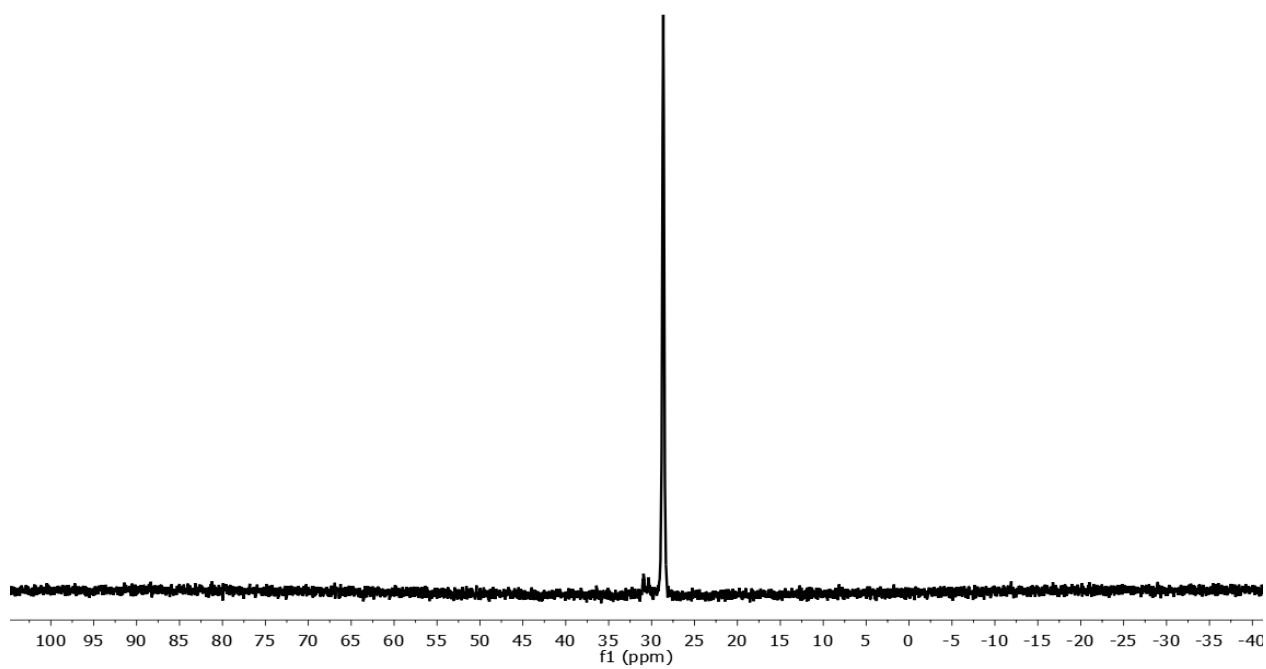

Figure S23 Detail of the  $^{31}\text{P}$ -NMR spectra of compound 5

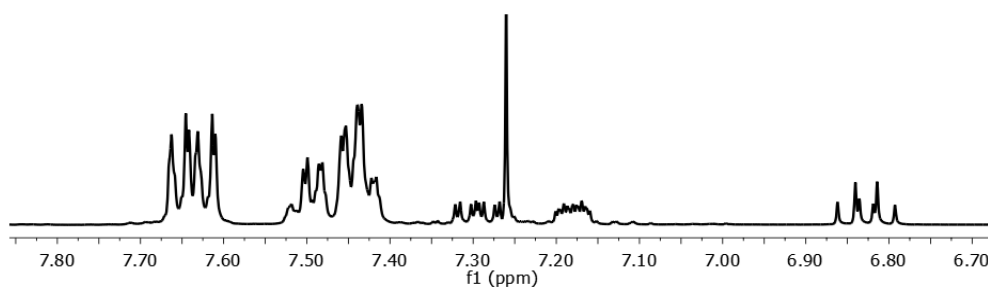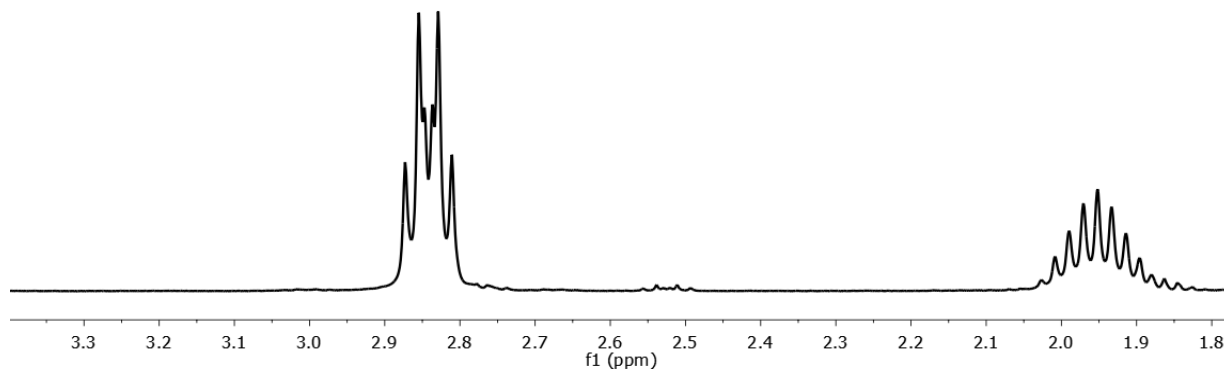

Figure S24 Detail of the  $^1\text{H}$ -NMR spectra of compound 6

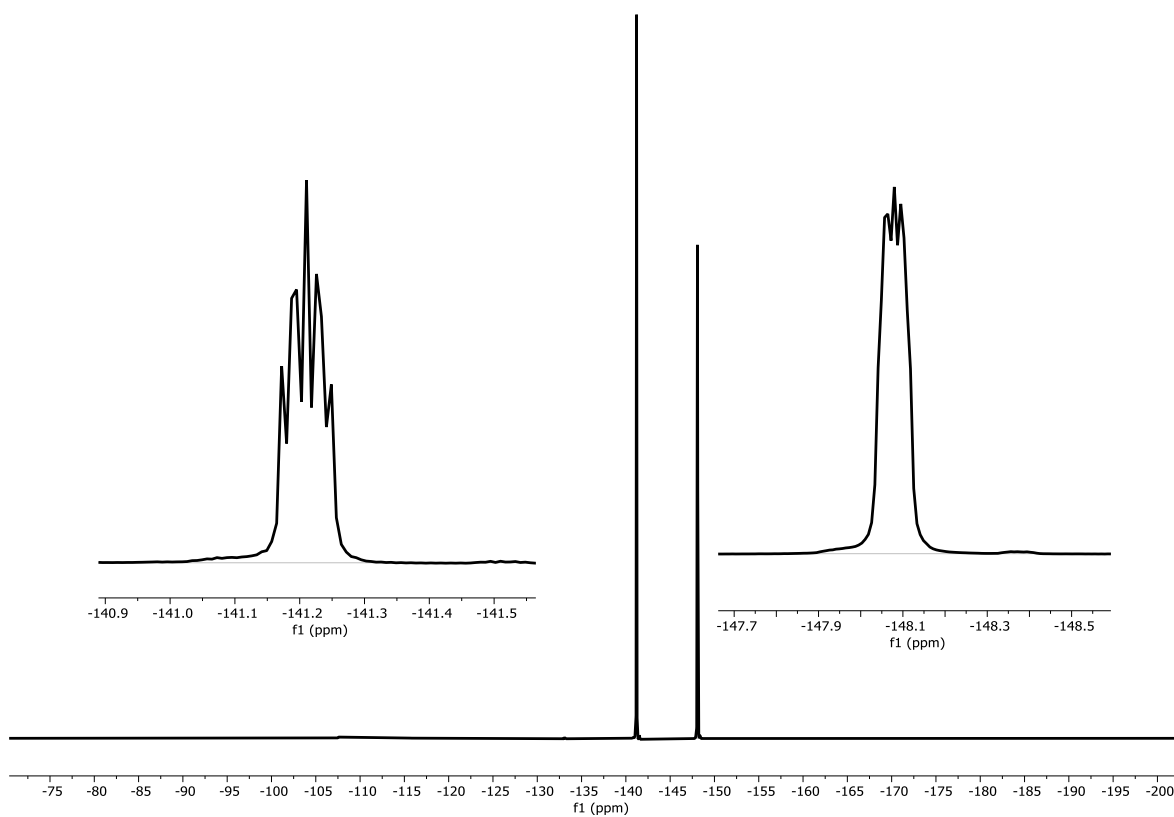

Figure S25 Detail of the  $^{19}\text{F}$ -NMR spectra of compound 6

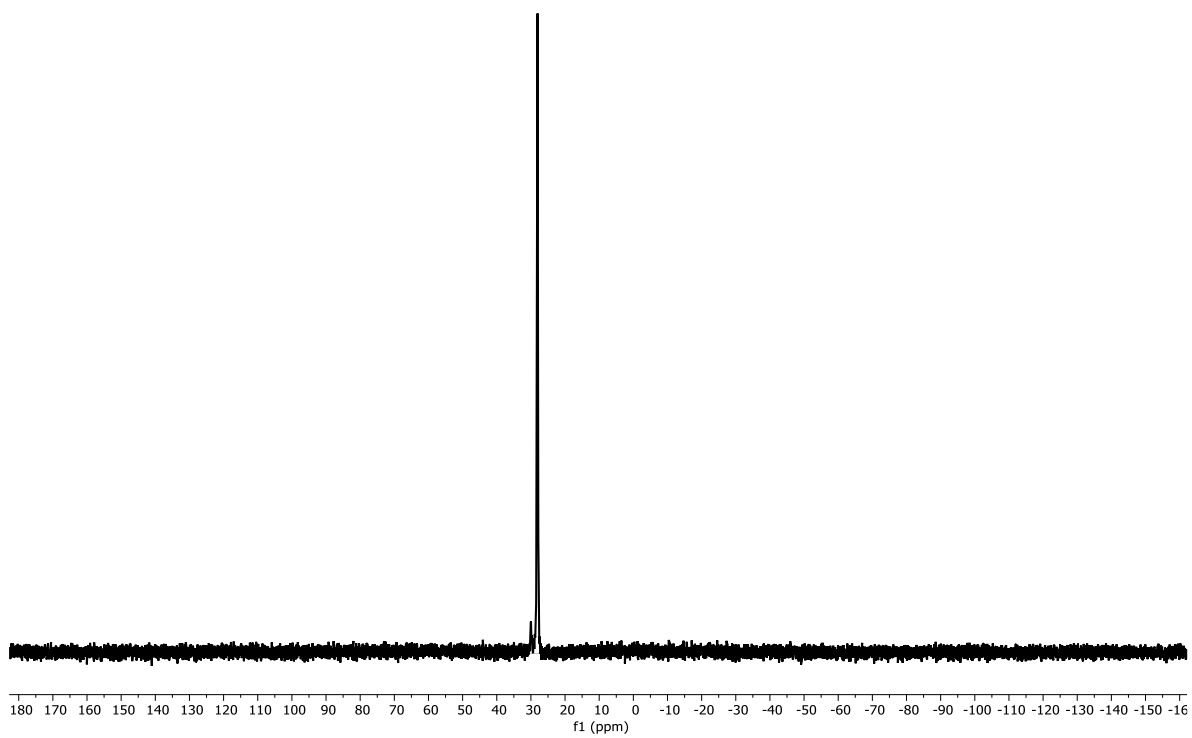

Figure S26 Detail of the  $^{31}\text{P}$ -NMR spectra of compound 6

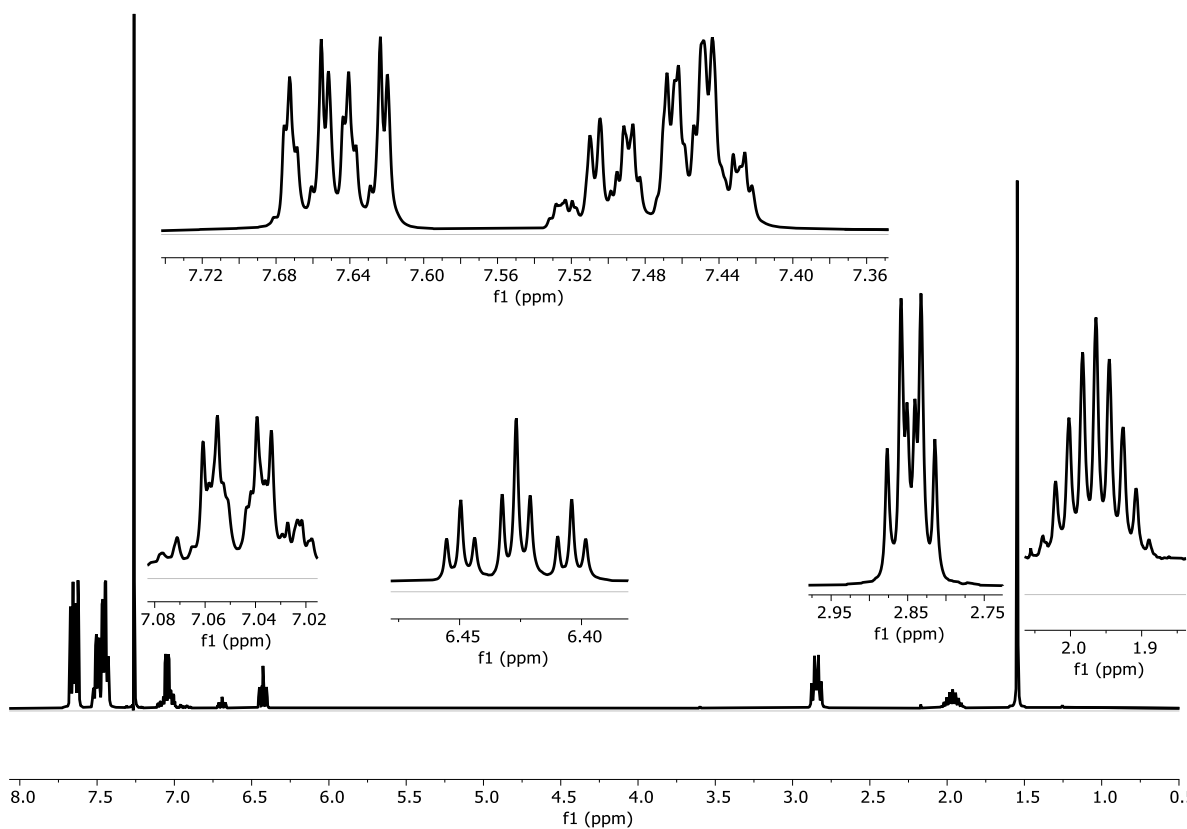

Figure S27 Detail of the  $^1\text{H-NMR}$  spectra of compound 7

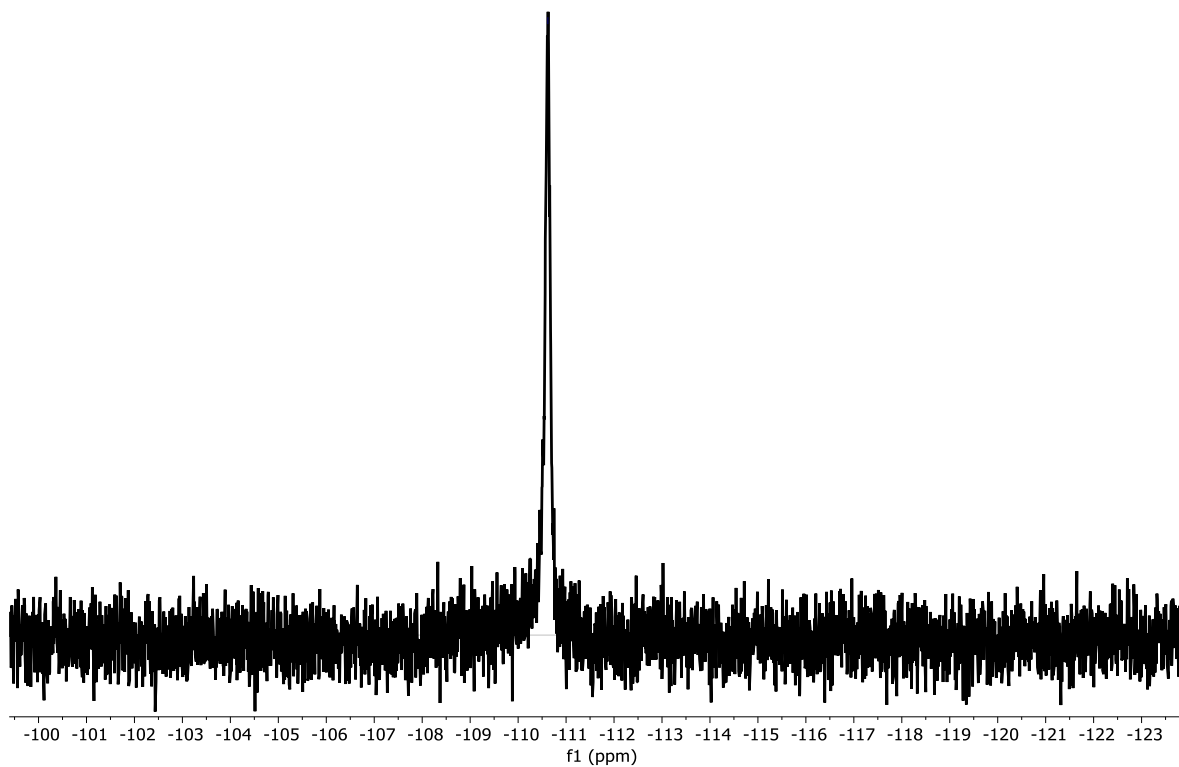

Figure S28 Detail of the  $^{19}\text{F-NMR}$  spectra of compound 7

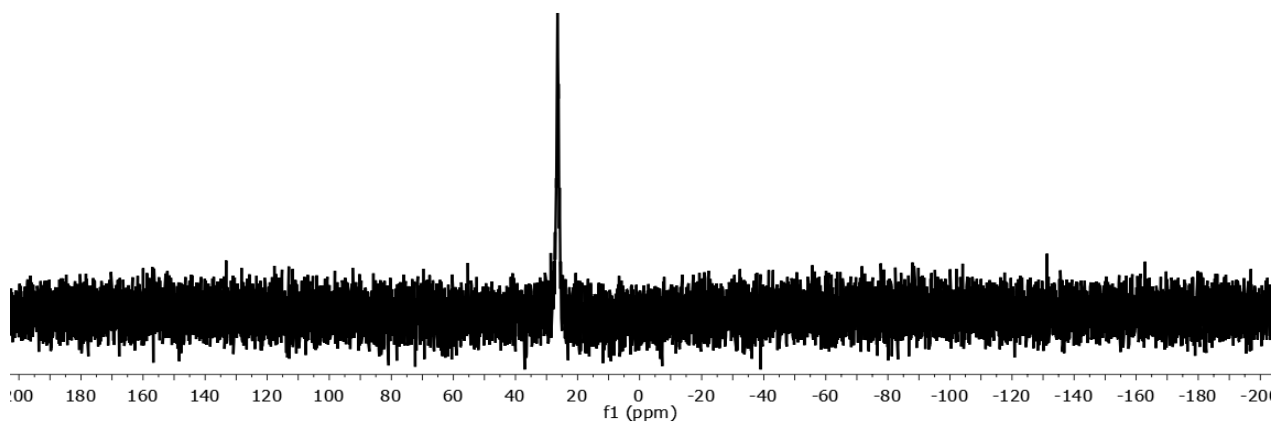

Figure S29 Detail of the  $^{31}\text{P}$ -NMR spectra of compound 7

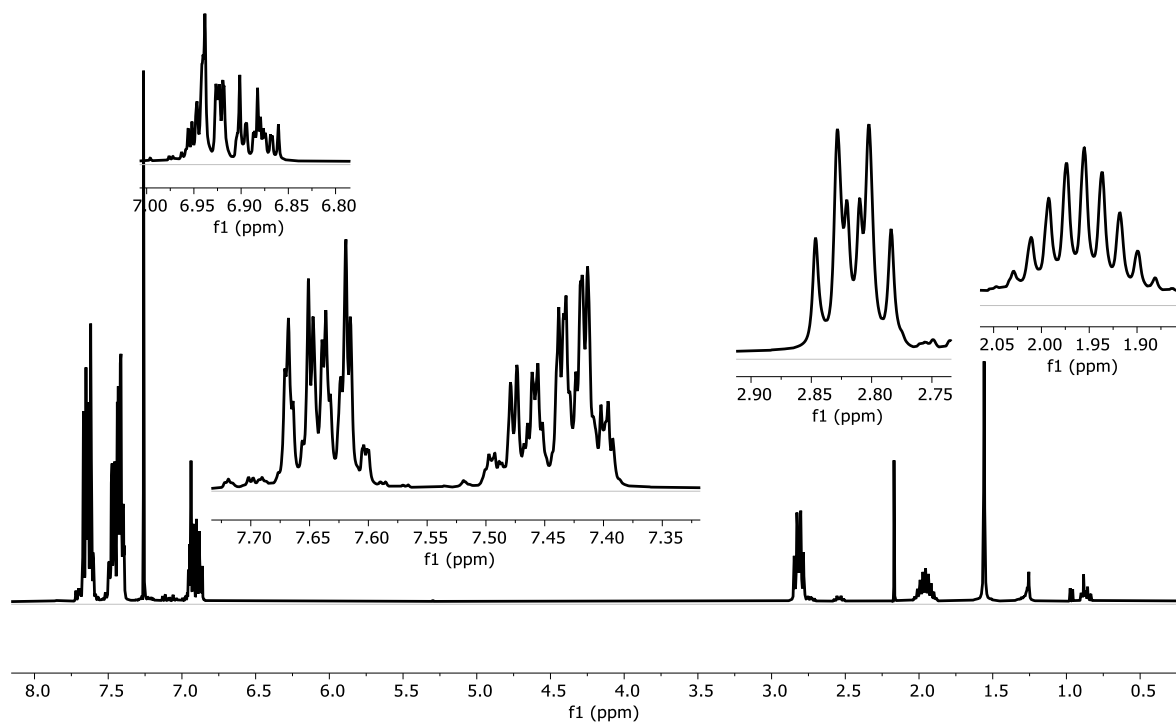

Figure S30 Detail of the  $^1\text{H}$ -NMR spectra of compound 8



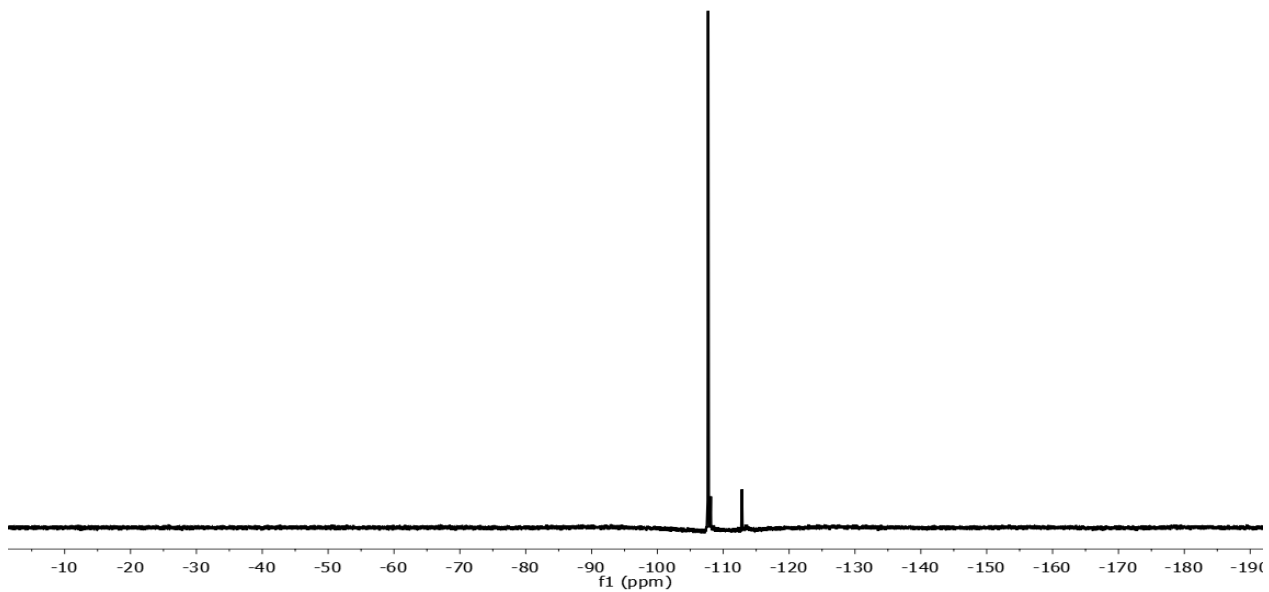

Figure S31 Detail of the  $^{19}\text{F}$ -NMR spectra of compound 8

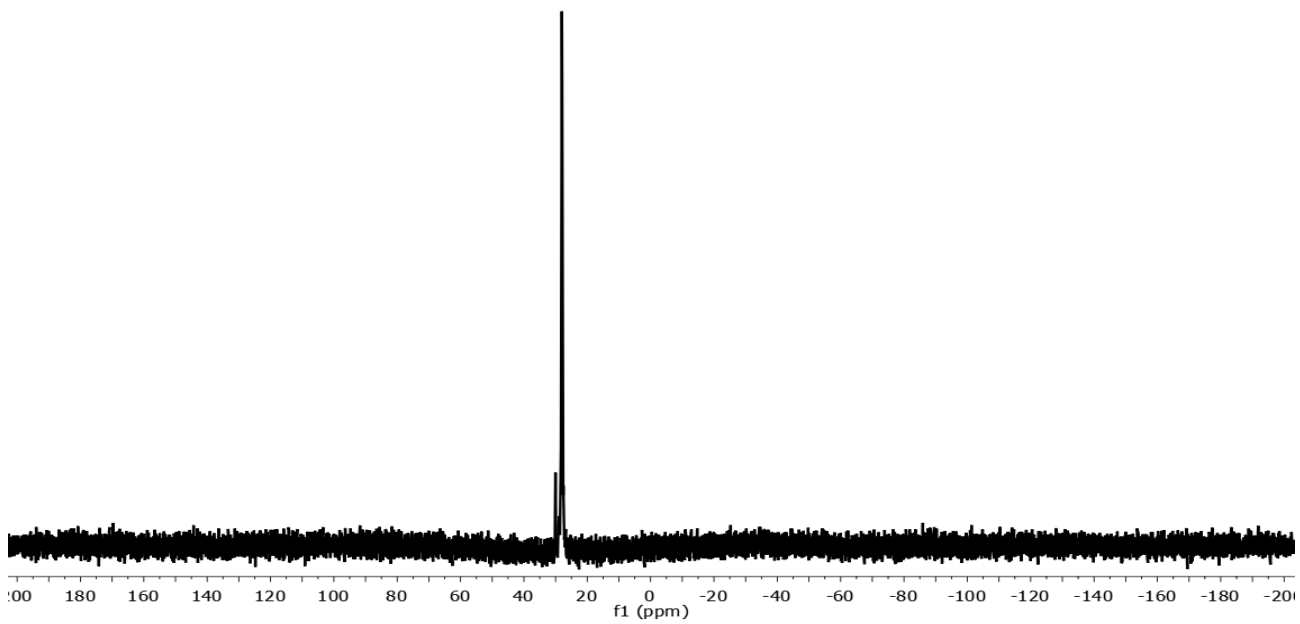

Figure S32 Detail of the  $^{31}\text{P}$ -NMR spectra of compound 8

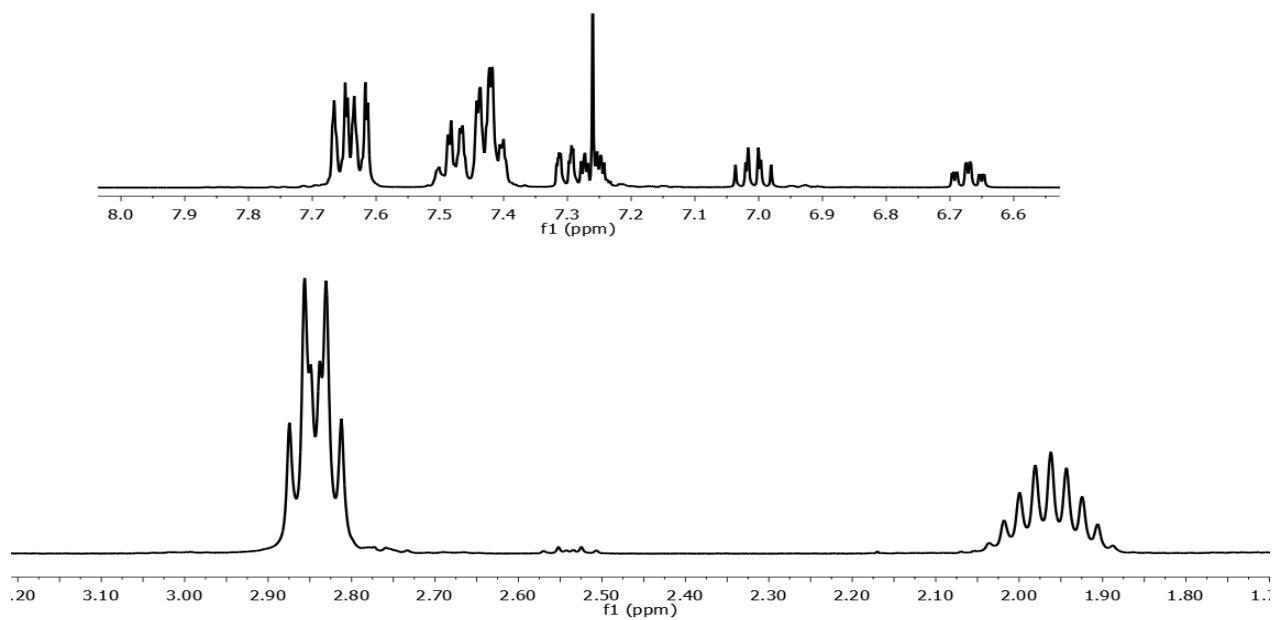

Figure S33 Detail of the  $^1\text{H}$ -NMR spectra of compound 9

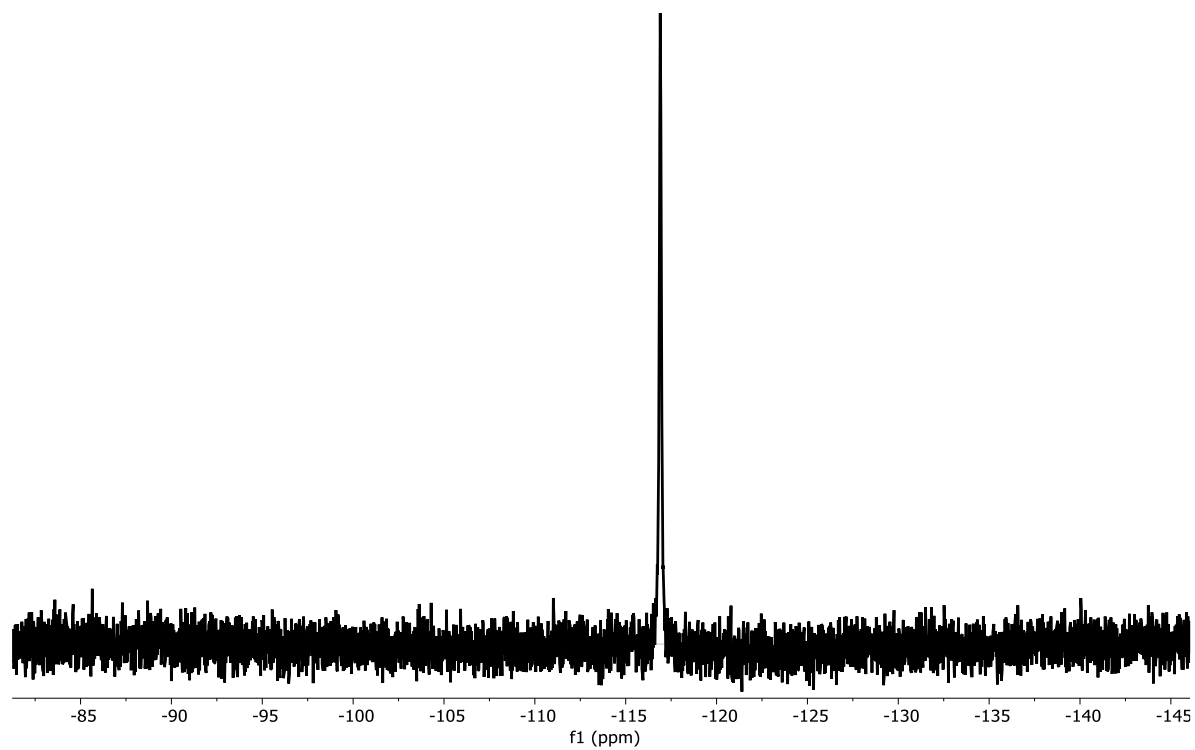

Figure S34 Detail of the  $^{19}\text{F}$ -NMR spectra of compound 9

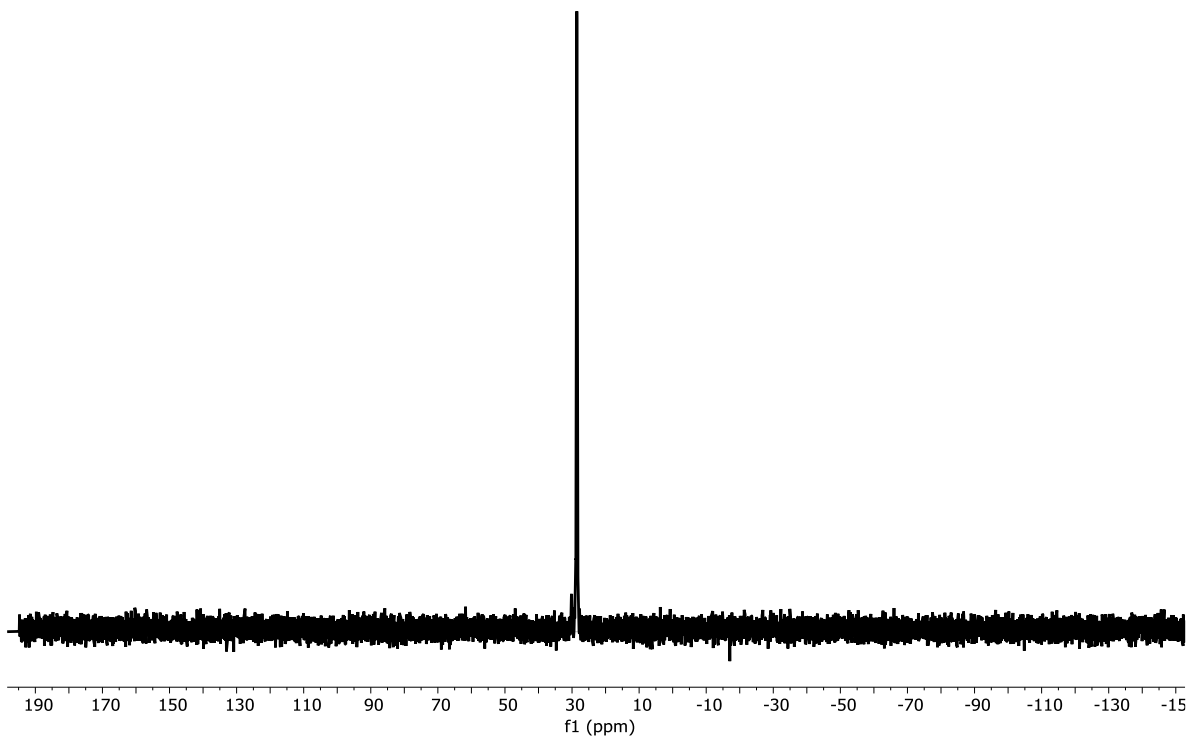

Figure S35 Detail of the  $^{31}\text{P}$ -NMR spectra of compound 9

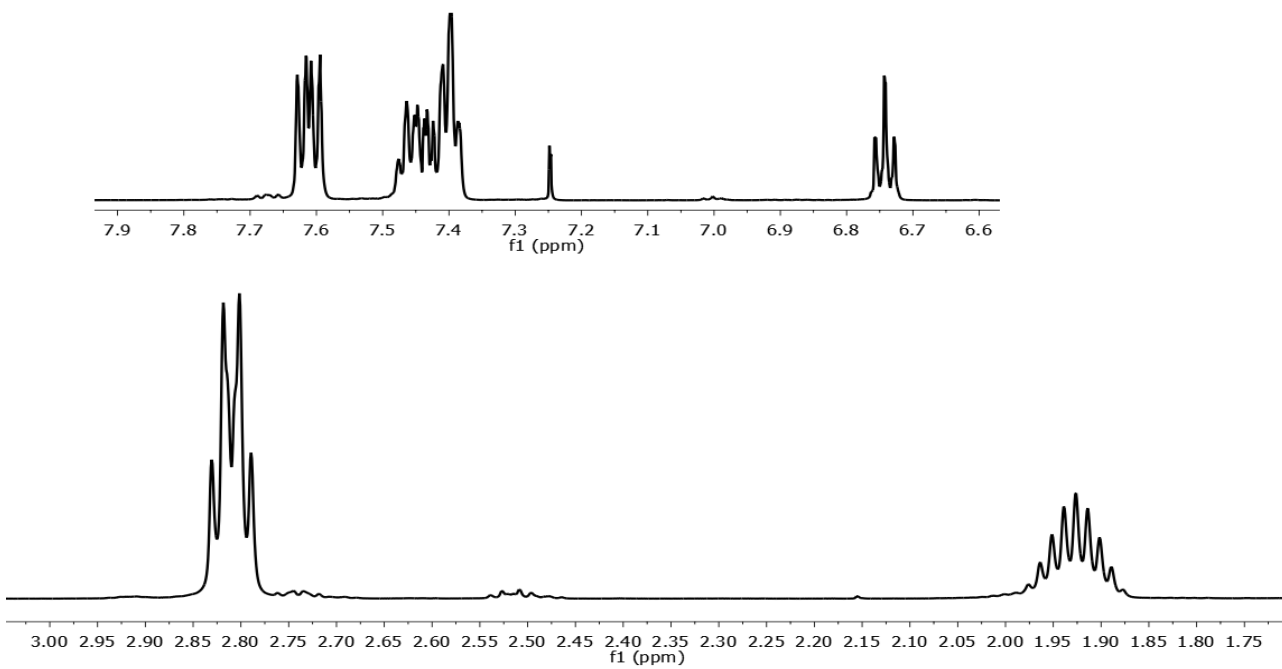

Figure S36 Detail of the  $^1\text{H}$ -NMR spectra of compound 10

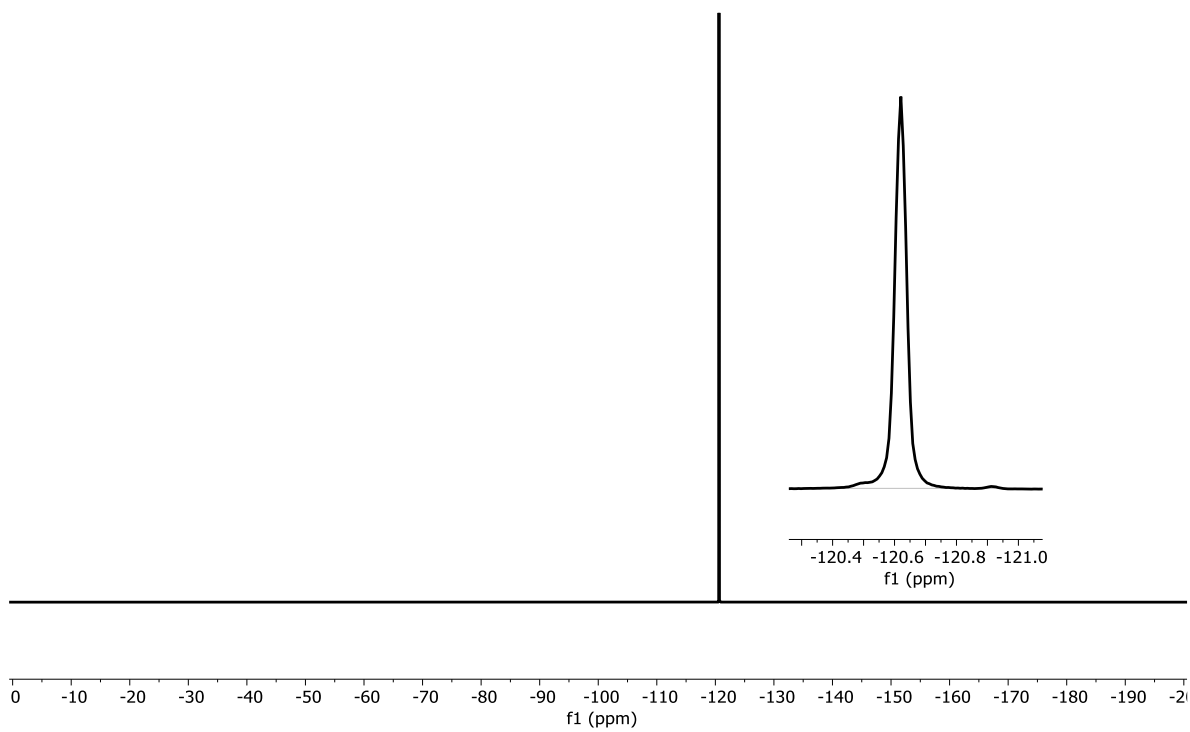

Figure S37 Detail of the  $^{19}\text{F}$ -NMR spectra of compound 10

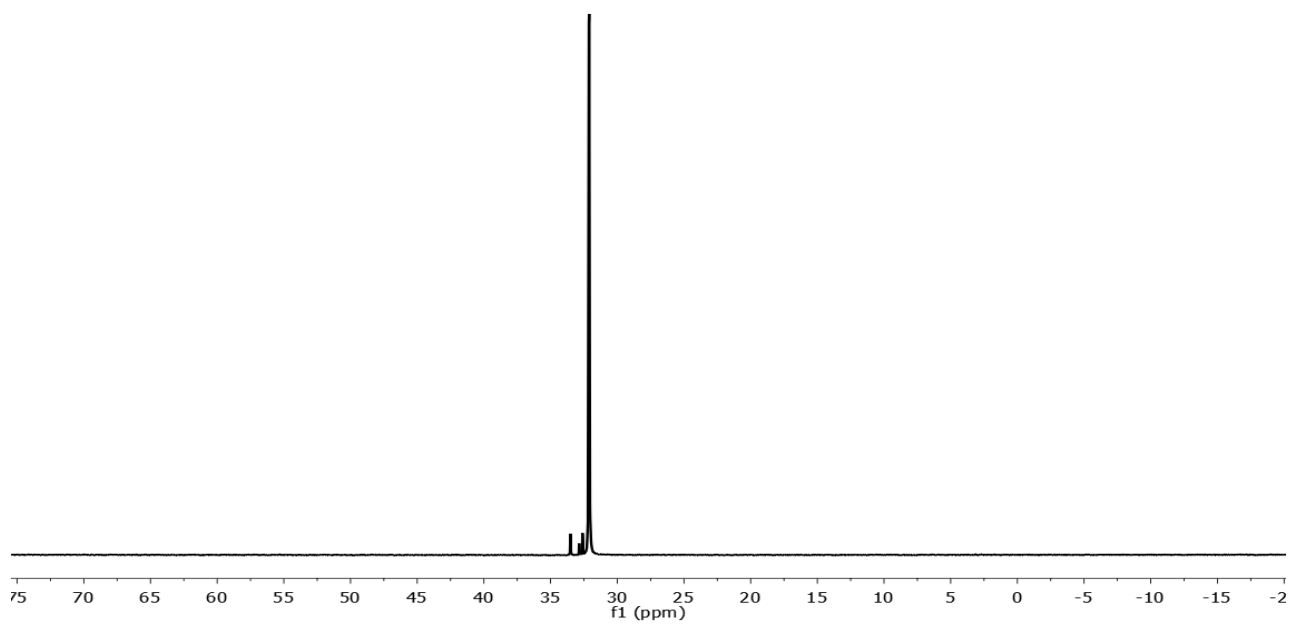

Figure S38 Detail of the  $^{31}\text{P}$ -NMR spectra of compound 10

# Crystallographic tables

Table S1. Crystal data and structure refinement for **1**.

|                                   |                                                                                               |                  |
|-----------------------------------|-----------------------------------------------------------------------------------------------|------------------|
| Identification code               | <b>1</b>                                                                                      |                  |
| Empirical formula                 | C <sub>39</sub> H <sub>26</sub> Au <sub>2</sub> F <sub>10</sub> P <sub>2</sub> S <sub>2</sub> |                  |
| Formula weight                    | 1204.59                                                                                       |                  |
| Temperature                       | 130(2) K                                                                                      |                  |
| Wavelength                        | 0.71073 Å                                                                                     |                  |
| Crystal system                    | Monoclinic                                                                                    |                  |
| Space group                       | P 21/c                                                                                        |                  |
| Unit cell dimensions              | a = 12.2219(5) Å                                                                              | α = 90°.         |
|                                   | b = 25.5328(7) Å                                                                              | β = 114.543(4)°. |
|                                   | c = 13.5337(5) Å                                                                              | γ = 90°.         |
| Volume                            | 3841.7(3) Å <sup>3</sup>                                                                      |                  |
| Z                                 | 4                                                                                             |                  |
| Density (calculated)              | 2.083 Mg/m <sup>3</sup>                                                                       |                  |
| Absorption coefficient            | 7.899 mm <sup>-1</sup>                                                                        |                  |
| F(000)                            | 2280                                                                                          |                  |
| Crystal size                      | 0.420 x 0.280 x 0.050 mm <sup>3</sup>                                                         |                  |
| Theta range for data collection   | 3.405 to 29.618°.                                                                             |                  |
| Index ranges                      | -16 ≤ h ≤ 16, -33 ≤ k ≤ 32, -17 ≤ l ≤ 18                                                      |                  |
| Reflections collected             | 67142                                                                                         |                  |
| Independent reflections           | 9883 [R(int) = 0.0694]                                                                        |                  |
| Completeness to theta = 25.242°   | 99.8 %                                                                                        |                  |
| Refinement method                 | Full-matrix least-squares on F <sup>2</sup>                                                   |                  |
| Data / restraints / parameters    | 9883 / 0 / 484                                                                                |                  |
| Goodness-of-fit on F <sup>2</sup> | 1.107                                                                                         |                  |
| Final R indices [I > 2σ(I)]       | R1 = 0.0423, wR2 = 0.0762                                                                     |                  |
| R indices (all data)              | R1 = 0.0646, wR2 = 0.0868                                                                     |                  |
| Largest diff. peak and hole       | 3.623 and -1.844 e.Å <sup>-3</sup>                                                            |                  |

Table S2. Atomic coordinates ( $\times 10^4$ ) and equivalent isotropic displacement parameters ( $\text{\AA}^2 \times 10^3$ ) for **1**.  $U(\text{eq})$  is defined as one third of the trace of the orthogonalized  $U^{ij}$  tensor.

|       | x        | y       | z        | U(eq) |
|-------|----------|---------|----------|-------|
| C(1)  | 6562(6)  | 3626(3) | 6188(6)  | 31(2) |
| C(2)  | 5951(9)  | 3192(4) | 6332(7)  | 47(2) |
| C(3)  | 4702(10) | 3187(5) | 5921(8)  | 64(3) |
| C(4)  | 4062(8)  | 3596(6) | 5363(9)  | 66(3) |
| C(5)  | 4619(8)  | 4032(4) | 5186(10) | 69(3) |
| C(6)  | 5861(7)  | 4040(3) | 5608(8)  | 50(2) |
| C(7)  | 7081(6)  | 3807(3) | 2536(5)  | 24(1) |
| C(8)  | 6544(7)  | 3514(4) | 1606(6)  | 40(2) |
| C(9)  | 5413(7)  | 3655(4) | 830(7)   | 52(2) |
| C(10) | 4842(8)  | 4086(4) | 988(8)   | 53(3) |
| C(11) | 5353(7)  | 4375(4) | 1907(9)  | 56(3) |
| C(12) | 6481(7)  | 4234(3) | 2690(7)  | 42(2) |
| C(13) | 9547(5)  | 4147(3) | 3426(5)  | 22(1) |
| C(14) | 10273(6) | 4460(3) | 4275(6)  | 29(2) |
| C(15) | 11046(7) | 4813(3) | 4131(6)  | 35(2) |
| C(16) | 11126(6) | 4855(3) | 3158(6)  | 35(2) |
| C(17) | 10406(7) | 4540(3) | 2299(6)  | 38(2) |
| C(18) | 9616(7)  | 4196(3) | 2434(6)  | 34(2) |
| C(19) | 9037(5)  | 3053(3) | 3217(5)  | 21(1) |
| C(20) | 7538(6)  | 1617(3) | 4336(5)  | 23(1) |
| C(21) | 8528(6)  | 1298(3) | 4553(5)  | 23(1) |
| C(22) | 8443(6)  | 777(3)  | 4293(5)  | 27(1) |
| C(23) | 7334(7)  | 551(3)  | 3745(6)  | 33(2) |
| C(24) | 6327(7)  | 850(3)  | 3488(6)  | 33(2) |
| C(25) | 6429(6)  | 1367(3) | 3768(5)  | 26(1) |
| C(26) | 12230(6) | 2351(3) | 7736(6)  | 30(1) |
| C(27) | 13382(6) | 2522(3) | 8376(6)  | 30(1) |
| C(28) | 14368(7) | 2215(3) | 8476(7)  | 40(2) |
| C(29) | 14193(7) | 1749(4) | 7937(7)  | 46(2) |
| C(30) | 13035(8) | 1572(4) | 7302(8)  | 59(3) |
| C(31) | 12063(7) | 1880(3) | 7213(7)  | 45(2) |
| C(32) | 11403(5) | 3418(3) | 7682(5)  | 25(1) |
| C(33) | 11239(7) | 3772(3) | 8383(6)  | 34(2) |
| C(34) | 11576(7) | 4291(3) | 8400(7)  | 43(2) |
| C(35) | 12099(7) | 4458(3) | 7733(7)  | 43(2) |
| C(36) | 12276(7) | 4112(3) | 7036(7)  | 41(2) |
| C(37) | 11929(6) | 3593(3) | 6997(6)  | 32(2) |

|       |          |         |         |        |
|-------|----------|---------|---------|--------|
| C(38) | 10718(6) | 2634(3) | 8837(5) | 21(1)  |
| C(39) | 10346(6) | 2071(3) | 8973(5) | 25(1)  |
| Au(1) | 8472(1)  | 3653(1) | 5231(1) | 22(1)  |
| Au(2) | 9278(1)  | 2530(1) | 6072(1) | 21(1)  |
| F(1)  | 6551(6)  | 2778(2) | 6873(4) | 77(2)  |
| F(2)  | 4144(7)  | 2765(3) | 6066(5) | 110(3) |
| F(3)  | 2848(5)  | 3593(3) | 4953(6) | 107(3) |
| F(4)  | 3993(5)  | 4439(3) | 4592(8) | 128(4) |
| F(5)  | 6384(5)  | 4461(2) | 5401(6) | 78(2)  |
| F(6)  | 9648(3)  | 1495(2) | 5077(3) | 33(1)  |
| F(7)  | 9439(4)  | 493(2)  | 4517(3) | 38(1)  |
| F(8)  | 7249(4)  | 41(2)   | 3462(4) | 51(1)  |
| F(9)  | 5229(4)  | 640(2)  | 2925(4) | 52(1)  |
| F(10) | 5407(3)  | 1649(2) | 3473(3) | 35(1)  |
| P(1)  | 8561(1)  | 3663(1) | 3601(1) | 19(1)  |
| P(2)  | 10927(1) | 2739(1) | 7588(1) | 21(1)  |
| S(1)  | 8152(2)  | 3653(1) | 6796(1) | 31(1)  |
| S(2)  | 7535(2)  | 2289(1) | 4609(1) | 26(1)  |

---

Table S3. Bond lengths [Å] and angles [°] for 1.

|               |           |              |           |
|---------------|-----------|--------------|-----------|
| C(1)-C(6)     | 1.383(11) | C(19)-H(19B) | 0.9900    |
| C(1)-C(2)     | 1.394(11) | C(20)-C(21)  | 1.384(9)  |
| C(1)-S(1)     | 1.769(7)  | C(20)-C(25)  | 1.404(9)  |
| C(2)-F(1)     | 1.321(11) | C(20)-S(2)   | 1.757(7)  |
| C(2)-C(3)     | 1.390(14) | C(21)-F(6)   | 1.349(7)  |
| C(3)-F(2)     | 1.335(11) | C(21)-C(22)  | 1.369(9)  |
| C(3)-C(4)     | 1.335(16) | C(22)-F(7)   | 1.341(8)  |
| C(4)-F(3)     | 1.351(10) | C(22)-C(23)  | 1.373(10) |
| C(4)-C(5)     | 1.376(16) | C(23)-F(8)   | 1.349(8)  |
| C(5)-F(4)     | 1.343(13) | C(23)-C(24)  | 1.366(10) |
| C(5)-C(6)     | 1.382(11) | C(24)-F(9)   | 1.348(8)  |
| C(6)-F(5)     | 1.338(10) | C(24)-C(25)  | 1.364(10) |
| C(7)-C(8)     | 1.374(10) | C(25)-F(10)  | 1.349(8)  |
| C(7)-C(12)    | 1.377(10) | C(26)-C(31)  | 1.368(11) |
| C(7)-P(1)     | 1.822(7)  | C(26)-C(27)  | 1.382(9)  |
| C(8)-C(9)     | 1.392(11) | C(26)-P(2)   | 1.815(7)  |
| C(8)-H(8)     | 0.9500    | C(27)-C(28)  | 1.396(10) |
| C(9)-C(10)    | 1.366(14) | C(27)-H(27)  | 0.9500    |
| C(9)-H(9)     | 0.9500    | C(28)-C(29)  | 1.366(12) |
| C(10)-C(11)   | 1.356(14) | C(28)-H(28)  | 0.9500    |
| C(10)-H(10)   | 0.9500    | C(29)-C(30)  | 1.392(12) |
| C(11)-C(12)   | 1.393(11) | C(29)-H(29)  | 0.9500    |
| C(11)-H(11)   | 0.9500    | C(30)-C(31)  | 1.388(11) |
| C(12)-H(12)   | 0.9500    | C(30)-H(30)  | 0.9500    |
| C(13)-C(14)   | 1.377(9)  | C(31)-H(31)  | 0.9500    |
| C(13)-C(18)   | 1.386(9)  | C(32)-C(33)  | 1.385(10) |
| C(13)-P(1)    | 1.808(7)  | C(32)-C(37)  | 1.402(9)  |
| C(14)-C(15)   | 1.377(10) | C(32)-P(2)   | 1.817(7)  |
| C(14)-H(14)   | 0.9500    | C(33)-C(34)  | 1.384(10) |
| C(15)-C(16)   | 1.365(10) | C(33)-H(33)  | 0.9500    |
| C(15)-H(15)   | 0.9500    | C(34)-C(35)  | 1.372(11) |
| C(16)-C(17)   | 1.386(11) | C(34)-H(34)  | 0.9500    |
| C(16)-H(16)   | 0.9500    | C(35)-C(36)  | 1.374(12) |
| C(17)-C(18)   | 1.374(10) | C(35)-H(35)  | 0.9500    |
| C(17)-H(17)   | 0.9500    | C(36)-C(37)  | 1.387(11) |
| C(18)-H(18)   | 0.9500    | C(36)-H(36)  | 0.9500    |
| C(19)-C(39)#1 | 1.533(8)  | C(37)-H(37)  | 0.9500    |
| C(19)-P(1)    | 1.812(6)  | C(38)-C(39)  | 1.540(9)  |
| C(19)-H(19A)  | 0.9900    | C(38)-P(2)   | 1.832(6)  |



|                   |            |
|-------------------|------------|
| C(38)-H(38A)      | 0.9900     |
| C(38)-H(38B)      | 0.9900     |
| C(39)-C(19)#2     | 1.533(8)   |
| C(39)-H(39A)      | 0.9900     |
| C(39)-H(39B)      | 0.9900     |
| Au(1)-P(1)        | 2.2535(16) |
| Au(1)-S(1)        | 2.3085(17) |
| Au(1)-Au(2)       | 3.0923(4)  |
| Au(2)-P(2)        | 2.2629(17) |
| Au(2)-S(2)        | 2.3085(17) |
|                   |            |
| C(6)-C(1)-C(2)    | 116.5(8)   |
| C(6)-C(1)-S(1)    | 122.4(6)   |
| C(2)-C(1)-S(1)    | 121.0(7)   |
| F(1)-C(2)-C(3)    | 118.6(9)   |
| F(1)-C(2)-C(1)    | 120.5(8)   |
| C(3)-C(2)-C(1)    | 120.9(10)  |
| F(2)-C(3)-C(4)    | 120.0(11)  |
| F(2)-C(3)-C(2)    | 119.4(12)  |
| C(4)-C(3)-C(2)    | 120.5(9)   |
| C(3)-C(4)-F(3)    | 120.9(11)  |
| C(3)-C(4)-C(5)    | 120.9(9)   |
| F(3)-C(4)-C(5)    | 118.2(12)  |
| F(4)-C(5)-C(4)    | 122.0(9)   |
| F(4)-C(5)-C(6)    | 119.3(10)  |
| C(4)-C(5)-C(6)    | 118.7(11)  |
| F(5)-C(6)-C(5)    | 117.7(9)   |
| F(5)-C(6)-C(1)    | 119.8(7)   |
| C(5)-C(6)-C(1)    | 122.5(9)   |
| C(8)-C(7)-C(12)   | 119.2(7)   |
| C(8)-C(7)-P(1)    | 123.7(5)   |
| C(12)-C(7)-P(1)   | 117.1(6)   |
| C(7)-C(8)-C(9)    | 119.8(8)   |
| C(7)-C(8)-H(8)    | 120.1      |
| C(9)-C(8)-H(8)    | 120.1      |
| C(10)-C(9)-C(8)   | 120.2(9)   |
| C(10)-C(9)-H(9)   | 119.9      |
| C(8)-C(9)-H(9)    | 119.9      |
| C(11)-C(10)-C(9)  | 120.8(8)   |
| C(11)-C(10)-H(10) | 119.6      |
| C(9)-C(10)-H(10)  | 119.6      |
| C(10)-C(11)-C(12) | 119.4(9)   |

|                      |          |
|----------------------|----------|
| C(10)-C(11)-H(11)    | 120.3    |
| C(12)-C(11)-H(11)    | 120.3    |
| C(7)-C(12)-C(11)     | 120.7(8) |
| C(7)-C(12)-H(12)     | 119.7    |
| C(11)-C(12)-H(12)    | 119.7    |
| C(14)-C(13)-C(18)    | 118.6(6) |
| C(14)-C(13)-P(1)     | 121.4(5) |
| C(18)-C(13)-P(1)     | 120.0(5) |
| C(13)-C(14)-C(15)    | 120.2(7) |
| C(13)-C(14)-H(14)    | 119.9    |
| C(15)-C(14)-H(14)    | 119.9    |
| C(16)-C(15)-C(14)    | 121.1(7) |
| C(16)-C(15)-H(15)    | 119.5    |
| C(14)-C(15)-H(15)    | 119.5    |
| C(15)-C(16)-C(17)    | 119.3(7) |
| C(15)-C(16)-H(16)    | 120.4    |
| C(17)-C(16)-H(16)    | 120.4    |
| C(18)-C(17)-C(16)    | 119.7(7) |
| C(18)-C(17)-H(17)    | 120.1    |
| C(16)-C(17)-H(17)    | 120.1    |
| C(17)-C(18)-C(13)    | 121.0(7) |
| C(17)-C(18)-H(18)    | 119.5    |
| C(13)-C(18)-H(18)    | 119.5    |
| C(39)#1-C(19)-P(1)   | 110.9(4) |
| C(39)#1-C(19)-H(19A) | 109.5    |
| P(1)-C(19)-H(19A)    | 109.5    |
| C(39)#1-C(19)-H(19B) | 109.5    |
| P(1)-C(19)-H(19B)    | 109.5    |
| H(19A)-C(19)-H(19B)  | 108.0    |
| C(21)-C(20)-C(25)    | 114.2(6) |
| C(21)-C(20)-S(2)     | 127.4(5) |
| C(25)-C(20)-S(2)     | 118.2(5) |
| F(6)-C(21)-C(22)     | 116.7(6) |
| F(6)-C(21)-C(20)     | 119.9(6) |
| C(22)-C(21)-C(20)    | 123.3(6) |
| F(7)-C(22)-C(21)     | 120.2(6) |
| F(7)-C(22)-C(23)     | 119.6(6) |
| C(21)-C(22)-C(23)    | 120.1(6) |
| F(8)-C(23)-C(24)     | 120.9(7) |
| F(8)-C(23)-C(22)     | 120.2(7) |
| C(24)-C(23)-C(22)    | 118.9(7) |
| F(9)-C(24)-C(25)     | 119.7(7) |

|                   |          |
|-------------------|----------|
| F(9)-C(24)-C(23)  | 120.1(7) |
| C(25)-C(24)-C(23) | 120.2(7) |
| F(10)-C(25)-C(24) | 117.8(6) |
| F(10)-C(25)-C(20) | 119.0(6) |
| C(24)-C(25)-C(20) | 123.2(7) |
| C(31)-C(26)-C(27) | 119.8(7) |
| C(31)-C(26)-P(2)  | 119.1(5) |
| C(27)-C(26)-P(2)  | 121.1(6) |
| C(26)-C(27)-C(28) | 119.8(7) |
| C(26)-C(27)-H(27) | 120.1    |
| C(28)-C(27)-H(27) | 120.1    |
| C(29)-C(28)-C(27) | 120.0(7) |
| C(29)-C(28)-H(28) | 120.0    |
| C(27)-C(28)-H(28) | 120.0    |
| C(28)-C(29)-C(30) | 120.4(8) |
| C(28)-C(29)-H(29) | 119.8    |
| C(30)-C(29)-H(29) | 119.8    |
| C(31)-C(30)-C(29) | 118.9(9) |
| C(31)-C(30)-H(30) | 120.5    |
| C(29)-C(30)-H(30) | 120.5    |
| C(26)-C(31)-C(30) | 121.0(8) |
| C(26)-C(31)-H(31) | 119.5    |
| C(30)-C(31)-H(31) | 119.5    |
| C(33)-C(32)-C(37) | 118.8(7) |
| C(33)-C(32)-P(2)  | 122.6(5) |
| C(37)-C(32)-P(2)  | 118.6(6) |
| C(34)-C(33)-C(32) | 120.6(7) |
| C(34)-C(33)-H(33) | 119.7    |
| C(32)-C(33)-H(33) | 119.7    |
| C(35)-C(34)-C(33) | 120.2(8) |
| C(35)-C(34)-H(34) | 119.9    |
| C(33)-C(34)-H(34) | 119.9    |
| C(34)-C(35)-C(36) | 120.0(8) |
| C(34)-C(35)-H(35) | 120.0    |
| C(36)-C(35)-H(35) | 120.0    |
| C(35)-C(36)-C(37) | 120.6(7) |
| C(35)-C(36)-H(36) | 119.7    |

|                      |           |
|----------------------|-----------|
| C(37)-C(36)-H(36)    | 119.7     |
| C(36)-C(37)-C(32)    | 119.7(7)  |
| C(36)-C(37)-H(37)    | 120.1     |
| C(32)-C(37)-H(37)    | 120.1     |
| C(39)-C(38)-P(2)     | 114.1(4)  |
| C(39)-C(38)-H(38A)   | 108.7     |
| P(2)-C(38)-H(38A)    | 108.7     |
| C(39)-C(38)-H(38B)   | 108.7     |
| P(2)-C(38)-H(38B)    | 108.7     |
| H(38A)-C(38)-H(38B)  | 107.6     |
| C(19)#2-C(39)-C(38)  | 113.1(5)  |
| C(19)#2-C(39)-H(39A) | 109.0     |
| C(38)-C(39)-H(39A)   | 109.0     |
| C(19)#2-C(39)-H(39B) | 109.0     |
| C(38)-C(39)-H(39B)   | 109.0     |
| H(39A)-C(39)-H(39B)  | 107.8     |
| P(1)-Au(1)-S(1)      | 173.59(6) |
| P(1)-Au(1)-Au(2)     | 103.54(4) |
| S(1)-Au(1)-Au(2)     | 79.16(5)  |
| P(2)-Au(2)-S(2)      | 175.72(6) |
| P(2)-Au(2)-Au(1)     | 98.17(4)  |
| S(2)-Au(2)-Au(1)     | 83.76(4)  |
| C(13)-P(1)-C(19)     | 103.9(3)  |
| C(13)-P(1)-C(7)      | 104.8(3)  |
| C(19)-P(1)-C(7)      | 106.1(3)  |
| C(13)-P(1)-Au(1)     | 116.2(2)  |
| C(19)-P(1)-Au(1)     | 115.0(2)  |
| C(7)-P(1)-Au(1)      | 109.9(2)  |
| C(26)-P(2)-C(32)     | 105.8(3)  |
| C(26)-P(2)-C(38)     | 105.7(3)  |
| C(32)-P(2)-C(38)     | 103.8(3)  |
| C(26)-P(2)-Au(2)     | 112.4(2)  |
| C(32)-P(2)-Au(2)     | 115.3(2)  |
| C(38)-P(2)-Au(2)     | 112.9(2)  |
| C(1)-S(1)-Au(1)      | 98.4(2)   |
| C(20)-S(2)-Au(2)     | 111.0(2)  |

Table S4. Crystal data and structure refinement for **2**.

|                                   |                                                                                              |                  |
|-----------------------------------|----------------------------------------------------------------------------------------------|------------------|
| Identification code               | <b>2</b>                                                                                     |                  |
| Empirical formula                 | C <sub>39</sub> H <sub>28</sub> Au <sub>2</sub> F <sub>8</sub> P <sub>2</sub> S <sub>2</sub> |                  |
| Formula weight                    | 1168.61                                                                                      |                  |
| Temperature                       | 130(2) K                                                                                     |                  |
| Wavelength                        | 0.71073 Å                                                                                    |                  |
| Crystal system                    | Monoclinic                                                                                   |                  |
| Space group                       | C 2/c                                                                                        |                  |
| Unit cell dimensions              | a = 19.7541(14) Å                                                                            | α = 90°.         |
|                                   | b = 18.1508(14) Å                                                                            | β = 113.410(8)°. |
|                                   | c = 23.2826(17) Å                                                                            | γ = 90°.         |
| Volume                            | 7660.9(11) Å <sup>3</sup>                                                                    |                  |
| Z                                 | 8                                                                                            |                  |
| Density (calculated)              | 2.026 Mg/m <sup>3</sup>                                                                      |                  |
| Absorption coefficient            | 7.912 mm <sup>-1</sup>                                                                       |                  |
| F(000)                            | 4432                                                                                         |                  |
| Crystal size                      | 0.470 x 0.210 x 0.200 mm <sup>3</sup>                                                        |                  |
| Theta range for data collection   | 3.550 to 29.534°.                                                                            |                  |
| Index ranges                      | -27 ≤ h ≤ 24, -23 ≤ k ≤ 24, -31 ≤ l ≤ 29                                                     |                  |
| Reflections collected             | 25955                                                                                        |                  |
| Independent reflections           | 9266 [R(int) = 0.0335]                                                                       |                  |
| Completeness to theta = 25.242°   | 99.7 %                                                                                       |                  |
| Refinement method                 | Full-matrix least-squares on F <sup>2</sup>                                                  |                  |
| Data / restraints / parameters    | 9266 / 0 / 478                                                                               |                  |
| Goodness-of-fit on F <sup>2</sup> | 1.055                                                                                        |                  |
| Final R indices [I > 2σ(I)]       | R1 = 0.0282, wR2 = 0.0534                                                                    |                  |
| R indices (all data)              | R1 = 0.0390, wR2 = 0.0578                                                                    |                  |
| Largest diff. peak and hole       | 0.943 and -1.299 e.Å <sup>-3</sup>                                                           |                  |

Table S5. Atomic coordinates ( $\times 10^4$ ) and equivalent isotropic displacement parameters ( $\text{\AA}^2 \times 10^3$ ) for **2**.  $U(\text{eq})$  is defined as one third of the trace of the orthogonalized  $U^{ij}$  tensor.

|       | x       | y       | z       | U(eq) |
|-------|---------|---------|---------|-------|
| C(1)  | 2665(2) | 387(2)  | 3730(2) | 20(1) |
| C(2)  | 3071(2) | 1031(2) | 3905(2) | 21(1) |
| C(3)  | 3774(2) | 1045(3) | 4375(2) | 28(1) |
| C(4)  | 4102(2) | 422(3)  | 4695(2) | 35(1) |
| C(5)  | 3707(3) | -223(3) | 4529(2) | 39(1) |
| C(6)  | 3008(2) | -241(2) | 4062(2) | 26(1) |
| C(7)  | 1313(2) | 1870(2) | 944(2)  | 18(1) |
| C(8)  | 1964(2) | 1644(2) | 906(2)  | 23(1) |
| C(9)  | 1973(2) | 1448(2) | 334(2)  | 27(1) |
| C(10) | 1330(3) | 1448(2) | -199(2) | 29(1) |
| C(11) | 677(2)  | 1657(2) | -164(2) | 27(1) |
| C(12) | 662(2)  | 1875(2) | 400(2)  | 22(1) |
| C(13) | 448(2)  | 2532(2) | 1571(2) | 17(1) |
| C(14) | -76(2)  | 2120(2) | 1686(2) | 20(1) |
| C(15) | -754(2) | 2425(3) | 1597(2) | 28(1) |
| C(16) | -919(3) | 3137(3) | 1390(2) | 36(1) |
| C(17) | -403(3) | 3552(3) | 1275(2) | 40(1) |
| C(18) | 280(3)  | 3254(2) | 1358(2) | 32(1) |
| C(19) | 2038(2) | 2822(2) | 1953(2) | 21(1) |
| C(20) | 2188(2) | 3217(2) | 2572(2) | 18(1) |
| C(21) | 2954(2) | 3578(2) | 2792(2) | 16(1) |
| C(22) | 1027(2) | 6362(2) | 2903(2) | 20(1) |
| C(23) | 797(2)  | 5817(2) | 3207(2) | 23(1) |
| C(24) | 441(2)  | 5981(2) | 3592(2) | 24(1) |
| C(25) | 284(2)  | 6694(2) | 3694(2) | 26(1) |
| C(26) | 495(2)  | 7238(2) | 3393(2) | 25(1) |
| C(27) | 865(2)  | 7082(2) | 3021(2) | 21(1) |
| C(28) | 4047(2) | 4610(2) | 3567(2) | 13(1) |
| C(29) | 4362(2) | 5066(2) | 4090(2) | 17(1) |
| C(30) | 5075(2) | 5323(2) | 4259(2) | 19(1) |
| C(31) | 5474(2) | 5138(2) | 3909(2) | 20(1) |
| C(32) | 5164(2) | 4685(2) | 3393(2) | 19(1) |
| C(33) | 4457(2) | 4417(2) | 3223(2) | 16(1) |
| C(34) | 3021(2) | 3995(2) | 4027(2) | 15(1) |
| C(35) | 2610(2) | 4377(2) | 4293(2) | 22(1) |
| C(36) | 2569(2) | 4127(3) | 4842(2) | 28(1) |
| C(37) | 2937(2) | 3500(2) | 5126(2) | 26(1) |

|       |         |         |         |       |
|-------|---------|---------|---------|-------|
| C(38) | 3346(2) | 3113(2) | 4868(2) | 28(1) |
| C(39) | 3388(2) | 3360(2) | 4320(2) | 23(1) |
| Au(1) | 1598(1) | 1200(1) | 2418(1) | 15(1) |
| Au(2) | 2299(1) | 5279(1) | 2872(1) | 15(1) |
| F(1)  | 2783(1) | 1676(1) | 3634(1) | 27(1) |
| F(2)  | 4137(1) | 1694(2) | 4515(1) | 36(1) |
| F(3)  | 4006(2) | -858(2) | 4820(1) | 63(1) |
| F(4)  | 2646(2) | -890(1) | 3934(1) | 41(1) |
| F(5)  | 904(1)  | 5100(1) | 3117(1) | 32(1) |
| F(6)  | 228(2)  | 5428(2) | 3866(1) | 38(1) |
| F(7)  | 334(2)  | 7951(1) | 3451(1) | 34(1) |
| F(8)  | 1060(1) | 7649(1) | 2739(1) | 31(1) |
| P(1)  | 1328(1) | 2116(1) | 1704(1) | 15(1) |
| P(2)  | 3088(1) | 4348(1) | 3325(1) | 12(1) |
| S(1)  | 1760(1) | 304(1)  | 3167(1) | 22(1) |
| S(2)  | 1467(1) | 6206(1) | 2392(1) | 26(1) |

Table S6. Bond lengths [Å] and angles [°] for 2.

|              |          |                |            |
|--------------|----------|----------------|------------|
| C(1)-C(2)    | 1.384(6) | C(21)-H(21B)   | 0.9900     |
| C(1)-C(6)    | 1.393(6) | C(22)-C(23)    | 1.393(6)   |
| C(1)-S(1)    | 1.754(4) | C(22)-C(27)    | 1.398(6)   |
| C(2)-F(1)    | 1.344(5) | C(22)-S(2)     | 1.754(4)   |
| C(2)-C(3)    | 1.385(6) | C(23)-F(5)     | 1.347(5)   |
| C(3)-F(2)    | 1.350(5) | C(23)-C(24)    | 1.374(6)   |
| C(3)-C(4)    | 1.368(7) | C(24)-F(6)     | 1.342(5)   |
| C(4)-C(5)    | 1.374(7) | C(24)-C(25)    | 1.373(6)   |
| C(4)-H(4)    | 0.9500   | C(25)-C(26)    | 1.367(6)   |
| C(5)-F(3)    | 1.349(5) | C(25)-H(25)    | 0.9500     |
| C(5)-C(6)    | 1.377(6) | C(26)-F(7)     | 1.352(5)   |
| C(6)-F(4)    | 1.349(5) | C(26)-C(27)    | 1.368(6)   |
| C(7)-C(8)    | 1.387(6) | C(27)-F(8)     | 1.355(5)   |
| C(7)-C(12)   | 1.401(5) | C(28)-C(33)    | 1.391(5)   |
| C(7)-P(1)    | 1.814(4) | C(28)-C(29)    | 1.396(5)   |
| C(8)-C(9)    | 1.385(6) | C(28)-P(2)     | 1.812(4)   |
| C(8)-H(8)    | 0.9500   | C(29)-C(30)    | 1.384(5)   |
| C(9)-C(10)   | 1.379(6) | C(29)-H(29)    | 0.9500     |
| C(9)-H(9)    | 0.9500   | C(30)-C(31)    | 1.381(6)   |
| C(10)-C(11)  | 1.378(6) | C(30)-H(30)    | 0.9500     |
| C(10)-H(10)  | 0.9500   | C(31)-C(32)    | 1.384(6)   |
| C(11)-C(12)  | 1.381(6) | C(31)-H(31)    | 0.9500     |
| C(11)-H(11)  | 0.9500   | C(32)-C(33)    | 1.380(5)   |
| C(12)-H(12)  | 0.9500   | C(32)-H(32)    | 0.9500     |
| C(13)-C(14)  | 1.387(6) | C(33)-H(33)    | 0.9500     |
| C(13)-C(18)  | 1.393(6) | C(34)-C(39)    | 1.386(5)   |
| C(13)-P(1)   | 1.804(4) | C(34)-C(35)    | 1.389(6)   |
| C(14)-C(15)  | 1.387(6) | C(34)-P(2)     | 1.808(4)   |
| C(14)-H(14)  | 0.9500   | C(35)-C(36)    | 1.387(6)   |
| C(15)-C(16)  | 1.374(7) | C(35)-H(35)    | 0.9500     |
| C(15)-H(15)  | 0.9500   | C(36)-C(37)    | 1.371(6)   |
| C(16)-C(17)  | 1.375(7) | C(36)-H(36)    | 0.9500     |
| C(16)-H(16)  | 0.9500   | C(37)-C(38)    | 1.377(6)   |
| C(17)-C(18)  | 1.394(7) | C(37)-H(37)    | 0.9500     |
| C(17)-H(17)  | 0.9500   | C(38)-C(39)    | 1.387(6)   |
| C(18)-H(18)  | 0.9500   | C(38)-H(38)    | 0.9500     |
| C(19)-C(20)  | 1.529(5) | C(39)-H(39)    | 0.9500     |
| C(19)-P(1)   | 1.817(4) | Au(1)-P(1)     | 2.2589(10) |
| C(19)-H(19A) | 0.9900   | Au(1)-S(1)     | 2.3131(10) |
| C(19)-H(19B) | 0.9900   | Au(1)-Au(2)#1  | 3.0287(3)  |
| C(20)-C(21)  | 1.538(5) | Au(2)-P(2)     | 2.2569(10) |
| C(20)-H(20A) | 0.9900   | Au(2)-S(2)     | 2.3077(10) |
| C(20)-H(20B) | 0.9900   |                |            |
| C(21)-P(2)   | 1.817(4) | C(2)-C(1)-C(6) | 115.5(4)   |
| C(21)-H(21A) | 0.9900   | C(2)-C(1)-S(1) | 126.3(3)   |

|                   |          |
|-------------------|----------|
| C(6)-C(1)-S(1)    | 118.1(3) |
| F(1)-C(2)-C(1)    | 120.6(3) |
| F(1)-C(2)-C(3)    | 117.3(4) |
| C(1)-C(2)-C(3)    | 122.0(4) |
| F(2)-C(3)-C(4)    | 119.9(4) |
| F(2)-C(3)-C(2)    | 118.5(4) |
| C(4)-C(3)-C(2)    | 121.6(4) |
| C(3)-C(4)-C(5)    | 117.3(4) |
| C(3)-C(4)-H(4)    | 121.4    |
| C(5)-C(4)-H(4)    | 121.4    |
| F(3)-C(5)-C(4)    | 120.1(4) |
| F(3)-C(5)-C(6)    | 118.5(5) |
| C(4)-C(5)-C(6)    | 121.4(4) |
| F(4)-C(6)-C(5)    | 118.2(4) |
| F(4)-C(6)-C(1)    | 119.6(4) |
| C(5)-C(6)-C(1)    | 122.2(4) |
| C(8)-C(7)-C(12)   | 118.9(4) |
| C(8)-C(7)-P(1)    | 118.7(3) |
| C(12)-C(7)-P(1)   | 122.3(3) |
| C(9)-C(8)-C(7)    | 120.3(4) |
| C(9)-C(8)-H(8)    | 119.8    |
| C(7)-C(8)-H(8)    | 119.8    |
| C(10)-C(9)-C(8)   | 120.4(4) |
| C(10)-C(9)-H(9)   | 119.8    |
| C(8)-C(9)-H(9)    | 119.8    |
| C(11)-C(10)-C(9)  | 119.7(4) |
| C(11)-C(10)-H(10) | 120.1    |
| C(9)-C(10)-H(10)  | 120.1    |
| C(10)-C(11)-C(12) | 120.6(4) |
| C(10)-C(11)-H(11) | 119.7    |
| C(12)-C(11)-H(11) | 119.7    |
| C(11)-C(12)-C(7)  | 120.0(4) |
| C(11)-C(12)-H(12) | 120.0    |
| C(7)-C(12)-H(12)  | 120.0    |
| C(14)-C(13)-C(18) | 119.0(4) |
| C(14)-C(13)-P(1)  | 118.9(3) |
| C(18)-C(13)-P(1)  | 122.1(3) |
| C(13)-C(14)-C(15) | 120.5(4) |
| C(13)-C(14)-H(14) | 119.8    |
| C(15)-C(14)-H(14) | 119.8    |
| C(16)-C(15)-C(14) | 120.5(4) |
| C(16)-C(15)-H(15) | 119.8    |
| C(14)-C(15)-H(15) | 119.8    |
| C(15)-C(16)-C(17) | 119.6(4) |
| C(15)-C(16)-H(16) | 120.2    |
| C(17)-C(16)-H(16) | 120.2    |
| C(16)-C(17)-C(18) | 120.7(4) |
| C(16)-C(17)-H(17) | 119.7    |

|                     |          |
|---------------------|----------|
| C(18)-C(17)-H(17)   | 119.7    |
| C(17)-C(18)-C(13)   | 119.8(4) |
| C(17)-C(18)-H(18)   | 120.1    |
| C(13)-C(18)-H(18)   | 120.1    |
| C(20)-C(19)-P(1)    | 117.8(3) |
| C(20)-C(19)-H(19A)  | 107.8    |
| P(1)-C(19)-H(19A)   | 107.8    |
| C(20)-C(19)-H(19B)  | 107.8    |
| P(1)-C(19)-H(19B)   | 107.8    |
| H(19A)-C(19)-H(19B) | 107.2    |
| C(19)-C(20)-C(21)   | 108.1(3) |
| C(19)-C(20)-H(20A)  | 110.1    |
| C(21)-C(20)-H(20A)  | 110.1    |
| C(19)-C(20)-H(20B)  | 110.1    |
| C(21)-C(20)-H(20B)  | 110.1    |
| H(20A)-C(20)-H(20B) | 108.4    |
| C(20)-C(21)-P(2)    | 114.4(3) |
| C(20)-C(21)-H(21A)  | 108.7    |
| P(2)-C(21)-H(21A)   | 108.7    |
| C(20)-C(21)-H(21B)  | 108.7    |
| P(2)-C(21)-H(21B)   | 108.7    |
| H(21A)-C(21)-H(21B) | 107.6    |
| C(23)-C(22)-C(27)   | 114.8(4) |
| C(23)-C(22)-S(2)    | 125.4(3) |
| C(27)-C(22)-S(2)    | 119.8(3) |
| F(5)-C(23)-C(24)    | 117.6(4) |
| F(5)-C(23)-C(22)    | 120.3(4) |
| C(24)-C(23)-C(22)   | 122.1(4) |
| F(6)-C(24)-C(25)    | 119.2(4) |
| F(6)-C(24)-C(23)    | 119.0(4) |
| C(25)-C(24)-C(23)   | 121.7(4) |
| C(26)-C(25)-C(24)   | 117.2(4) |
| C(26)-C(25)-H(25)   | 121.4    |
| C(24)-C(25)-H(25)   | 121.4    |
| F(7)-C(26)-C(27)    | 117.8(4) |
| F(7)-C(26)-C(25)    | 120.5(4) |
| C(27)-C(26)-C(25)   | 121.6(4) |
| F(8)-C(27)-C(26)    | 118.5(4) |
| F(8)-C(27)-C(22)    | 119.0(4) |
| C(26)-C(27)-C(22)   | 122.5(4) |
| C(33)-C(28)-C(29)   | 119.4(3) |
| C(33)-C(28)-P(2)    | 122.0(3) |
| C(29)-C(28)-P(2)    | 118.4(3) |
| C(30)-C(29)-C(28)   | 119.9(4) |
| C(30)-C(29)-H(29)   | 120.0    |
| C(28)-C(29)-H(29)   | 120.0    |
| C(31)-C(30)-C(29)   | 120.3(4) |
| C(31)-C(30)-H(30)   | 119.8    |

|                   |          |
|-------------------|----------|
| C(29)-C(30)-H(30) | 119.8    |
| C(30)-C(31)-C(32) | 119.8(4) |
| C(30)-C(31)-H(31) | 120.1    |
| C(32)-C(31)-H(31) | 120.1    |
| C(33)-C(32)-C(31) | 120.4(4) |
| C(33)-C(32)-H(32) | 119.8    |
| C(31)-C(32)-H(32) | 119.8    |
| C(32)-C(33)-C(28) | 120.1(3) |
| C(32)-C(33)-H(33) | 120.0    |
| C(28)-C(33)-H(33) | 120.0    |
| C(39)-C(34)-C(35) | 118.7(4) |
| C(39)-C(34)-P(2)  | 121.8(3) |
| C(35)-C(34)-P(2)  | 119.5(3) |
| C(36)-C(35)-C(34) | 120.4(4) |
| C(36)-C(35)-H(35) | 119.8    |
| C(34)-C(35)-H(35) | 119.8    |
| C(37)-C(36)-C(35) | 120.2(4) |
| C(37)-C(36)-H(36) | 119.9    |
| C(35)-C(36)-H(36) | 119.9    |
| C(36)-C(37)-C(38) | 120.3(4) |
| C(36)-C(37)-H(37) | 119.9    |
| C(38)-C(37)-H(37) | 119.9    |
| C(37)-C(38)-C(39) | 119.7(4) |
| C(37)-C(38)-H(38) | 120.1    |

|                    |            |
|--------------------|------------|
| C(39)-C(38)-H(38)  | 120.1      |
| C(34)-C(39)-C(38)  | 120.7(4)   |
| C(34)-C(39)-H(39)  | 119.6      |
| C(38)-C(39)-H(39)  | 119.6      |
| P(1)-Au(1)-S(1)    | 173.63(4)  |
| P(1)-Au(1)-Au(2)#1 | 102.91(3)  |
| S(1)-Au(1)-Au(2)#1 | 83.26(3)   |
| P(2)-Au(2)-S(2)    | 178.40(4)  |
| P(2)-Au(2)-Au(1)#2 | 95.33(3)   |
| S(2)-Au(2)-Au(1)#2 | 85.76(3)   |
| C(13)-P(1)-C(7)    | 107.07(18) |
| C(13)-P(1)-C(19)   | 109.19(19) |
| C(7)-P(1)-C(19)    | 101.31(18) |
| C(13)-P(1)-Au(1)   | 111.37(13) |
| C(7)-P(1)-Au(1)    | 116.32(13) |
| C(19)-P(1)-Au(1)   | 110.97(14) |
| C(34)-P(2)-C(28)   | 104.79(16) |
| C(34)-P(2)-C(21)   | 107.56(18) |
| C(28)-P(2)-C(21)   | 105.41(17) |
| C(34)-P(2)-Au(2)   | 113.77(13) |
| C(28)-P(2)-Au(2)   | 113.04(12) |
| C(21)-P(2)-Au(2)   | 111.66(13) |
| C(1)-S(1)-Au(1)    | 107.32(14) |
| C(22)-S(2)-Au(2)   | 103.80(13) |



Table S7. Crystal data and structure refinement for **4**.

|                                   |                                                                                              |                  |
|-----------------------------------|----------------------------------------------------------------------------------------------|------------------|
| Identification code               | <b>4</b>                                                                                     |                  |
| Empirical formula                 | C <sub>41</sub> H <sub>34</sub> Au <sub>2</sub> F <sub>6</sub> P <sub>2</sub> S <sub>2</sub> |                  |
| Formula weight                    | 1160.67                                                                                      |                  |
| Temperature                       | 130(2) K                                                                                     |                  |
| Wavelength                        | 0.71073 Å                                                                                    |                  |
| Crystal system                    | Triclinic                                                                                    |                  |
| Space group                       | P -1                                                                                         |                  |
| Unit cell dimensions              | a = 8.8464(3) Å                                                                              | α = 98.173(4)°.  |
|                                   | b = 10.8946(6) Å                                                                             | β = 99.266(3)°.  |
|                                   | c = 21.8504(8) Å                                                                             | γ = 104.869(4)°. |
| Volume                            | 1971.31(15) Å <sup>3</sup>                                                                   |                  |
| Z                                 | 2                                                                                            |                  |
| Density (calculated)              | 1.955 Mg/m <sup>3</sup>                                                                      |                  |
| Absorption coefficient            | 7.679 mm <sup>-1</sup>                                                                       |                  |
| F(000)                            | 1108                                                                                         |                  |
| Crystal size                      | 0.400 x 0.130 x 0.080 mm <sup>3</sup>                                                        |                  |
| Theta range for data collection   | 3.545 to 29.573°.                                                                            |                  |
| Index ranges                      | -11 ≤ h ≤ 12, -11 ≤ k ≤ 13, -30 ≤ l ≤ 28                                                     |                  |
| Reflections collected             | 17616                                                                                        |                  |
| Independent reflections           | 9220 [R(int) = 0.0278]                                                                       |                  |
| Completeness to theta = 25.242°   | 99.7 %                                                                                       |                  |
| Refinement method                 | Full-matrix least-squares on F <sup>2</sup>                                                  |                  |
| Data / restraints / parameters    | 9220 / 0 / 478                                                                               |                  |
| Goodness-of-fit on F <sup>2</sup> | 1.030                                                                                        |                  |
| Final R indices [I > 2σ(I)]       | R1 = 0.0291, wR2 = 0.0525                                                                    |                  |
| R indices (all data)              | R1 = 0.0390, wR2 = 0.0571                                                                    |                  |
| Largest diff. peak and hole       | 1.335 and -1.466 e.Å <sup>-3</sup>                                                           |                  |

Table S8. Atomic coordinates ( $\times 10^4$ ) and equivalent isotropic displacement parameters ( $\text{\AA}^2 \times 10^3$ )for **4**.  $U(\text{eq})$  is defined as one third of the trace of the orthogonalized  $U^{ij}$  tensor.

|       | x        | y        | z       | U(eq) |
|-------|----------|----------|---------|-------|
| C(1)  | 420(4)   | -1656(4) | 3979(2) | 20(1) |
| C(2)  | 990(4)   | -1589(4) | 4625(2) | 24(1) |
| C(3)  | 751(6)   | -2765(5) | 4912(2) | 34(1) |
| C(4)  | 1799(5)  | -394(5)  | 5018(2) | 32(1) |
| C(5)  | 2047(5)  | 729(5)   | 4787(2) | 35(1) |
| C(6)  | 1464(5)  | 677(5)   | 4151(2) | 32(1) |
| C(7)  | 653(5)   | -498(4)  | 3761(2) | 27(1) |
| C(8)  | 1646(4)  | -1056(4) | 1500(2) | 18(1) |
| C(9)  | 2635(5)  | -284(4)  | 2057(2) | 27(1) |
| C(10) | 3724(5)  | 865(5)   | 2026(3) | 40(1) |
| C(11) | 3858(5)  | 1224(5)  | 1457(3) | 39(1) |
| C(12) | 2902(5)  | 462(5)   | 909(2)  | 37(1) |
| C(13) | 1789(5)  | -678(4)  | 929(2)  | 27(1) |
| C(14) | -1557(4) | -2658(4) | 958(2)  | 19(1) |
| C(15) | -2123(4) | -3532(4) | 384(2)  | 24(1) |
| C(16) | -3544(5) | -3545(5) | -4(2)   | 34(1) |
| C(17) | -4383(5) | -2716(5) | 175(2)  | 36(1) |
| C(18) | -3832(5) | -1837(5) | 743(2)  | 33(1) |
| C(19) | -2412(5) | -1814(4) | 1129(2) | 26(1) |
| C(20) | 1135(4)  | -3773(4) | 1150(2) | 18(1) |
| C(21) | 2731(4)  | -3758(4) | 1553(2) | 19(1) |
| C(22) | -1576(4) | -6745(4) | 1819(2) | 18(1) |
| C(23) | -939(4)  | -7659(4) | 1517(2) | 20(1) |
| C(24) | -1222(5) | -8013(4) | 813(2)  | 27(1) |
| C(25) | -40(5)   | -8300(4) | 1868(2) | 26(1) |
| C(26) | 213(5)   | -8065(4) | 2523(2) | 29(1) |
| C(27) | -468(5)  | -7203(4) | 2819(2) | 27(1) |
| C(28) | -1340(4) | -6551(4) | 2477(2) | 21(1) |
| C(29) | -5683(4) | -4928(4) | 3283(2) | 22(1) |
| C(30) | -4439(5) | -5371(5) | 3544(2) | 31(1) |
| C(31) | -4527(5) | -5955(5) | 4067(2) | 37(1) |
| C(32) | -5855(5) | -6096(5) | 4324(2) | 34(1) |
| C(33) | -7088(5) | -5663(5) | 4069(2) | 32(1) |
| C(34) | -7023(5) | -5085(4) | 3545(2) | 28(1) |
| C(35) | -4895(4) | -2386(4) | 2955(2) | 22(1) |
| C(36) | -5640(5) | -1903(5) | 3410(2) | 30(1) |
| C(37) | -5272(6) | -599(5)  | 3636(2) | 39(1) |

|       |          |          |         |       |
|-------|----------|----------|---------|-------|
| C(38) | -4158(6) | 245(5)   | 3407(2) | 41(1) |
| C(39) | -3405(5) | -213(5)  | 2963(3) | 47(2) |
| C(40) | -3757(5) | -1521(4) | 2740(2) | 31(1) |
| C(41) | -7396(4) | -4408(4) | 2121(2) | 20(1) |
| Au(1) | -239(1)  | -2846(1) | 2478(1) | 17(1) |
| Au(2) | -3803(1) | -4811(1) | 2051(1) | 18(1) |
| F(1)  | 1208(4)  | -2497(3) | 5543(1) | 52(1) |
| F(2)  | 1562(4)  | -3561(3) | 4706(1) | 52(1) |
| F(3)  | -791(3)  | -3484(3) | 4794(1) | 46(1) |
| F(4)  | -2777(3) | -8497(3) | 543(1)  | 36(1) |
| F(5)  | -532(3)  | -8912(3) | 619(1)  | 42(1) |
| F(6)  | -656(3)  | -7004(3) | 536(1)  | 39(1) |
| P(1)  | 240(1)   | -2597(1) | 1512(1) | 15(1) |
| P(2)  | -5428(1) | -4103(1) | 2624(1) | 18(1) |
| S(1)  | -565(1)  | -3161(1) | 3472(1) | 26(1) |
| S(2)  | -2580(1) | -5848(1) | 1374(1) | 20(1) |

Table S9. Bond lengths [Å] and angles [°] for 4.

|             |          |
|-------------|----------|
| C(1)-C(7)   | 1.389(6) |
| C(1)-C(2)   | 1.406(5) |
| C(1)-S(1)   | 1.764(4) |
| C(2)-C(4)   | 1.396(6) |
| C(2)-C(3)   | 1.486(7) |
| C(3)-F(2)   | 1.335(6) |
| C(3)-F(1)   | 1.340(5) |
| C(3)-F(3)   | 1.350(5) |
| C(4)-C(5)   | 1.369(7) |
| C(4)-H(4)   | 0.9500   |
| C(5)-C(6)   | 1.391(6) |
| C(5)-H(5)   | 0.9500   |
| C(6)-C(7)   | 1.379(6) |
| C(6)-H(6)   | 0.9500   |
| C(7)-H(7)   | 0.9500   |
| C(8)-C(13)  | 1.382(6) |
| C(8)-C(9)   | 1.393(5) |
| C(8)-P(1)   | 1.822(4) |
| C(9)-C(10)  | 1.387(6) |
| C(9)-H(9)   | 0.9500   |
| C(10)-C(11) | 1.371(7) |
| C(10)-H(10) | 0.9500   |
| C(11)-C(12) | 1.367(6) |
| C(11)-H(11) | 0.9500   |
| C(12)-C(13) | 1.384(6) |
| C(12)-H(12) | 0.9500   |
| C(13)-H(13) | 0.9500   |
| C(14)-C(19) | 1.381(6) |
| C(14)-C(15) | 1.394(5) |
| C(14)-P(1)  | 1.816(4) |
| C(15)-C(16) | 1.395(6) |
| C(15)-H(15) | 0.9500   |
| C(16)-C(17) | 1.364(7) |
| C(16)-H(16) | 0.9500   |
| C(17)-C(18) | 1.386(7) |
| C(17)-H(17) | 0.9500   |
| C(18)-C(19) | 1.388(6) |
| C(18)-H(18) | 0.9500   |
| C(19)-H(19) | 0.9500   |

|               |          |
|---------------|----------|
| C(20)-C(21)   | 1.533(5) |
| C(20)-P(1)    | 1.824(4) |
| C(20)-H(20A)  | 0.9900   |
| C(20)-H(20B)  | 0.9900   |
| C(21)-C(41)#1 | 1.519(5) |
| C(21)-H(21A)  | 0.9900   |
| C(21)-H(21B)  | 0.9900   |
| C(22)-C(28)   | 1.396(5) |
| C(22)-C(23)   | 1.402(6) |
| C(22)-S(2)    | 1.767(4) |
| C(23)-C(25)   | 1.396(6) |
| C(23)-C(24)   | 1.495(5) |
| C(24)-F(5)    | 1.336(5) |
| C(24)-F(4)    | 1.341(5) |
| C(24)-F(6)    | 1.353(5) |
| C(25)-C(26)   | 1.388(6) |
| C(25)-H(25)   | 0.9500   |
| C(26)-C(27)   | 1.380(6) |
| C(26)-H(26)   | 0.9500   |
| C(27)-C(28)   | 1.380(6) |
| C(27)-H(27)   | 0.9500   |
| C(28)-H(28)   | 0.9500   |
| C(29)-C(34)   | 1.381(6) |
| C(29)-C(30)   | 1.385(6) |
| C(29)-P(2)    | 1.816(4) |
| C(30)-C(31)   | 1.387(6) |
| C(30)-H(30)   | 0.9500   |
| C(31)-C(32)   | 1.365(6) |
| C(31)-H(31)   | 0.9500   |
| C(32)-C(33)   | 1.366(7) |
| C(32)-H(32)   | 0.9500   |
| C(33)-C(34)   | 1.384(6) |
| C(33)-H(33)   | 0.9500   |
| C(34)-H(34)   | 0.9500   |
| C(35)-C(40)   | 1.383(6) |
| C(35)-C(36)   | 1.393(6) |
| C(35)-P(2)    | 1.816(4) |
| C(36)-C(37)   | 1.371(6) |
| C(36)-H(36)   | 0.9500   |

|                 |            |
|-----------------|------------|
| C(37)-C(38)     | 1.376(7)   |
| C(37)-H(37)     | 0.9500     |
| C(38)-C(39)     | 1.370(7)   |
| C(38)-H(38)     | 0.9500     |
| C(39)-C(40)     | 1.375(7)   |
| C(39)-H(39)     | 0.9500     |
| C(40)-H(40)     | 0.9500     |
| C(41)-C(21)#2   | 1.519(5)   |
| C(41)-P(2)      | 1.826(4)   |
| C(41)-H(41A)    | 0.9900     |
| C(41)-H(41B)    | 0.9900     |
| Au(1)-P(1)      | 2.2583(10) |
| Au(1)-S(1)      | 2.2985(10) |
| Au(1)-Au(2)     | 3.2276(3)  |
| Au(2)-P(2)      | 2.2595(10) |
| Au(2)-S(2)      | 2.3026(10) |
|                 |            |
| C(7)-C(1)-C(2)  | 117.4(4)   |
| C(7)-C(1)-S(1)  | 121.9(3)   |
| C(2)-C(1)-S(1)  | 120.7(3)   |
| C(4)-C(2)-C(1)  | 120.1(4)   |
| C(4)-C(2)-C(3)  | 118.1(4)   |
| C(1)-C(2)-C(3)  | 121.8(4)   |
| F(2)-C(3)-F(1)  | 105.8(4)   |
| F(2)-C(3)-F(3)  | 105.9(4)   |
| F(1)-C(3)-F(3)  | 104.9(4)   |
| F(2)-C(3)-C(2)  | 113.0(4)   |
| F(1)-C(3)-C(2)  | 113.2(4)   |
| F(3)-C(3)-C(2)  | 113.2(4)   |
| C(5)-C(4)-C(2)  | 121.3(4)   |
| C(5)-C(4)-H(4)  | 119.4      |
| C(2)-C(4)-H(4)  | 119.4      |
| C(4)-C(5)-C(6)  | 119.2(4)   |
| C(4)-C(5)-H(5)  | 120.4      |
| C(6)-C(5)-H(5)  | 120.4      |
| C(7)-C(6)-C(5)  | 119.9(5)   |
| C(7)-C(6)-H(6)  | 120.1      |
| C(5)-C(6)-H(6)  | 120.1      |
| C(6)-C(7)-C(1)  | 122.1(4)   |
| C(6)-C(7)-H(7)  | 118.9      |
| C(1)-C(7)-H(7)  | 118.9      |
| C(13)-C(8)-C(9) | 119.6(4)   |

|                     |          |
|---------------------|----------|
| C(13)-C(8)-P(1)     | 119.6(3) |
| C(9)-C(8)-P(1)      | 120.7(3) |
| C(10)-C(9)-C(8)     | 119.1(4) |
| C(10)-C(9)-H(9)     | 120.5    |
| C(8)-C(9)-H(9)      | 120.5    |
| C(11)-C(10)-C(9)    | 120.7(4) |
| C(11)-C(10)-H(10)   | 119.7    |
| C(9)-C(10)-H(10)    | 119.7    |
| C(12)-C(11)-C(10)   | 120.4(4) |
| C(12)-C(11)-H(11)   | 119.8    |
| C(10)-C(11)-H(11)   | 119.8    |
| C(11)-C(12)-C(13)   | 119.8(5) |
| C(11)-C(12)-H(12)   | 120.1    |
| C(13)-C(12)-H(12)   | 120.1    |
| C(8)-C(13)-C(12)    | 120.4(4) |
| C(8)-C(13)-H(13)    | 119.8    |
| C(12)-C(13)-H(13)   | 119.8    |
| C(19)-C(14)-C(15)   | 119.2(4) |
| C(19)-C(14)-P(1)    | 117.6(3) |
| C(15)-C(14)-P(1)    | 123.2(3) |
| C(14)-C(15)-C(16)   | 119.6(4) |
| C(14)-C(15)-H(15)   | 120.2    |
| C(16)-C(15)-H(15)   | 120.2    |
| C(17)-C(16)-C(15)   | 120.4(4) |
| C(17)-C(16)-H(16)   | 119.8    |
| C(15)-C(16)-H(16)   | 119.8    |
| C(16)-C(17)-C(18)   | 120.7(4) |
| C(16)-C(17)-H(17)   | 119.7    |
| C(18)-C(17)-H(17)   | 119.7    |
| C(17)-C(18)-C(19)   | 119.0(5) |
| C(17)-C(18)-H(18)   | 120.5    |
| C(19)-C(18)-H(18)   | 120.5    |
| C(14)-C(19)-C(18)   | 121.1(4) |
| C(14)-C(19)-H(19)   | 119.5    |
| C(18)-C(19)-H(19)   | 119.5    |
| C(21)-C(20)-P(1)    | 113.0(3) |
| C(21)-C(20)-H(20A)  | 109.0    |
| P(1)-C(20)-H(20A)   | 109.0    |
| C(21)-C(20)-H(20B)  | 109.0    |
| P(1)-C(20)-H(20B)   | 109.0    |
| H(20A)-C(20)-H(20B) | 107.8    |
| C(41)#1-C(21)-C(20) | 115.4(3) |

|                      |          |
|----------------------|----------|
| C(41)#1-C(21)-H(21A) | 108.4    |
| C(20)-C(21)-H(21A)   | 108.4    |
| C(41)#1-C(21)-H(21B) | 108.4    |
| C(20)-C(21)-H(21B)   | 108.4    |
| H(21A)-C(21)-H(21B)  | 107.5    |
| C(28)-C(22)-C(23)    | 117.5(4) |
| C(28)-C(22)-S(2)     | 122.1(3) |
| C(23)-C(22)-S(2)     | 120.5(3) |
| C(25)-C(23)-C(22)    | 120.8(4) |
| C(25)-C(23)-C(24)    | 117.4(4) |
| C(22)-C(23)-C(24)    | 121.9(4) |
| F(5)-C(24)-F(4)      | 105.7(3) |
| F(5)-C(24)-F(6)      | 105.6(4) |
| F(4)-C(24)-F(6)      | 105.8(3) |
| F(5)-C(24)-C(23)     | 112.7(4) |
| F(4)-C(24)-C(23)     | 112.7(4) |
| F(6)-C(24)-C(23)     | 113.6(3) |
| C(26)-C(25)-C(23)    | 120.6(4) |
| C(26)-C(25)-H(25)    | 119.7    |
| C(23)-C(25)-H(25)    | 119.7    |
| C(27)-C(26)-C(25)    | 118.6(4) |
| C(27)-C(26)-H(26)    | 120.7    |
| C(25)-C(26)-H(26)    | 120.7    |
| C(28)-C(27)-C(26)    | 121.2(4) |
| C(28)-C(27)-H(27)    | 119.4    |
| C(26)-C(27)-H(27)    | 119.4    |
| C(27)-C(28)-C(22)    | 121.3(4) |
| C(27)-C(28)-H(28)    | 119.4    |
| C(22)-C(28)-H(28)    | 119.4    |
| C(34)-C(29)-C(30)    | 119.2(4) |
| C(34)-C(29)-P(2)     | 123.0(3) |
| C(30)-C(29)-P(2)     | 117.7(3) |
| C(29)-C(30)-C(31)    | 120.6(4) |
| C(29)-C(30)-H(30)    | 119.7    |
| C(31)-C(30)-H(30)    | 119.7    |
| C(32)-C(31)-C(30)    | 119.6(4) |
| C(32)-C(31)-H(31)    | 120.2    |
| C(30)-C(31)-H(31)    | 120.2    |
| C(31)-C(32)-C(33)    | 120.2(4) |
| C(31)-C(32)-H(32)    | 119.9    |
| C(33)-C(32)-H(32)    | 119.9    |
| C(32)-C(33)-C(34)    | 120.9(4) |

|                      |            |
|----------------------|------------|
| C(32)-C(33)-H(33)    | 119.5      |
| C(34)-C(33)-H(33)    | 119.5      |
| C(29)-C(34)-C(33)    | 119.5(4)   |
| C(29)-C(34)-H(34)    | 120.3      |
| C(33)-C(34)-H(34)    | 120.3      |
| C(40)-C(35)-C(36)    | 118.6(4)   |
| C(40)-C(35)-P(2)     | 119.8(3)   |
| C(36)-C(35)-P(2)     | 121.6(3)   |
| C(37)-C(36)-C(35)    | 120.9(5)   |
| C(37)-C(36)-H(36)    | 119.6      |
| C(35)-C(36)-H(36)    | 119.6      |
| C(36)-C(37)-C(38)    | 119.5(5)   |
| C(36)-C(37)-H(37)    | 120.2      |
| C(38)-C(37)-H(37)    | 120.2      |
| C(39)-C(38)-C(37)    | 120.3(5)   |
| C(39)-C(38)-H(38)    | 119.8      |
| C(37)-C(38)-H(38)    | 119.8      |
| C(38)-C(39)-C(40)    | 120.3(5)   |
| C(38)-C(39)-H(39)    | 119.8      |
| C(40)-C(39)-H(39)    | 119.8      |
| C(39)-C(40)-C(35)    | 120.3(5)   |
| C(39)-C(40)-H(40)    | 119.9      |
| C(35)-C(40)-H(40)    | 119.9      |
| C(21)#2-C(41)-P(2)   | 110.8(2)   |
| C(21)#2-C(41)-H(41A) | 109.5      |
| P(2)-C(41)-H(41A)    | 109.5      |
| C(21)#2-C(41)-H(41B) | 109.5      |
| P(2)-C(41)-H(41B)    | 109.5      |
| H(41A)-C(41)-H(41B)  | 108.1      |
| P(1)-Au(1)-S(1)      | 175.75(4)  |
| P(1)-Au(1)-Au(2)     | 98.75(2)   |
| S(1)-Au(1)-Au(2)     | 83.37(2)   |
| P(2)-Au(2)-S(2)      | 169.04(3)  |
| P(2)-Au(2)-Au(1)     | 109.65(3)  |
| S(2)-Au(2)-Au(1)     | 81.31(2)   |
| C(14)-P(1)-C(8)      | 104.50(18) |
| C(14)-P(1)-C(20)     | 107.61(18) |
| C(8)-P(1)-C(20)      | 102.71(18) |
| C(14)-P(1)-Au(1)     | 112.20(13) |
| C(8)-P(1)-Au(1)      | 114.39(13) |
| C(20)-P(1)-Au(1)     | 114.50(13) |
| C(29)-P(2)-C(35)     | 105.91(19) |

|                  |            |
|------------------|------------|
| C(29)-P(2)-C(41) | 107.97(17) |
| C(35)-P(2)-C(41) | 103.06(19) |
| C(29)-P(2)-Au(2) | 111.85(15) |
| C(35)-P(2)-Au(2) | 118.00(14) |

|                  |            |
|------------------|------------|
| C(41)-P(2)-Au(2) | 109.34(14) |
| C(1)-S(1)-Au(1)  | 105.49(14) |
| C(22)-S(2)-Au(2) | 106.47(14) |

Table S10. Crystal data and structure refinement for **5**.

|                                   |                                                                                                              |                 |
|-----------------------------------|--------------------------------------------------------------------------------------------------------------|-----------------|
| Identification code               | <b>5</b>                                                                                                     |                 |
| Empirical formula                 | C <sub>43</sub> H <sub>36</sub> Au <sub>2</sub> Cl <sub>6</sub> F <sub>6</sub> P <sub>2</sub> S <sub>2</sub> |                 |
| Formula weight                    | 1399.41                                                                                                      |                 |
| Temperature                       | 130(2) K                                                                                                     |                 |
| Wavelength                        | 0.71073 Å                                                                                                    |                 |
| Crystal system                    | Monoclinic                                                                                                   |                 |
| Space group                       | P 21/c                                                                                                       |                 |
| Unit cell dimensions              | a = 16.9549(6) Å                                                                                             | α = 90°.        |
|                                   | b = 19.0738(6) Å                                                                                             | β = 97.626(3)°. |
|                                   | c = 14.7274(5) Å                                                                                             | γ = 90°.        |
| Volume                            | 4720.6(3) Å <sup>3</sup>                                                                                     |                 |
| Z                                 | 4                                                                                                            |                 |
| Density (calculated)              | 1.969 Mg/m <sup>3</sup>                                                                                      |                 |
| Absorption coefficient            | 6.760 mm <sup>-1</sup>                                                                                       |                 |
| F(000)                            | 2680                                                                                                         |                 |
| Crystal size                      | 0.370 x 0.270 x 0.120 mm <sup>3</sup>                                                                        |                 |
| Theta range for data collection   | 3.426 to 29.421°.                                                                                            |                 |
| Index ranges                      | -23 ≤ h ≤ 23, -25 ≤ k ≤ 18, -11 ≤ l ≤ 20                                                                     |                 |
| Reflections collected             | 23644                                                                                                        |                 |
| Independent reflections           | 11145 [R(int) = 0.0338]                                                                                      |                 |
| Completeness to theta = 25.242°   | 99.7 %                                                                                                       |                 |
| Refinement method                 | Full-matrix least-squares on F <sup>2</sup>                                                                  |                 |
| Data / restraints / parameters    | 11145 / 0 / 550                                                                                              |                 |
| Goodness-of-fit on F <sup>2</sup> | 1.051                                                                                                        |                 |
| Final R indices [I > 2σ(I)]       | R1 = 0.0378, wR2 = 0.0827                                                                                    |                 |
| R indices (all data)              | R1 = 0.0545, wR2 = 0.0918                                                                                    |                 |
| Largest diff. peak and hole       | 1.581 and -1.931 e.Å <sup>-3</sup>                                                                           |                 |



Table S11. Atomic coordinates (  $\times 10^4$ ) and equivalent isotropic displacement parameters ( $\text{\AA}^2 \times 10^3$ )for **5**.  $U(\text{eq})$  is defined as one third of the trace of the orthogonalized  $U^{ij}$  tensor.

|       | x        | y       | z        | U(eq) |
|-------|----------|---------|----------|-------|
| Au(1) | 8670(1)  | 3546(1) | 257(1)   | 18(1) |
| Au(2) | 9392(1)  | 2955(1) | 4830(1)  | 16(1) |
| S(1)  | 8573(1)  | 3736(1) | -1298(1) | 21(1) |
| S(2)  | 8534(1)  | 3618(1) | 5561(1)  | 22(1) |
| P(2)  | 10461(1) | 2500(1) | 4256(1)  | 16(1) |
| P(1)  | 8589(1)  | 3496(1) | 1774(1)  | 17(1) |
| F(1)  | 4707(3)  | 4567(3) | -2239(4) | 67(1) |
| F(4)  | 4799(3)  | 2881(3) | 3668(4)  | 70(2) |
| F(5)  | 4628(3)  | 3325(3) | 4944(4)  | 77(2) |
| F(2)  | 4725(3)  | 3565(2) | -2862(4) | 67(2) |
| F(3)  | 5000(3)  | 4463(3) | -3598(4) | 70(2) |
| F(6)  | 4707(3)  | 3990(3) | 3808(5)  | 94(2) |
| C(20) | 9027(3)  | 2748(3) | 2410(4)  | 17(1) |
| C(37) | 11049(4) | 3855(3) | 4117(4)  | 21(1) |
| C(30) | 10912(3) | 1798(3) | 4971(4)  | 18(1) |
| C(36) | 11242(3) | 3145(3) | 4201(4)  | 18(1) |
| C(23) | 7530(3)  | 3522(3) | 5065(4)  | 18(1) |
| C(31) | 10791(4) | 1098(3) | 4739(4)  | 25(1) |
| C(21) | 9930(3)  | 2690(3) | 2387(4)  | 18(1) |
| C(22) | 10315(3) | 2150(3) | 3088(4)  | 18(1) |
| C(2)  | 6953(4)  | 3843(3) | -1117(4) | 26(1) |
| C(24) | 7108(4)  | 2904(3) | 5131(4)  | 28(1) |
| C(9)  | 7042(4)  | 3983(3) | 1508(4)  | 25(1) |
| C(8)  | 7544(3)  | 3467(3) | 1927(4)  | 19(1) |
| C(41) | 12019(4) | 2933(3) | 4158(4)  | 26(1) |
| C(14) | 9006(3)  | 4254(3) | 2415(4)  | 19(1) |
| C(15) | 8766(4)  | 4410(3) | 3262(4)  | 23(1) |
| C(1)  | 7548(3)  | 3884(3) | -1680(4) | 20(1) |
| C(35) | 11337(4) | 1960(3) | 5826(4)  | 24(1) |
| C(29) | 7122(4)  | 4103(3) | 4689(4)  | 24(1) |
| C(39) | 12403(4) | 4128(3) | 3955(4)  | 28(1) |
| C(17) | 9707(4)  | 5353(3) | 3452(4)  | 29(1) |
| C(19) | 9609(4)  | 4642(3) | 2096(4)  | 22(1) |
| C(32) | 11092(4) | 573(3)  | 5342(5)  | 33(2) |
| C(7)  | 7338(4)  | 4035(3) | -2596(4) | 26(1) |
| C(16) | 9125(4)  | 4969(3) | 3772(4)  | 28(1) |
| C(13) | 7226(4)  | 2924(3) | 2380(4)  | 27(1) |

|       |          |         |          |        |
|-------|----------|---------|----------|--------|
| C(34) | 11637(4) | 1435(3) | 6419(4)  | 30(1)  |
| C(38) | 11625(4) | 4343(3) | 3983(4)  | 28(1)  |
| C(25) | 6297(4)  | 2878(4) | 4855(5)  | 35(2)  |
| C(4)  | 5955(4)  | 4093(3) | -2395(4) | 29(1)  |
| C(26) | 5898(4)  | 3462(3) | 4492(4)  | 30(1)  |
| C(6)  | 6548(4)  | 4135(3) | -2953(4) | 31(1)  |
| C(3)  | 6159(4)  | 3950(4) | -1467(5) | 34(2)  |
| C(40) | 12601(4) | 3433(3) | 4049(5)  | 34(2)  |
| C(33) | 11513(4) | 736(3)  | 6179(4)  | 30(1)  |
| C(28) | 6303(4)  | 4083(3) | 4400(4)  | 29(1)  |
| C(10) | 6232(4)  | 3948(4) | 1533(5)  | 36(2)  |
| C(18) | 9960(4)  | 5195(3) | 2618(4)  | 25(1)  |
| C(11) | 5909(4)  | 3398(4) | 1968(5)  | 38(2)  |
| C(27) | 5017(5)  | 3423(4) | 4237(5)  | 47(2)  |
| C(5)  | 5104(5)  | 4170(4) | -2766(5) | 42(2)  |
| C(12) | 6403(4)  | 2885(3) | 2398(5)  | 33(2)  |
| CI(1) | 3714(2)  | 4111(1) | 1743(2)  | 68(1)  |
| CI(2) | 3721(2)  | 3027(2) | 409(2)   | 100(1) |
| CI(3) | 4078(2)  | 4435(2) | -59(2)   | 95(1)  |
| C(42) | 3516(5)  | 3906(4) | 566(6)   | 54(2)  |
| CI(4) | 2168(1)  | 939(1)  | 3201(2)  | 58(1)  |
| CI(5) | 3036(2)  | 2104(1) | 2554(3)  | 103(1) |
| CI(6) | 2693(2)  | 951(2)  | 1394(2)  | 117(1) |
| C(43) | 2909(5)  | 1193(4) | 2536(6)  | 49(2)  |

Table S12. Bond lengths [Å] and angles [°] for **5**.

|               |            |             |          |
|---------------|------------|-------------|----------|
| Au(1)-P(1)    | 2.2586(13) | C(2)-H(2)   | 0.9500   |
| Au(1)-S(1)    | 2.3025(13) | C(24)-C(25) | 1.382(9) |
| Au(1)-Au(2)#1 | 3.2070(3)  | C(24)-H(24) | 0.9500   |
| Au(2)-P(2)    | 2.2718(14) | C(9)-C(10)  | 1.381(9) |
| Au(2)-S(2)    | 2.3011(14) | C(9)-C(8)   | 1.391(8) |
| S(1)-C(1)     | 1.777(6)   | C(9)-H(9)   | 0.9500   |
| S(2)-C(23)    | 1.769(6)   | C(8)-C(13)  | 1.379(8) |
| P(2)-C(30)    | 1.809(5)   | C(41)-C(40) | 1.396(9) |
| P(2)-C(36)    | 1.817(6)   | C(41)-H(41) | 0.9500   |
| P(2)-C(22)    | 1.831(5)   | C(14)-C(19) | 1.393(8) |
| P(1)-C(20)    | 1.813(5)   | C(14)-C(15) | 1.395(8) |
| P(1)-C(8)     | 1.815(6)   | C(15)-C(16) | 1.396(8) |
| P(1)-C(14)    | 1.818(5)   | C(15)-H(15) | 0.9500   |
| F(1)-C(5)     | 1.329(8)   | C(1)-C(7)   | 1.380(8) |
| F(4)-C(27)    | 1.351(9)   | C(35)-C(34) | 1.381(8) |
| F(5)-C(27)    | 1.318(9)   | C(35)-H(35) | 0.9500   |
| F(2)-C(5)     | 1.319(8)   | C(29)-C(28) | 1.397(8) |
| F(3)-C(5)     | 1.337(8)   | C(29)-H(29) | 0.9500   |
| F(6)-C(27)    | 1.325(9)   | C(39)-C(40) | 1.370(9) |
| C(20)-C(21)   | 1.540(8)   | C(39)-C(38) | 1.386(9) |
| C(20)-H(20A)  | 0.9900     | C(39)-H(39) | 0.9500   |
| C(20)-H(20B)  | 0.9900     | C(17)-C(16) | 1.363(9) |
| C(37)-C(38)   | 1.382(8)   | C(17)-C(18) | 1.387(9) |
| C(37)-C(36)   | 1.396(8)   | C(17)-H(17) | 0.9500   |
| C(37)-H(37)   | 0.9500     | C(19)-C(18) | 1.391(8) |
| C(30)-C(31)   | 1.386(8)   | C(19)-H(19) | 0.9500   |
| C(30)-C(35)   | 1.400(8)   | C(32)-C(33) | 1.376(9) |
| C(36)-C(41)   | 1.387(8)   | C(32)-H(32) | 0.9500   |
| C(23)-C(29)   | 1.384(8)   | C(7)-C(6)   | 1.384(9) |
| C(23)-C(24)   | 1.389(8)   | C(7)-H(7)   | 0.9500   |
| C(31)-C(32)   | 1.390(8)   | C(16)-H(16) | 0.9500   |
| C(31)-H(31)   | 0.9500     | C(13)-C(12) | 1.401(9) |
| C(21)-C(22)   | 1.541(7)   | C(13)-H(13) | 0.9500   |
| C(21)-H(21A)  | 0.9900     | C(34)-C(33) | 1.388(9) |
| C(21)-H(21B)  | 0.9900     | C(34)-H(34) | 0.9500   |
| C(22)-H(22A)  | 0.9900     | C(38)-H(38) | 0.9500   |
| C(22)-H(22B)  | 0.9900     | C(25)-C(26) | 1.374(9) |
| C(2)-C(1)     | 1.390(8)   | C(25)-H(25) | 0.9500   |
| C(2)-C(3)     | 1.392(9)   | C(4)-C(6)   | 1.383(9) |

|                    |            |
|--------------------|------------|
| C(4)-C(3)          | 1.391(9)   |
| C(4)-C(5)          | 1.480(10)  |
| C(26)-C(28)        | 1.385(9)   |
| C(26)-C(27)        | 1.494(10)  |
| C(6)-H(6)          | 0.9500     |
| C(3)-H(3)          | 0.9500     |
| C(40)-H(40)        | 0.9500     |
| C(33)-H(33)        | 0.9500     |
| C(28)-H(28)        | 0.9500     |
| C(10)-C(11)        | 1.379(10)  |
| C(10)-H(10)        | 0.9500     |
| C(18)-H(18)        | 0.9500     |
| C(11)-C(12)        | 1.385(10)  |
| C(11)-H(11)        | 0.9500     |
| C(12)-H(12)        | 0.9500     |
| Cl(1)-C(42)        | 1.766(8)   |
| Cl(2)-C(42)        | 1.734(9)   |
| Cl(3)-C(42)        | 1.734(9)   |
| C(42)-H(42)        | 1.0000     |
| Cl(4)-C(43)        | 1.761(8)   |
| Cl(5)-C(43)        | 1.749(8)   |
| Cl(6)-C(43)        | 1.736(8)   |
| C(43)-H(43)        | 1.0000     |
|                    |            |
| P(1)-Au(1)-S(1)    | 169.92(5)  |
| P(1)-Au(1)-Au(2)#1 | 103.39(4)  |
| S(1)-Au(1)-Au(2)#1 | 85.65(4)   |
| P(2)-Au(2)-S(2)    | 165.83(5)  |
| P(2)-Au(2)-Au(1)#2 | 94.37(3)   |
| S(2)-Au(2)-Au(1)#2 | 96.79(4)   |
| C(1)-S(1)-Au(1)    | 106.10(19) |
| C(23)-S(2)-Au(2)   | 112.47(18) |
| C(30)-P(2)-C(36)   | 105.8(3)   |
| C(30)-P(2)-C(22)   | 105.7(2)   |
| C(36)-P(2)-C(22)   | 102.4(2)   |
| C(30)-P(2)-Au(2)   | 111.22(18) |
| C(36)-P(2)-Au(2)   | 112.36(18) |
| C(22)-P(2)-Au(2)   | 118.27(19) |
| C(20)-P(1)-C(8)    | 104.5(3)   |
| C(20)-P(1)-C(14)   | 104.6(2)   |
| C(8)-P(1)-C(14)    | 106.2(3)   |
| C(20)-P(1)-Au(1)   | 118.02(18) |

|                     |            |
|---------------------|------------|
| C(8)-P(1)-Au(1)     | 108.26(18) |
| C(14)-P(1)-Au(1)    | 114.19(18) |
| C(21)-C(20)-P(1)    | 112.7(4)   |
| C(21)-C(20)-H(20A)  | 109.1      |
| P(1)-C(20)-H(20A)   | 109.1      |
| C(21)-C(20)-H(20B)  | 109.1      |
| P(1)-C(20)-H(20B)   | 109.1      |
| H(20A)-C(20)-H(20B) | 107.8      |
| C(38)-C(37)-C(36)   | 120.3(6)   |
| C(38)-C(37)-H(37)   | 119.8      |
| C(36)-C(37)-H(37)   | 119.8      |
| C(31)-C(30)-C(35)   | 118.4(5)   |
| C(31)-C(30)-P(2)    | 122.1(4)   |
| C(35)-C(30)-P(2)    | 119.2(4)   |
| C(41)-C(36)-C(37)   | 119.4(5)   |
| C(41)-C(36)-P(2)    | 120.5(4)   |
| C(37)-C(36)-P(2)    | 119.9(4)   |
| C(29)-C(23)-C(24)   | 118.2(6)   |
| C(29)-C(23)-S(2)    | 118.9(4)   |
| C(24)-C(23)-S(2)    | 122.4(4)   |
| C(30)-C(31)-C(32)   | 120.5(6)   |
| C(30)-C(31)-H(31)   | 119.8      |
| C(32)-C(31)-H(31)   | 119.8      |
| C(20)-C(21)-C(22)   | 111.5(4)   |
| C(20)-C(21)-H(21A)  | 109.3      |
| C(22)-C(21)-H(21A)  | 109.3      |
| C(20)-C(21)-H(21B)  | 109.3      |
| C(22)-C(21)-H(21B)  | 109.3      |
| H(21A)-C(21)-H(21B) | 108.0      |
| C(21)-C(22)-P(2)    | 112.2(4)   |
| C(21)-C(22)-H(22A)  | 109.2      |
| P(2)-C(22)-H(22A)   | 109.2      |
| C(21)-C(22)-H(22B)  | 109.2      |
| P(2)-C(22)-H(22B)   | 109.2      |
| H(22A)-C(22)-H(22B) | 107.9      |
| C(1)-C(2)-C(3)      | 120.9(6)   |
| C(1)-C(2)-H(2)      | 119.5      |
| C(3)-C(2)-H(2)      | 119.5      |
| C(25)-C(24)-C(23)   | 120.7(6)   |
| C(25)-C(24)-H(24)   | 119.6      |
| C(23)-C(24)-H(24)   | 119.6      |
| C(10)-C(9)-C(8)     | 120.5(6)   |

|                   |          |
|-------------------|----------|
| C(10)-C(9)-H(9)   | 119.8    |
| C(8)-C(9)-H(9)    | 119.8    |
| C(13)-C(8)-C(9)   | 119.3(6) |
| C(13)-C(8)-P(1)   | 122.3(5) |
| C(9)-C(8)-P(1)    | 118.2(4) |
| C(36)-C(41)-C(40) | 119.8(5) |
| C(36)-C(41)-H(41) | 120.1    |
| C(40)-C(41)-H(41) | 120.1    |
| C(19)-C(14)-C(15) | 120.2(5) |
| C(19)-C(14)-P(1)  | 120.0(4) |
| C(15)-C(14)-P(1)  | 119.6(4) |
| C(14)-C(15)-C(16) | 119.0(6) |
| C(14)-C(15)-H(15) | 120.5    |
| C(16)-C(15)-H(15) | 120.5    |
| C(7)-C(1)-C(2)    | 118.7(6) |
| C(7)-C(1)-S(1)    | 117.2(4) |
| C(2)-C(1)-S(1)    | 124.0(5) |
| C(34)-C(35)-C(30) | 120.7(5) |
| C(34)-C(35)-H(35) | 119.6    |
| C(30)-C(35)-H(35) | 119.6    |
| C(23)-C(29)-C(28) | 121.6(6) |
| C(23)-C(29)-H(29) | 119.2    |
| C(28)-C(29)-H(29) | 119.2    |
| C(40)-C(39)-C(38) | 120.3(6) |
| C(40)-C(39)-H(39) | 119.9    |
| C(38)-C(39)-H(39) | 119.9    |
| C(16)-C(17)-C(18) | 120.9(6) |
| C(16)-C(17)-H(17) | 119.6    |
| C(18)-C(17)-H(17) | 119.6    |
| C(18)-C(19)-C(14) | 119.7(5) |
| C(18)-C(19)-H(19) | 120.2    |
| C(14)-C(19)-H(19) | 120.2    |
| C(33)-C(32)-C(31) | 120.8(6) |
| C(33)-C(32)-H(32) | 119.6    |
| C(31)-C(32)-H(32) | 119.6    |
| C(1)-C(7)-C(6)    | 120.7(6) |
| C(1)-C(7)-H(7)    | 119.6    |
| C(6)-C(7)-H(7)    | 119.6    |
| C(17)-C(16)-C(15) | 120.5(6) |
| C(17)-C(16)-H(16) | 119.7    |
| C(15)-C(16)-H(16) | 119.7    |
| C(8)-C(13)-C(12)  | 120.3(6) |

|                   |          |
|-------------------|----------|
| C(8)-C(13)-H(13)  | 119.9    |
| C(12)-C(13)-H(13) | 119.9    |
| C(35)-C(34)-C(33) | 120.4(6) |
| C(35)-C(34)-H(34) | 119.8    |
| C(33)-C(34)-H(34) | 119.8    |
| C(37)-C(38)-C(39) | 119.9(6) |
| C(37)-C(38)-H(38) | 120.1    |
| C(39)-C(38)-H(38) | 120.1    |
| C(26)-C(25)-C(24) | 120.4(6) |
| C(26)-C(25)-H(25) | 119.8    |
| C(24)-C(25)-H(25) | 119.8    |
| C(6)-C(4)-C(3)    | 119.2(6) |
| C(6)-C(4)-C(5)    | 121.7(6) |
| C(3)-C(4)-C(5)    | 119.0(6) |
| C(25)-C(26)-C(28) | 120.4(6) |
| C(25)-C(26)-C(27) | 118.8(6) |
| C(28)-C(26)-C(27) | 120.7(6) |
| C(7)-C(6)-C(4)    | 120.7(6) |
| C(7)-C(6)-H(6)    | 119.7    |
| C(4)-C(6)-H(6)    | 119.7    |
| C(4)-C(3)-C(2)    | 119.7(6) |
| C(4)-C(3)-H(3)    | 120.2    |
| C(2)-C(3)-H(3)    | 120.2    |
| C(39)-C(40)-C(41) | 120.3(6) |
| C(39)-C(40)-H(40) | 119.8    |
| C(41)-C(40)-H(40) | 119.8    |
| C(32)-C(33)-C(34) | 119.2(5) |
| C(32)-C(33)-H(33) | 120.4    |
| C(34)-C(33)-H(33) | 120.4    |
| C(26)-C(28)-C(29) | 118.6(6) |
| C(26)-C(28)-H(28) | 120.7    |
| C(29)-C(28)-H(28) | 120.7    |
| C(11)-C(10)-C(9)  | 120.4(6) |
| C(11)-C(10)-H(10) | 119.8    |
| C(9)-C(10)-H(10)  | 119.8    |
| C(17)-C(18)-C(19) | 119.6(6) |
| C(17)-C(18)-H(18) | 120.2    |
| C(19)-C(18)-H(18) | 120.2    |
| C(10)-C(11)-C(12) | 119.8(6) |
| C(10)-C(11)-H(11) | 120.1    |
| C(12)-C(11)-H(11) | 120.1    |
| F(5)-C(27)-F(6)   | 106.5(7) |

|                   |          |
|-------------------|----------|
| F(5)-C(27)-F(4)   | 104.9(7) |
| F(6)-C(27)-F(4)   | 105.7(7) |
| F(5)-C(27)-C(26)  | 113.3(6) |
| F(6)-C(27)-C(26)  | 113.6(7) |
| F(4)-C(27)-C(26)  | 112.1(7) |
| F(2)-C(5)-F(1)    | 106.4(6) |
| F(2)-C(5)-F(3)    | 105.3(7) |
| F(1)-C(5)-F(3)    | 106.3(6) |
| F(2)-C(5)-C(4)    | 113.0(6) |
| F(1)-C(5)-C(4)    | 112.6(6) |
| F(3)-C(5)-C(4)    | 112.5(6) |
| C(11)-C(12)-C(13) | 119.7(6) |
| C(11)-C(12)-H(12) | 120.1    |

|                   |          |
|-------------------|----------|
| C(13)-C(12)-H(12) | 120.1    |
| Cl(2)-C(42)-Cl(3) | 111.0(5) |
| Cl(2)-C(42)-Cl(1) | 109.3(5) |
| Cl(3)-C(42)-Cl(1) | 110.2(5) |
| Cl(2)-C(42)-H(42) | 108.8    |
| Cl(3)-C(42)-H(42) | 108.8    |
| Cl(1)-C(42)-H(42) | 108.8    |
| Cl(6)-C(43)-Cl(5) | 106.8(5) |
| Cl(6)-C(43)-Cl(4) | 113.0(5) |
| Cl(5)-C(43)-Cl(4) | 111.1(4) |
| Cl(6)-C(43)-H(43) | 108.6    |
| Cl(5)-C(43)-H(43) | 108.6    |
| Cl(4)-C(43)-H(43) | 108.6    |

Table S13. Crystal data and structure refinement for **9**.

|                                   |                                             |                               |
|-----------------------------------|---------------------------------------------|-------------------------------|
| Identification code               | <b>9</b>                                    |                               |
| Empirical formula                 | $C_{39} H_{33} Au_2 F_2 P_2 S_2$            |                               |
| Formula weight                    | 1059.65                                     |                               |
| Temperature                       | 130(2) K                                    |                               |
| Wavelength                        | 0.71073 Å                                   |                               |
| Crystal system                    | Triclinic                                   |                               |
| Space group                       | P -1                                        |                               |
| Unit cell dimensions              | a = 8.7519(5) Å                             | $\alpha = 93.371(5)^\circ$ .  |
|                                   | b = 11.6131(7) Å                            | $\beta = 92.386(4)^\circ$ .   |
|                                   | c = 17.9964(10) Å                           | $\gamma = 108.178(5)^\circ$ . |
| Volume                            | 1731.33(18) Å <sup>3</sup>                  |                               |
| Z                                 | 2                                           |                               |
| Density (calculated)              | 2.033 Mg/m <sup>3</sup>                     |                               |
| Absorption coefficient            | 8.717 mm <sup>-1</sup>                      |                               |
| F(000)                            | 1010                                        |                               |
| Crystal size                      | 0.460 x 0.370 x 0.350 mm <sup>3</sup>       |                               |
| Theta range for data collection   | 3.439 to 30.206°.                           |                               |
| Index ranges                      | -11 ≤ h ≤ 11, -16 ≤ k ≤ 15, -21 ≤ l ≤ 22    |                               |
| Reflections collected             | 17088                                       |                               |
| Independent reflections           | 8092 [R(int) = 0.1130]                      |                               |
| Completeness to theta = 25.242°   | 99.7 %                                      |                               |
| Refinement method                 | Full-matrix least-squares on F <sup>2</sup> |                               |
| Data / restraints / parameters    | 8092 / 0 / 433                              |                               |
| Goodness-of-fit on F <sup>2</sup> | 0.953                                       |                               |
| Final R indices [I > 2σ(I)]       | R1 = 0.0539, wR2 = 0.1230                   |                               |
| R indices (all data)              | R1 = 0.0886, wR2 = 0.1609                   |                               |
| Largest diff. peak and hole       | 4.006 and -4.769 e.Å <sup>-3</sup>          |                               |

Table S14. Atomic coordinates ( $\times 10^4$ ) and equivalent isotropic displacement parameters ( $\text{\AA}^2 \times 10^3$ ) for **9**.  $U(\text{eq})$  is defined as one third of the trace of the orthogonalized  $U^{ij}$  tensor.

|       | x         | y         | z       | U(eq) |
|-------|-----------|-----------|---------|-------|
| Au(1) | 1185(1)   | 4434(1)   | 1846(1) | 20(1) |
| Au(2) | -5484(1)  | 6243(1)   | 2501(1) | 21(1) |
| C(1)  | 3659(12)  | 2784(9)   | 1664(5) | 20(2) |
| C(2)  | 3616(13)  | 2796(10)  | 2444(6) | 26(2) |
| C(3)  | 4572(14)  | 2286(11)  | 2844(7) | 33(3) |
| C(4)  | 5625(15)  | 1767(10)  | 2512(7) | 34(3) |
| C(5)  | 5675(15)  | 1761(11)  | 1751(7) | 37(3) |
| C(6)  | 4707(14)  | 2245(10)  | 1330(6) | 29(2) |
| C(7)  | -1002(12) | 4531(10)  | 3345(5) | 21(2) |
| C(8)  | -2327(13) | 4631(10)  | 3710(6) | 27(2) |
| C(9)  | -2693(14) | 4127(12)  | 4375(6) | 35(3) |
| C(10) | -1803(15) | 3445(12)  | 4698(7) | 38(3) |
| C(11) | -487(15)  | 3328(11)  | 4310(7) | 39(3) |
| C(12) | -89(14)   | 3858(11)  | 3659(6) | 32(3) |
| C(13) | 469(12)   | 6886(10)  | 2784(6) | 23(2) |
| C(14) | 52(13)    | 7422(10)  | 3424(6) | 26(2) |
| C(15) | 639(14)   | 8668(11)  | 3598(7) | 34(3) |
| C(16) | 1636(14)  | 9400(11)  | 3118(6) | 30(3) |
| C(17) | 2058(14)  | 8873(12)  | 2479(7) | 35(3) |
| C(18) | 1467(12)  | 7651(11)  | 2310(6) | 26(2) |
| C(19) | -2286(12) | 5192(10)  | 1988(6) | 24(2) |
| C(20) | -2030(12) | 5889(11)  | 1279(5) | 25(2) |
| C(21) | -3620(12) | 5962(10)  | 892(5)  | 22(2) |
| C(22) | -4821(13) | 7267(11)  | 4110(6) | 30(3) |
| C(23) | -3548(15) | 7434(11)  | 4607(6) | 32(3) |
| C(24) | -2697(16) | 8563(13)  | 4907(7) | 42(3) |
| C(25) | -3003(16) | 9605(13)  | 4700(7) | 43(3) |
| C(26) | -4308(17) | 9437(13)  | 4208(6) | 43(3) |
| C(27) | -5232(14) | 8271(12)  | 3926(6) | 35(3) |
| C(28) | -2868(12) | 8385(10)  | 1592(6) | 25(2) |
| C(29) | -1843(13) | 8842(10)  | 1036(6) | 28(2) |
| C(30) | -652(15)  | 9934(12)  | 1158(7) | 39(3) |
| C(31) | -434(15)  | 10592(12) | 1848(8) | 45(3) |
| C(32) | -1433(14) | 10135(11) | 2394(7) | 38(3) |
| C(33) | -2645(12) | 9012(10)  | 2277(6) | 25(2) |
| C(34) | -5910(12) | 7321(10)  | 792(5)  | 20(2) |
| C(35) | -7123(13) | 6406(9)   | 394(5)  | 22(2) |



|       |           |          |          |       |
|-------|-----------|----------|----------|-------|
| C(36) | -8302(13) | 6689(11) | -31(6)   | 27(2) |
| C(37) | -8284(14) | 7879(11) | -75(6)   | 33(3) |
| C(38) | -7061(14) | 8810(12) | 316(7)   | 38(3) |
| C(39) | -5884(14) | 8522(10) | 742(6)   | 27(2) |
| F(2)  | -1374(11) | 8740(9)  | 5375(6)  | 80(3) |
| P(1)  | -403(3)   | 5284(3)  | 2504(1)  | 20(1) |
| P(2)  | -4478(3)  | 6965(3)  | 1423(1)  | 20(1) |
| S(1)  | 2451(3)   | 3379(3)  | 1090(1)  | 24(1) |
| S(2)  | -5951(3)  | 5783(3)  | 3719(2)  | 30(1) |
| F(1)  | 4408(11)  | 2223(8)  | 3575(4)  | 36(2) |
| F(1A) | 6540(30)  | 1230(30) | 1448(18) | 47(8) |

Table S15. Bond lengths [ $\text{\AA}$ ] and angles [ $^\circ$ ] for **9**.

|               |           |              |           |
|---------------|-----------|--------------|-----------|
| Au(1)-P(1)    | 2.272(2)  | C(17)-C(18)  | 1.361(16) |
| Au(1)-S(1)    | 2.314(2)  | C(17)-H(17)  | 0.9500    |
| Au(1)-Au(2)#1 | 3.1475(6) | C(18)-H(18)  | 0.9500    |
| Au(2)-P(2)    | 2.263(3)  | C(19)-C(20)  | 1.538(15) |
| Au(2)-S(2)    | 2.309(3)  | C(19)-P(1)   | 1.827(10) |
| Au(2)-Au(1)#2 | 3.1475(6) | C(19)-H(19A) | 0.9900    |
| C(1)-C(6)     | 1.398(14) | C(19)-H(19B) | 0.9900    |
| C(1)-C(2)     | 1.404(14) | C(20)-C(21)  | 1.559(14) |
| C(1)-S(1)     | 1.766(10) | C(20)-H(20A) | 0.9900    |
| C(2)-C(3)     | 1.371(16) | C(20)-H(20B) | 0.9900    |
| C(2)-H(2)     | 0.9500    | C(21)-P(2)   | 1.819(10) |
| C(3)-F(1)     | 1.332(14) | C(21)-H(21A) | 0.9900    |
| C(3)-C(4)     | 1.386(17) | C(21)-H(21B) | 0.9900    |
| C(4)-C(5)     | 1.372(17) | C(22)-C(23)  | 1.356(15) |
| C(4)-H(4)     | 0.9500    | C(22)-C(27)  | 1.377(17) |
| C(5)-F(1A)    | 1.24(3)   | C(22)-S(2)   | 1.783(12) |
| C(5)-C(6)     | 1.380(16) | C(23)-C(24)  | 1.356(18) |
| C(6)-H(6)     | 0.9500    | C(23)-H(23)  | 0.9500    |
| C(7)-C(8)     | 1.388(14) | C(24)-F(2)   | 1.358(14) |
| C(7)-C(12)    | 1.404(15) | C(24)-C(25)  | 1.386(18) |
| C(7)-P(1)     | 1.808(10) | C(25)-C(26)  | 1.372(17) |
| C(8)-C(9)     | 1.369(16) | C(25)-H(25)  | 0.9500    |
| C(8)-H(8)     | 0.9500    | C(26)-C(27)  | 1.396(18) |
| C(9)-C(10)    | 1.405(17) | C(26)-H(26)  | 0.9500    |
| C(9)-H(9)     | 0.9500    | C(27)-H(27)  | 0.9500    |
| C(10)-C(11)   | 1.410(16) | C(28)-C(33)  | 1.369(15) |
| C(10)-H(10)   | 0.9500    | C(28)-C(29)  | 1.388(15) |
| C(11)-C(12)   | 1.363(17) | C(28)-P(2)   | 1.803(11) |
| C(11)-H(11)   | 0.9500    | C(29)-C(30)  | 1.366(17) |
| C(12)-H(12)   | 0.9500    | C(29)-H(29)  | 0.9500    |
| C(13)-C(14)   | 1.392(13) | C(30)-C(31)  | 1.393(19) |
| C(13)-C(18)   | 1.396(15) | C(30)-H(30)  | 0.9500    |
| C(13)-P(1)    | 1.808(11) | C(31)-C(32)  | 1.362(19) |
| C(14)-C(15)   | 1.387(16) | C(31)-H(31)  | 0.9500    |
| C(14)-H(14)   | 0.9500    | C(32)-C(33)  | 1.399(16) |
| C(15)-C(16)   | 1.385(17) | C(32)-H(32)  | 0.9500    |
| C(15)-H(15)   | 0.9500    | C(33)-H(33)  | 0.9500    |
| C(16)-C(17)   | 1.387(16) | C(34)-C(35)  | 1.383(14) |
| C(16)-H(16)   | 0.9500    | C(34)-C(39)  | 1.396(15) |

|                    |            |
|--------------------|------------|
| C(34)-P(2)         | 1.813(10)  |
| C(35)-C(36)        | 1.391(14)  |
| C(35)-H(35)        | 0.9500     |
| C(36)-C(37)        | 1.384(16)  |
| C(36)-H(36)        | 0.9500     |
| C(37)-C(38)        | 1.392(16)  |
| C(37)-H(37)        | 0.9500     |
| C(38)-C(39)        | 1.394(16)  |
| C(38)-H(38)        | 0.9500     |
| C(39)-H(39)        | 0.9500     |
|                    |            |
| P(1)-Au(1)-S(1)    | 171.54(10) |
| P(1)-Au(1)-Au(2)#1 | 96.89(7)   |
| S(1)-Au(1)-Au(2)#1 | 91.55(7)   |
| P(2)-Au(2)-S(2)    | 167.01(10) |
| P(2)-Au(2)-Au(1)#2 | 98.66(7)   |
| S(2)-Au(2)-Au(1)#2 | 94.31(7)   |
| C(6)-C(1)-C(2)     | 117.4(9)   |
| C(6)-C(1)-S(1)     | 118.7(8)   |
| C(2)-C(1)-S(1)     | 123.9(8)   |
| C(3)-C(2)-C(1)     | 119.9(10)  |
| C(3)-C(2)-H(2)     | 120.0      |
| C(1)-C(2)-H(2)     | 120.0      |
| F(1)-C(3)-C(2)     | 118.5(11)  |
| F(1)-C(3)-C(4)     | 118.8(11)  |
| C(2)-C(3)-C(4)     | 122.6(11)  |
| C(5)-C(4)-C(3)     | 117.5(11)  |
| C(5)-C(4)-H(4)     | 121.2      |
| C(3)-C(4)-H(4)     | 121.2      |
| F(1A)-C(5)-C(4)    | 117.5(18)  |
| F(1A)-C(5)-C(6)    | 120.9(19)  |
| C(4)-C(5)-C(6)     | 121.4(11)  |
| C(5)-C(6)-C(1)     | 121.1(10)  |
| C(5)-C(6)-H(6)     | 119.4      |
| C(1)-C(6)-H(6)     | 119.4      |
| C(8)-C(7)-C(12)    | 118.4(10)  |
| C(8)-C(7)-P(1)     | 121.6(8)   |
| C(12)-C(7)-P(1)    | 120.0(8)   |
| C(9)-C(8)-C(7)     | 120.7(10)  |
| C(9)-C(8)-H(8)     | 119.7      |
| C(7)-C(8)-H(8)     | 119.7      |
| C(8)-C(9)-C(10)    | 122.0(11)  |

|                     |           |
|---------------------|-----------|
| C(8)-C(9)-H(9)      | 119.0     |
| C(10)-C(9)-H(9)     | 119.0     |
| C(9)-C(10)-C(11)    | 116.4(11) |
| C(9)-C(10)-H(10)    | 121.8     |
| C(11)-C(10)-H(10)   | 121.8     |
| C(12)-C(11)-C(10)   | 121.8(11) |
| C(12)-C(11)-H(11)   | 119.1     |
| C(10)-C(11)-H(11)   | 119.1     |
| C(11)-C(12)-C(7)    | 120.7(11) |
| C(11)-C(12)-H(12)   | 119.7     |
| C(7)-C(12)-H(12)    | 119.7     |
| C(14)-C(13)-C(18)   | 117.6(10) |
| C(14)-C(13)-P(1)    | 122.5(8)  |
| C(18)-C(13)-P(1)    | 119.6(8)  |
| C(15)-C(14)-C(13)   | 121.4(11) |
| C(15)-C(14)-H(14)   | 119.3     |
| C(13)-C(14)-H(14)   | 119.3     |
| C(16)-C(15)-C(14)   | 119.5(11) |
| C(16)-C(15)-H(15)   | 120.3     |
| C(14)-C(15)-H(15)   | 120.3     |
| C(15)-C(16)-C(17)   | 119.4(11) |
| C(15)-C(16)-H(16)   | 120.3     |
| C(17)-C(16)-H(16)   | 120.3     |
| C(18)-C(17)-C(16)   | 120.7(12) |
| C(18)-C(17)-H(17)   | 119.6     |
| C(16)-C(17)-H(17)   | 119.6     |
| C(17)-C(18)-C(13)   | 121.3(10) |
| C(17)-C(18)-H(18)   | 119.4     |
| C(13)-C(18)-H(18)   | 119.4     |
| C(20)-C(19)-P(1)    | 113.2(7)  |
| C(20)-C(19)-H(19A)  | 108.9     |
| P(1)-C(19)-H(19A)   | 108.9     |
| C(20)-C(19)-H(19B)  | 108.9     |
| P(1)-C(19)-H(19B)   | 108.9     |
| H(19A)-C(19)-H(19B) | 107.7     |
| C(19)-C(20)-C(21)   | 113.7(8)  |
| C(19)-C(20)-H(20A)  | 108.8     |
| C(21)-C(20)-H(20A)  | 108.8     |
| C(19)-C(20)-H(20B)  | 108.8     |
| C(21)-C(20)-H(20B)  | 108.8     |
| H(20A)-C(20)-H(20B) | 107.7     |
| C(20)-C(21)-P(2)    | 112.4(7)  |

|                     |           |
|---------------------|-----------|
| C(20)-C(21)-H(21A)  | 109.1     |
| P(2)-C(21)-H(21A)   | 109.1     |
| C(20)-C(21)-H(21B)  | 109.1     |
| P(2)-C(21)-H(21B)   | 109.1     |
| H(21A)-C(21)-H(21B) | 107.9     |
| C(23)-C(22)-C(27)   | 118.2(11) |
| C(23)-C(22)-S(2)    | 120.8(10) |
| C(27)-C(22)-S(2)    | 121.0(9)  |
| C(24)-C(23)-C(22)   | 120.7(12) |
| C(24)-C(23)-H(23)   | 119.7     |
| C(22)-C(23)-H(23)   | 119.7     |
| C(23)-C(24)-F(2)    | 120.8(12) |
| C(23)-C(24)-C(25)   | 122.9(11) |
| F(2)-C(24)-C(25)    | 115.9(12) |
| C(26)-C(25)-C(24)   | 116.4(12) |
| C(26)-C(25)-H(25)   | 121.8     |
| C(24)-C(25)-H(25)   | 121.8     |
| C(25)-C(26)-C(27)   | 120.6(12) |
| C(25)-C(26)-H(26)   | 119.7     |
| C(27)-C(26)-H(26)   | 119.7     |
| C(22)-C(27)-C(26)   | 121.0(11) |
| C(22)-C(27)-H(27)   | 119.5     |
| C(26)-C(27)-H(27)   | 119.5     |
| C(33)-C(28)-C(29)   | 119.7(11) |
| C(33)-C(28)-P(2)    | 119.7(9)  |
| C(29)-C(28)-P(2)    | 120.6(8)  |
| C(30)-C(29)-C(28)   | 120.5(11) |
| C(30)-C(29)-H(29)   | 119.7     |
| C(28)-C(29)-H(29)   | 119.7     |
| C(29)-C(30)-C(31)   | 120.2(12) |
| C(29)-C(30)-H(30)   | 119.9     |
| C(31)-C(30)-H(30)   | 119.9     |
| C(32)-C(31)-C(30)   | 119.1(12) |
| C(32)-C(31)-H(31)   | 120.5     |
| C(30)-C(31)-H(31)   | 120.5     |
| C(31)-C(32)-C(33)   | 121.1(12) |
| C(31)-C(32)-H(32)   | 119.5     |

|                   |           |
|-------------------|-----------|
| C(33)-C(32)-H(32) | 119.5     |
| C(28)-C(33)-C(32) | 119.3(11) |
| C(28)-C(33)-H(33) | 120.3     |
| C(32)-C(33)-H(33) | 120.3     |
| C(35)-C(34)-C(39) | 118.5(9)  |
| C(35)-C(34)-P(2)  | 120.8(8)  |
| C(39)-C(34)-P(2)  | 120.4(8)  |
| C(34)-C(35)-C(36) | 120.1(10) |
| C(34)-C(35)-H(35) | 120.0     |
| C(36)-C(35)-H(35) | 120.0     |
| C(37)-C(36)-C(35) | 121.4(11) |
| C(37)-C(36)-H(36) | 119.3     |
| C(35)-C(36)-H(36) | 119.3     |
| C(36)-C(37)-C(38) | 119.2(10) |
| C(36)-C(37)-H(37) | 120.4     |
| C(38)-C(37)-H(37) | 120.4     |
| C(37)-C(38)-C(39) | 119.2(12) |
| C(37)-C(38)-H(38) | 120.4     |
| C(39)-C(38)-H(38) | 120.4     |
| C(38)-C(39)-C(34) | 121.6(10) |
| C(38)-C(39)-H(39) | 119.2     |
| C(34)-C(39)-H(39) | 119.2     |
| C(7)-P(1)-C(13)   | 106.4(5)  |
| C(7)-P(1)-C(19)   | 105.3(5)  |
| C(13)-P(1)-C(19)  | 103.5(5)  |
| C(7)-P(1)-Au(1)   | 111.8(3)  |
| C(13)-P(1)-Au(1)  | 115.7(3)  |
| C(19)-P(1)-Au(1)  | 113.2(3)  |
| C(28)-P(2)-C(34)  | 103.8(5)  |
| C(28)-P(2)-C(21)  | 105.3(5)  |
| C(34)-P(2)-C(21)  | 106.9(5)  |
| C(28)-P(2)-Au(2)  | 111.4(4)  |
| C(34)-P(2)-Au(2)  | 114.6(3)  |
| C(21)-P(2)-Au(2)  | 114.0(4)  |
| C(1)-S(1)-Au(1)   | 108.4(3)  |
| C(22)-S(2)-Au(2)  | 94.5(4)   |

Table S16. Crystal data and structure refinement for **10**.

|                                   |                                                                                              |                 |
|-----------------------------------|----------------------------------------------------------------------------------------------|-----------------|
| Identification code               | <b>10</b>                                                                                    |                 |
| Empirical formula                 | C <sub>39</sub> H <sub>34</sub> Au <sub>2</sub> F <sub>2</sub> P <sub>2</sub> S <sub>2</sub> |                 |
| Formula weight                    | 1060.65                                                                                      |                 |
| Temperature                       | 130(2) K                                                                                     |                 |
| Wavelength                        | 0.71073 Å                                                                                    |                 |
| Crystal system                    | Triclinic                                                                                    |                 |
| Space group                       | P -1                                                                                         |                 |
| Unit cell dimensions              | a = 8.6845(3) Å                                                                              | α = 88.207(4)°. |
|                                   | b = 11.7604(6) Å                                                                             | β = 87.070(3)°. |
|                                   | c = 18.2867(9) Å                                                                             | γ = 71.711(4)°. |
| Volume                            | 1770.79(15) Å <sup>3</sup>                                                                   |                 |
| Z                                 | 2                                                                                            |                 |
| Density (calculated)              | 1.989 Mg/m <sup>3</sup>                                                                      |                 |
| Absorption coefficient            | 8.522 mm <sup>-1</sup>                                                                       |                 |
| F(000)                            | 1012                                                                                         |                 |
| Crystal size                      | 0.230 x 0.120 x 0.080 mm <sup>3</sup>                                                        |                 |
| Theta range for data collection   | 3.402 to 30.136°.                                                                            |                 |
| Index ranges                      | -12 ≤ h ≤ 11, -16 ≤ k ≤ 16, -25 ≤ l ≤ 25                                                     |                 |
| Reflections collected             | 25527                                                                                        |                 |
| Independent reflections           | 9104 [R(int) = 0.0369]                                                                       |                 |
| Completeness to theta = 25.242°   | 99.8 %                                                                                       |                 |
| Refinement method                 | Full-matrix least-squares on F <sup>2</sup>                                                  |                 |
| Data / restraints / parameters    | 9104 / 0 / 424                                                                               |                 |
| Goodness-of-fit on F <sup>2</sup> | 1.053                                                                                        |                 |
| Final R indices [I > 2σ(I)]       | R1 = 0.0270, wR2 = 0.0494                                                                    |                 |
| R indices (all data)              | R1 = 0.0371, wR2 = 0.0538                                                                    |                 |
| Largest diff. peak and hole       | 1.146 and -1.017 e.Å <sup>-3</sup>                                                           |                 |

Table S17. Atomic coordinates ( $\times 10^4$ ) and equivalent isotropic displacement parameters ( $\text{\AA}^2 \times 10^3$ ) for **10**.  $U(\text{eq})$  is defined as one third of the trace of the orthogonalized  $U^{ij}$  tensor.

|       | x        | y        | z       | U(eq) |
|-------|----------|----------|---------|-------|
| C(1)  | 9906(4)  | 1538(4)  | 4095(2) | 23(1) |
| C(2)  | 10059(5) | 2678(4)  | 3972(2) | 31(1) |
| C(3)  | 9088(6)  | 3650(4)  | 4366(2) | 41(1) |
| C(4)  | 7994(6)  | 3461(4)  | 4884(2) | 41(1) |
| C(5)  | 7811(5)  | 2349(4)  | 5022(2) | 36(1) |
| C(6)  | 8760(5)  | 1403(4)  | 4624(2) | 27(1) |
| C(7)  | 10892(4) | 2246(3)  | 741(2)  | 14(1) |
| C(8)  | 12081(4) | 1382(3)  | 337(2)  | 20(1) |
| C(9)  | 13248(4) | 1693(3)  | -91(2)  | 24(1) |
| C(10) | 13251(5) | 2865(4)  | -140(2) | 28(1) |
| C(11) | 12076(5) | 3737(4)  | 249(2)  | 29(1) |
| C(12) | 10912(4) | 3425(3)  | 689(2)  | 25(1) |
| C(13) | 7829(4)  | 3214(3)  | 1527(2) | 18(1) |
| C(14) | 7600(4)  | 3764(3)  | 2199(2) | 23(1) |
| C(15) | 6364(5)  | 4827(4)  | 2312(2) | 30(1) |
| C(16) | 5347(5)  | 5338(4)  | 1756(3) | 34(1) |
| C(17) | 5557(5)  | 4789(4)  | 1089(2) | 30(1) |
| C(18) | 6791(4)  | 3731(3)  | 971(2)  | 24(1) |
| C(19) | 8585(4)  | 885(3)   | 879(2)  | 17(1) |
| C(20) | 7033(4)  | 753(3)   | 1266(2) | 17(1) |
| C(21) | 7326(4)  | -65(3)   | 1942(2) | 18(1) |
| C(22) | 1370(4)  | -2410(3) | 1673(2) | 18(1) |
| C(23) | 1481(4)  | -2449(3) | 2432(2) | 22(1) |
| C(24) | 697(4)   | -3093(4) | 2867(2) | 26(1) |
| C(25) | -220(5)  | -3683(3) | 2543(2) | 28(1) |
| C(26) | -408(5)  | -3629(4) | 1804(2) | 28(1) |
| C(27) | 388(4)   | -2998(3) | 1369(2) | 25(1) |
| C(28) | 4617(4)  | 1445(3)  | 2778(2) | 19(1) |
| C(29) | 3627(4)  | 2295(3)  | 2308(2) | 22(1) |
| C(30) | 3029(5)  | 3491(4)  | 2504(2) | 27(1) |
| C(31) | 3377(5)  | 3849(4)  | 3172(2) | 32(1) |
| C(32) | 4336(5)  | 3013(4)  | 3640(2) | 30(1) |
| C(33) | 4940(5)  | 1819(4)  | 3451(2) | 27(1) |
| C(34) | 6203(4)  | -1058(3) | 3237(2) | 21(1) |
| C(35) | 7457(4)  | -955(4)  | 3647(2) | 25(1) |
| C(36) | 7976(5)  | -1719(4) | 4243(2) | 30(1) |
| C(37) | 7282(5)  | -2603(4) | 4424(2) | 33(1) |

|       |          |          |         |       |
|-------|----------|----------|---------|-------|
| C(38) | 6072(5)  | -2739(4) | 4005(2) | 32(1) |
| C(39) | 5522(4)  | -1973(3) | 3422(2) | 25(1) |
| Au(1) | 10549(1) | 980(1)   | 2441(1) | 16(1) |
| Au(2) | 3815(1)  | -767(1)  | 1796(1) | 16(1) |
| F(1)  | 7049(4)  | 4424(3)  | 5278(2) | 68(1) |
| F(2)  | -938(3)  | -4352(2) | 2981(2) | 45(1) |
| P(1)  | 9482(1)  | 1826(1)  | 1379(1) | 14(1) |
| P(2)  | 5474(1)  | -81(1)   | 2458(1) | 16(1) |
| S(1)  | 11178(1) | 261(1)   | 3612(1) | 25(1) |
| S(2)  | 2446(1)  | -1680(1) | 1073(1) | 21(1) |

Table S18 Bond lengths [ $\text{\AA}$ ] and angles [ $^\circ$ ] for **10**.

|              |          |              |          |
|--------------|----------|--------------|----------|
| C(1)-C(6)    | 1.392(5) | C(19)-H(19B) | 0.9900   |
| C(1)-C(2)    | 1.399(6) | C(20)-C(21)  | 1.524(5) |
| C(1)-S(1)    | 1.789(4) | C(20)-H(20A) | 0.9900   |
| C(2)-C(3)    | 1.386(6) | C(20)-H(20B) | 0.9900   |
| C(2)-H(2)    | 0.9500   | C(21)-P(2)   | 1.828(3) |
| C(3)-C(4)    | 1.370(7) | C(21)-H(21A) | 0.9900   |
| C(3)-H(3)    | 0.9500   | C(21)-H(21B) | 0.9900   |
| C(4)-F(1)    | 1.372(5) | C(22)-C(23)  | 1.394(5) |
| C(4)-C(5)    | 1.380(7) | C(22)-C(27)  | 1.400(5) |
| C(5)-C(6)    | 1.364(6) | C(22)-S(2)   | 1.776(4) |
| C(5)-H(5)    | 0.9500   | C(23)-C(24)  | 1.379(5) |
| C(6)-H(6)    | 0.9500   | C(23)-H(23)  | 0.9500   |
| C(7)-C(12)   | 1.393(5) | C(24)-C(25)  | 1.373(6) |
| C(7)-C(8)    | 1.398(5) | C(24)-H(24)  | 0.9500   |
| C(7)-P(1)    | 1.817(4) | C(25)-F(2)   | 1.366(4) |
| C(8)-C(9)    | 1.381(5) | C(25)-C(26)  | 1.367(6) |
| C(8)-H(8)    | 0.9500   | C(26)-C(27)  | 1.375(6) |
| C(9)-C(10)   | 1.379(5) | C(26)-H(26)  | 0.9500   |
| C(9)-H(9)    | 0.9500   | C(27)-H(27)  | 0.9500   |
| C(10)-C(11)  | 1.383(5) | C(28)-C(33)  | 1.391(5) |
| C(10)-H(10)  | 0.9500   | C(28)-C(29)  | 1.400(5) |
| C(11)-C(12)  | 1.391(5) | C(28)-P(2)   | 1.816(4) |
| C(11)-H(11)  | 0.9500   | C(29)-C(30)  | 1.390(5) |
| C(12)-H(12)  | 0.9500   | C(29)-H(29)  | 0.9500   |
| C(13)-C(14)  | 1.382(5) | C(30)-C(31)  | 1.382(6) |
| C(13)-C(18)  | 1.390(5) | C(30)-H(30)  | 0.9500   |
| C(13)-P(1)   | 1.821(4) | C(31)-C(32)  | 1.378(6) |
| C(14)-C(15)  | 1.382(5) | C(31)-H(31)  | 0.9500   |
| C(14)-H(14)  | 0.9500   | C(32)-C(33)  | 1.384(5) |
| C(15)-C(16)  | 1.377(6) | C(32)-H(32)  | 0.9500   |
| C(15)-H(15)  | 0.9500   | C(33)-H(33)  | 0.9500   |
| C(16)-C(17)  | 1.375(6) | C(34)-C(35)  | 1.391(5) |
| C(16)-H(16)  | 0.9500   | C(34)-C(39)  | 1.407(5) |
| C(17)-C(18)  | 1.378(5) | C(34)-P(2)   | 1.812(4) |
| C(17)-H(17)  | 0.9500   | C(35)-C(36)  | 1.390(5) |
| C(18)-H(18)  | 0.9500   | C(35)-H(35)  | 0.9500   |
| C(19)-C(20)  | 1.539(5) | C(36)-C(37)  | 1.380(6) |
| C(19)-P(1)   | 1.830(3) | C(36)-H(36)  | 0.9500   |
| C(19)-H(19A) | 0.9900   | C(37)-C(38)  | 1.384(6) |



|                   |           |
|-------------------|-----------|
| C(37)-H(37)       | 0.9500    |
| C(38)-C(39)       | 1.377(5)  |
| C(38)-H(38)       | 0.9500    |
| C(39)-H(39)       | 0.9500    |
| Au(1)-P(1)        | 2.2589(9) |
| Au(1)-S(1)        | 2.3049(9) |
| Au(1)-Au(2)#1     | 3.1325(2) |
| Au(2)-P(2)        | 2.2712(9) |
| Au(2)-S(2)        | 2.3162(9) |
|                   |           |
| C(6)-C(1)-C(2)    | 118.5(4)  |
| C(6)-C(1)-S(1)    | 120.0(3)  |
| C(2)-C(1)-S(1)    | 121.5(3)  |
| C(3)-C(2)-C(1)    | 120.6(4)  |
| C(3)-C(2)-H(2)    | 119.7     |
| C(1)-C(2)-H(2)    | 119.7     |
| C(4)-C(3)-C(2)    | 118.4(4)  |
| C(4)-C(3)-H(3)    | 120.8     |
| C(2)-C(3)-H(3)    | 120.8     |
| C(3)-C(4)-F(1)    | 118.1(5)  |
| C(3)-C(4)-C(5)    | 122.6(4)  |
| F(1)-C(4)-C(5)    | 119.3(4)  |
| C(6)-C(5)-C(4)    | 118.4(4)  |
| C(6)-C(5)-H(5)    | 120.8     |
| C(4)-C(5)-H(5)    | 120.8     |
| C(5)-C(6)-C(1)    | 121.5(4)  |
| C(5)-C(6)-H(6)    | 119.2     |
| C(1)-C(6)-H(6)    | 119.2     |
| C(12)-C(7)-C(8)   | 117.9(3)  |
| C(12)-C(7)-P(1)   | 120.8(3)  |
| C(8)-C(7)-P(1)    | 121.1(3)  |
| C(9)-C(8)-C(7)    | 120.7(3)  |
| C(9)-C(8)-H(8)    | 119.7     |
| C(7)-C(8)-H(8)    | 119.7     |
| C(10)-C(9)-C(8)   | 120.8(4)  |
| C(10)-C(9)-H(9)   | 119.6     |
| C(8)-C(9)-H(9)    | 119.6     |
| C(9)-C(10)-C(11)  | 119.5(4)  |
| C(9)-C(10)-H(10)  | 120.3     |
| C(11)-C(10)-H(10) | 120.3     |
| C(10)-C(11)-C(12) | 119.9(4)  |
| C(10)-C(11)-H(11) | 120.0     |

|                     |          |
|---------------------|----------|
| C(12)-C(11)-H(11)   | 120.0    |
| C(11)-C(12)-C(7)    | 121.2(3) |
| C(11)-C(12)-H(12)   | 119.4    |
| C(7)-C(12)-H(12)    | 119.4    |
| C(14)-C(13)-C(18)   | 119.4(3) |
| C(14)-C(13)-P(1)    | 119.9(3) |
| C(18)-C(13)-P(1)    | 120.7(3) |
| C(15)-C(14)-C(13)   | 120.3(4) |
| C(15)-C(14)-H(14)   | 119.8    |
| C(13)-C(14)-H(14)   | 119.8    |
| C(16)-C(15)-C(14)   | 120.0(4) |
| C(16)-C(15)-H(15)   | 120.0    |
| C(14)-C(15)-H(15)   | 120.0    |
| C(17)-C(16)-C(15)   | 120.0(4) |
| C(17)-C(16)-H(16)   | 120.0    |
| C(15)-C(16)-H(16)   | 120.0    |
| C(16)-C(17)-C(18)   | 120.4(4) |
| C(16)-C(17)-H(17)   | 119.8    |
| C(18)-C(17)-H(17)   | 119.8    |
| C(17)-C(18)-C(13)   | 119.9(4) |
| C(17)-C(18)-H(18)   | 120.0    |
| C(13)-C(18)-H(18)   | 120.0    |
| C(20)-C(19)-P(1)    | 112.9(2) |
| C(20)-C(19)-H(19A)  | 109.0    |
| P(1)-C(19)-H(19A)   | 109.0    |
| C(20)-C(19)-H(19B)  | 109.0    |
| P(1)-C(19)-H(19B)   | 109.0    |
| H(19A)-C(19)-H(19B) | 107.8    |
| C(21)-C(20)-C(19)   | 114.5(3) |
| C(21)-C(20)-H(20A)  | 108.6    |
| C(19)-C(20)-H(20A)  | 108.6    |
| C(21)-C(20)-H(20B)  | 108.6    |
| C(19)-C(20)-H(20B)  | 108.6    |
| H(20A)-C(20)-H(20B) | 107.6    |
| C(20)-C(21)-P(2)    | 114.2(2) |
| C(20)-C(21)-H(21A)  | 108.7    |
| P(2)-C(21)-H(21A)   | 108.7    |
| C(20)-C(21)-H(21B)  | 108.7    |
| P(2)-C(21)-H(21B)   | 108.7    |
| H(21A)-C(21)-H(21B) | 107.6    |
| C(23)-C(22)-C(27)   | 118.3(3) |
| C(23)-C(22)-S(2)    | 123.3(3) |

|                   |          |
|-------------------|----------|
| C(27)-C(22)-S(2)  | 118.4(3) |
| C(24)-C(23)-C(22) | 120.7(4) |
| C(24)-C(23)-H(23) | 119.6    |
| C(22)-C(23)-H(23) | 119.6    |
| C(25)-C(24)-C(23) | 119.0(4) |
| C(25)-C(24)-H(24) | 120.5    |
| C(23)-C(24)-H(24) | 120.5    |
| F(2)-C(25)-C(26)  | 119.9(4) |
| F(2)-C(25)-C(24)  | 118.1(4) |
| C(26)-C(25)-C(24) | 122.0(4) |
| C(25)-C(26)-C(27) | 119.0(4) |
| C(25)-C(26)-H(26) | 120.5    |
| C(27)-C(26)-H(26) | 120.5    |
| C(26)-C(27)-C(22) | 120.9(4) |
| C(26)-C(27)-H(27) | 119.6    |
| C(22)-C(27)-H(27) | 119.6    |
| C(33)-C(28)-C(29) | 118.5(3) |
| C(33)-C(28)-P(2)  | 123.5(3) |
| C(29)-C(28)-P(2)  | 117.9(3) |
| C(30)-C(29)-C(28) | 120.3(4) |
| C(30)-C(29)-H(29) | 119.8    |
| C(28)-C(29)-H(29) | 119.8    |
| C(31)-C(30)-C(29) | 120.4(4) |
| C(31)-C(30)-H(30) | 119.8    |
| C(29)-C(30)-H(30) | 119.8    |
| C(32)-C(31)-C(30) | 119.5(4) |
| C(32)-C(31)-H(31) | 120.3    |
| C(30)-C(31)-H(31) | 120.3    |
| C(31)-C(32)-C(33) | 120.8(4) |
| C(31)-C(32)-H(32) | 119.6    |
| C(33)-C(32)-H(32) | 119.6    |
| C(32)-C(33)-C(28) | 120.5(4) |
| C(32)-C(33)-H(33) | 119.7    |
| C(28)-C(33)-H(33) | 119.7    |
| C(35)-C(34)-C(39) | 118.7(3) |
| C(35)-C(34)-P(2)  | 121.9(3) |
| C(39)-C(34)-P(2)  | 119.4(3) |
| C(34)-C(35)-C(36) | 120.1(4) |
| C(34)-C(35)-H(35) | 120.0    |
| C(36)-C(35)-H(35) | 120.0    |
| C(37)-C(36)-C(35) | 120.6(4) |
| C(37)-C(36)-H(36) | 119.7    |

|                    |            |
|--------------------|------------|
| C(35)-C(36)-H(36)  | 119.7      |
| C(36)-C(37)-C(38)  | 119.7(4)   |
| C(36)-C(37)-H(37)  | 120.1      |
| C(38)-C(37)-H(37)  | 120.1      |
| C(39)-C(38)-C(37)  | 120.3(4)   |
| C(39)-C(38)-H(38)  | 119.9      |
| C(37)-C(38)-H(38)  | 119.9      |
| C(38)-C(39)-C(34)  | 120.5(4)   |
| C(38)-C(39)-H(39)  | 119.7      |
| C(34)-C(39)-H(39)  | 119.7      |
| P(1)-Au(1)-S(1)    | 169.88(3)  |
| P(1)-Au(1)-Au(2)#1 | 98.41(2)   |
| S(1)-Au(1)-Au(2)#1 | 91.36(2)   |
| P(2)-Au(2)-S(2)    | 172.02(3)  |
| P(2)-Au(2)-Au(1)#2 | 96.23(2)   |
| S(2)-Au(2)-Au(1)#2 | 91.64(2)   |
| C(7)-P(1)-C(13)    | 104.27(16) |
| C(7)-P(1)-C(19)    | 106.82(16) |
| C(13)-P(1)-C(19)   | 104.52(16) |
| C(7)-P(1)-Au(1)    | 114.96(11) |
| C(13)-P(1)-Au(1)   | 112.05(13) |
| C(19)-P(1)-Au(1)   | 113.30(12) |
| C(34)-P(2)-C(28)   | 108.61(17) |
| C(34)-P(2)-C(21)   | 104.00(16) |
| C(28)-P(2)-C(21)   | 103.62(17) |
| C(34)-P(2)-Au(2)   | 111.21(13) |
| C(28)-P(2)-Au(2)   | 115.67(11) |
| C(21)-P(2)-Au(2)   | 112.85(12) |
| C(1)-S(1)-Au(1)    | 97.69(12)  |
| C(22)-S(2)-Au(2)   | 107.14(12) |

## Lead Thiolates (Pb(SR<sub>F</sub>)<sub>2</sub>) IR Spectra

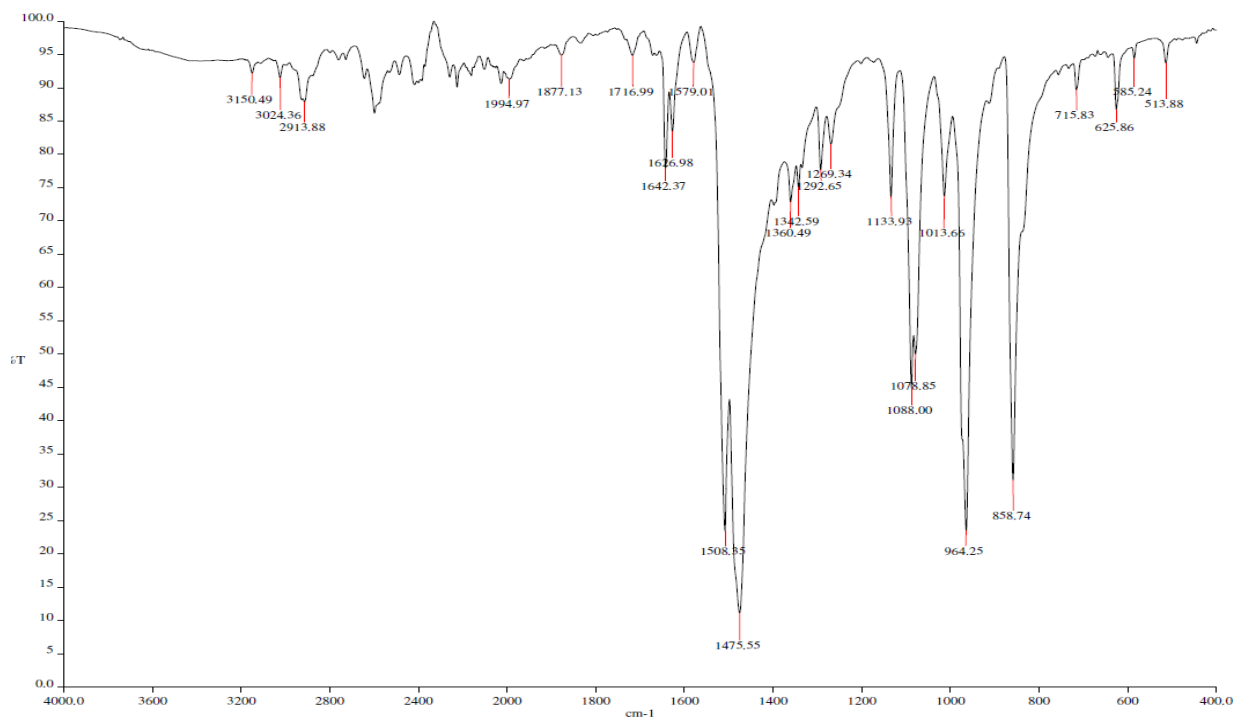

Figure S39. ATR-FTIR Spectra of Pb(SC<sub>6</sub>F<sub>5</sub>)<sub>2</sub>

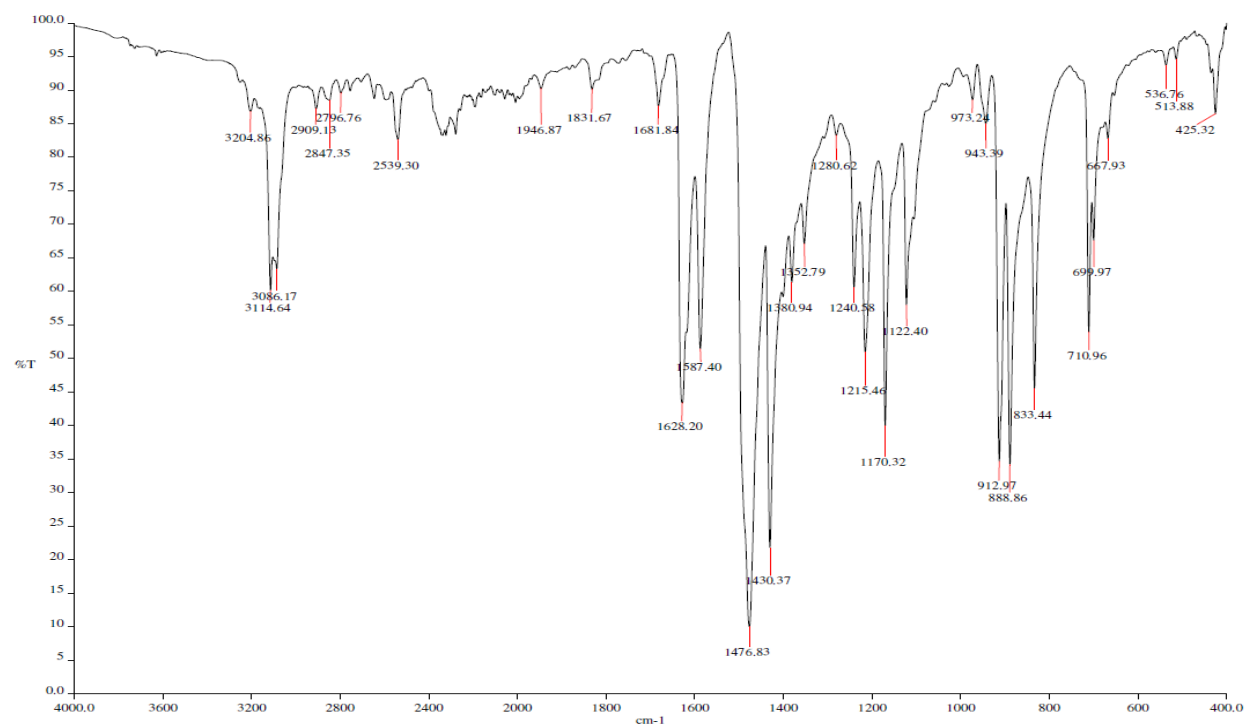

Figure S40. ATR-FTIR Spectra of Pb(SC<sub>6</sub>HF<sub>4-4</sub>)<sub>2</sub>

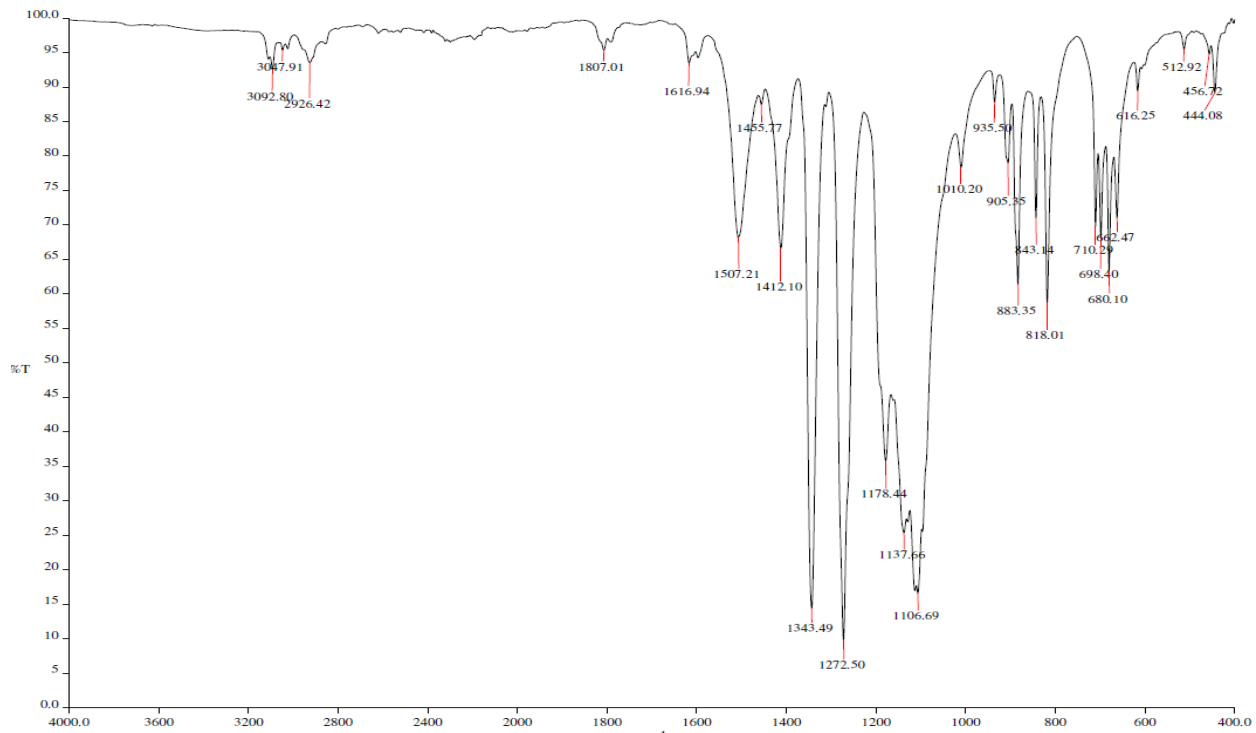

Figure S41. ATR-FTIR Spectra of  $Pb(SC_6H_3(CF_3)_2-3,5)_2$

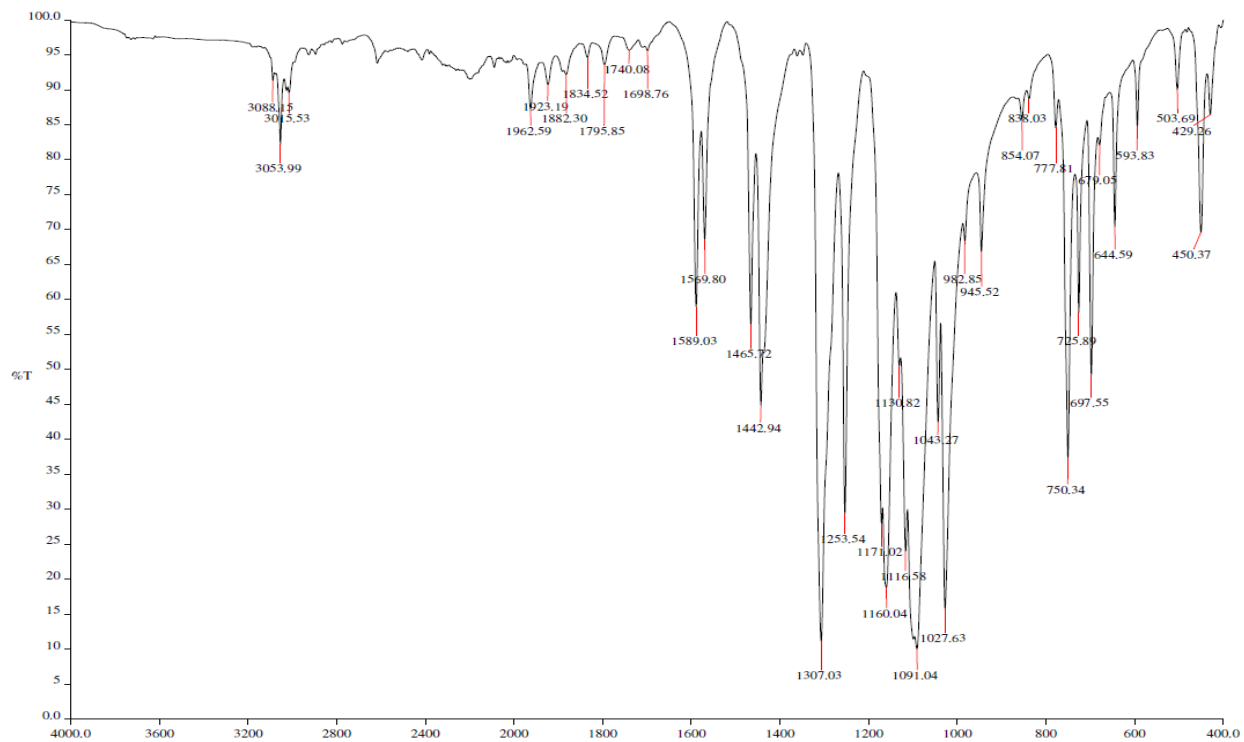

Figure S42. ATR-FTIR Spectra of  $Pb(SC_6H_4(CF_3)_2)_2$

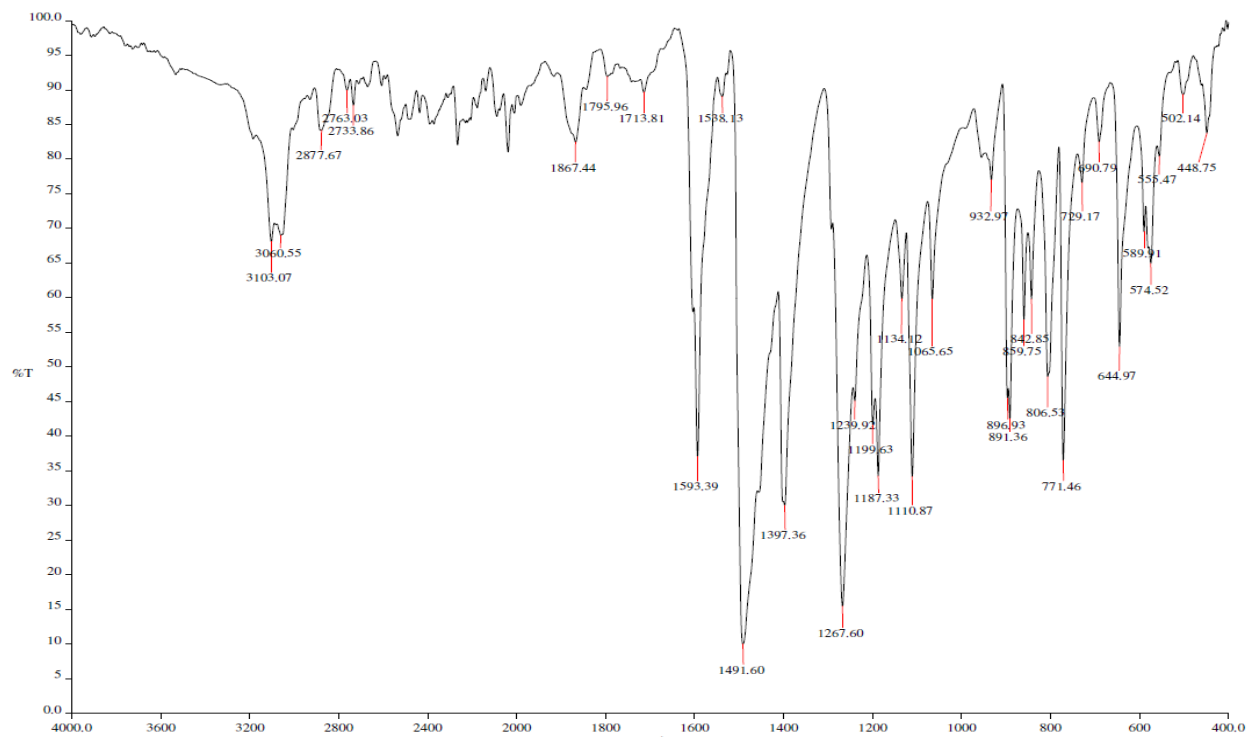

Figure S43. ATR-FTIR Spectra of  $Pb(SC_6H_4(CF_3)-4)_2$

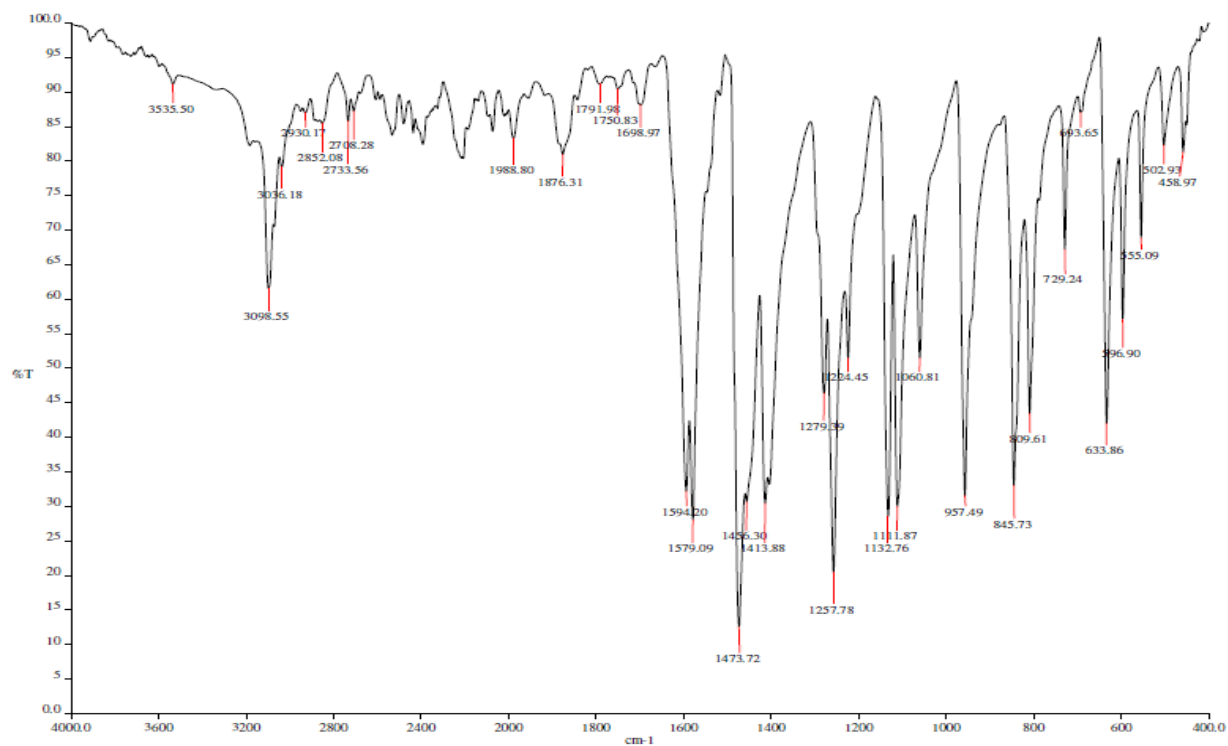

Figure S44. ATR-FTIR Spectra of  $Pb(SC_6H_3F_2-3,4)_2$

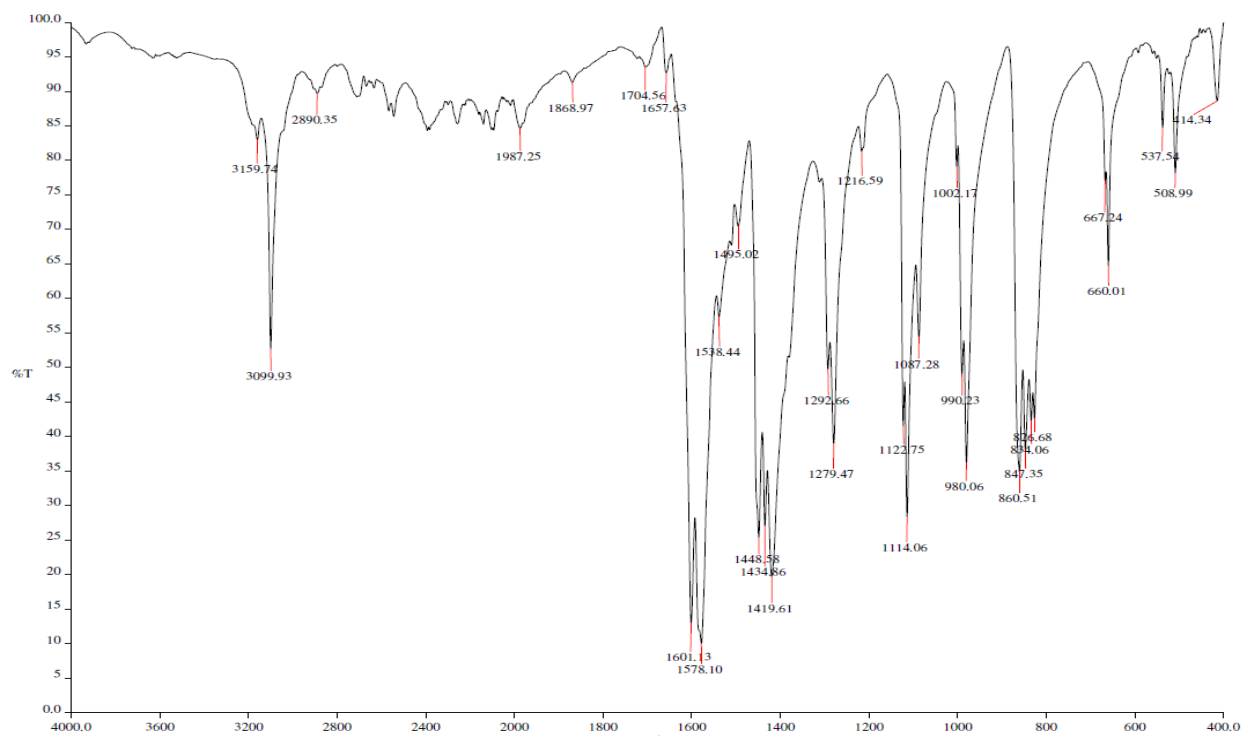

Figure S45. ATR-FTIR Spectra of Pb(SC<sub>6</sub>H<sub>3</sub>F<sub>2</sub>-3,5)<sub>2</sub>

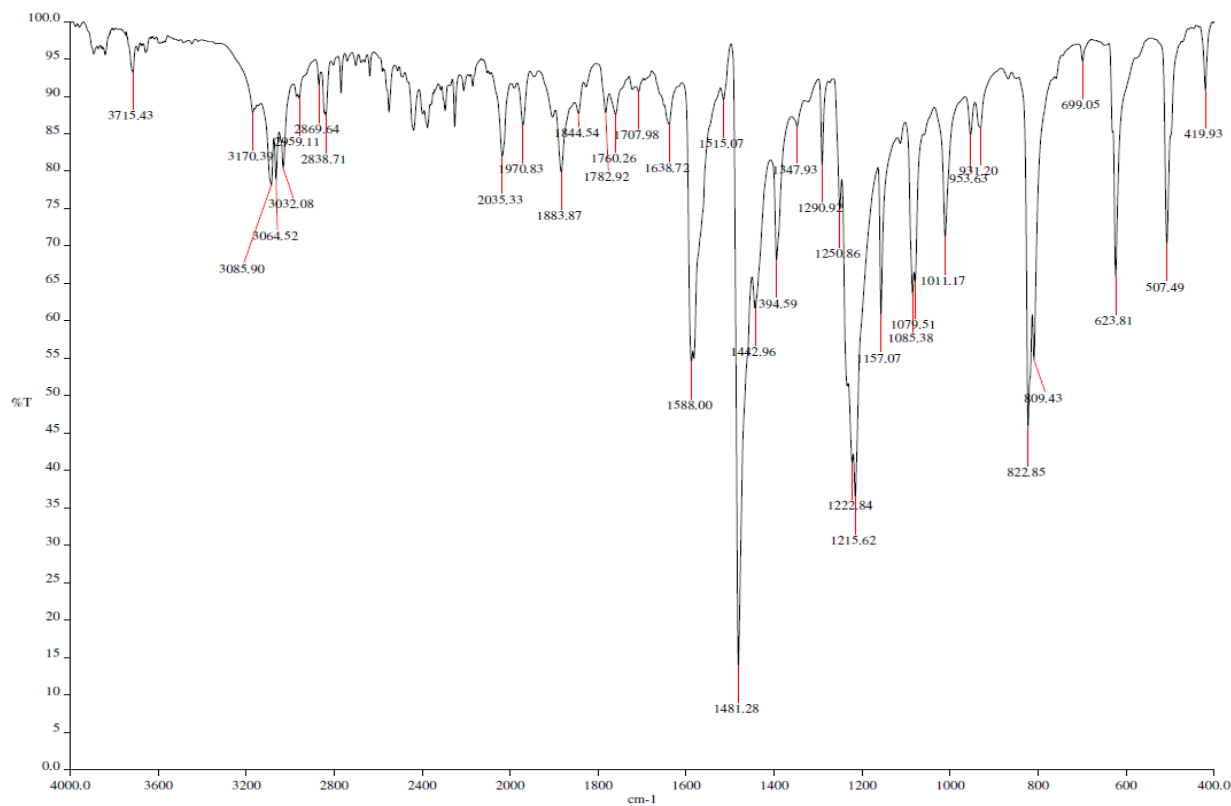

Figure S46. ATR-FTIR Spectra of Pb(SC<sub>6</sub>H<sub>4</sub>F-2)<sub>2</sub>

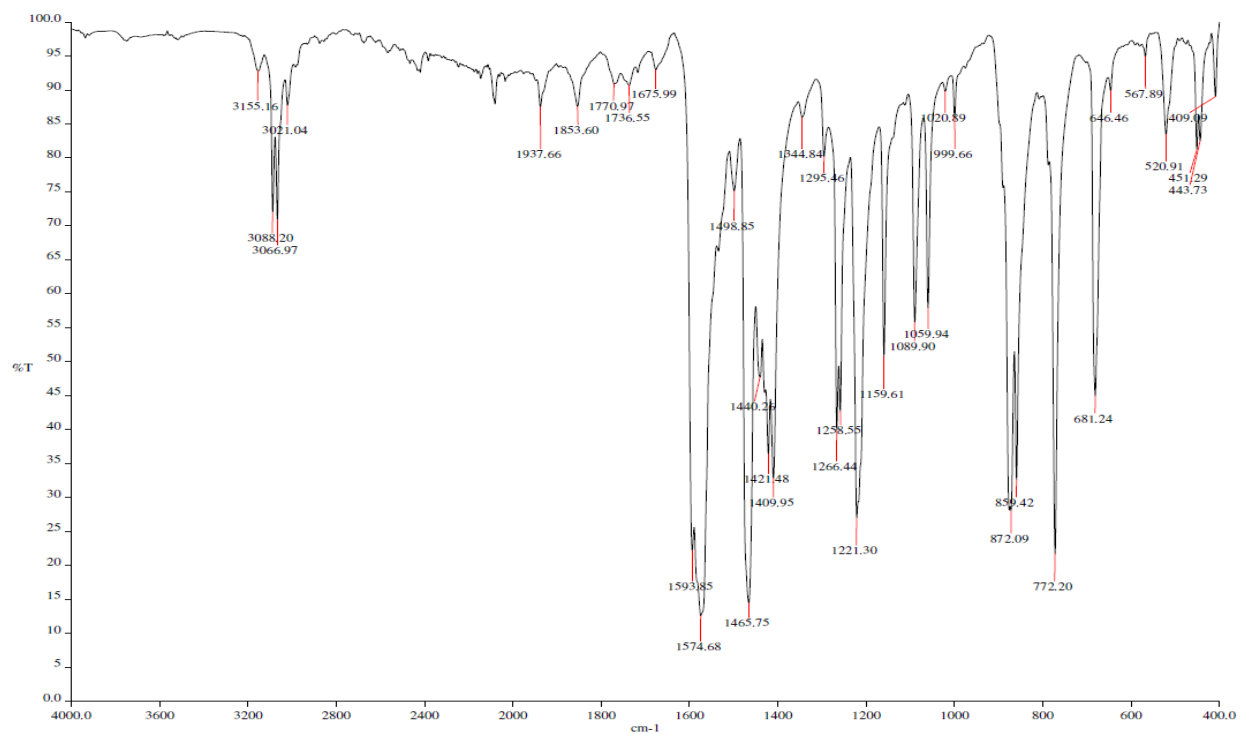

Figure S47. ATR-FTIR Spectra of  $Pb(SC_6H_4F-3)_2$

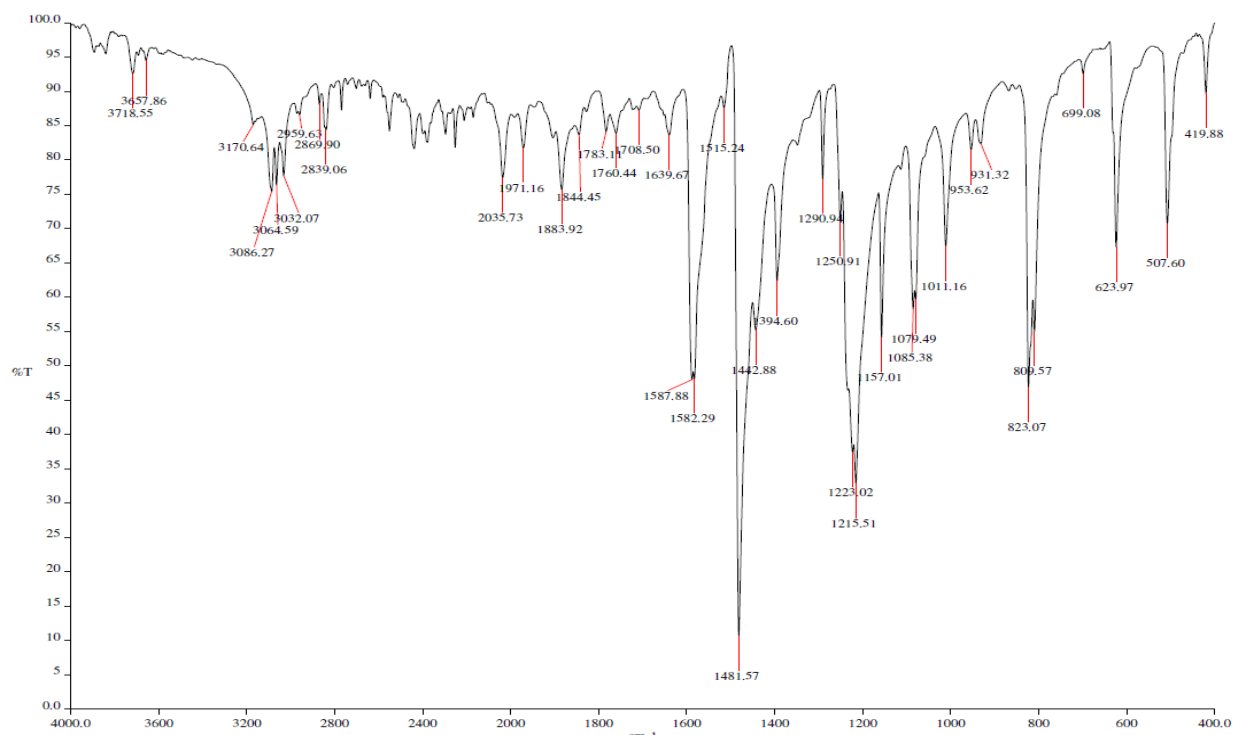

Figure S48. ATR-FTIR Spectra of  $Pb(SC_6H_4F-4)_2$
